# Supplementary material for: SARS-CoV-2 spike protein activates NOX2-p66SHC axis via inhibiting SLAMF8 to promote thrombogenesis
Source: Research Square preprint supplement (doi:10.21203/rs.3.rs-5572297/v1), 2025-01-03
Supplement: Supplementary file 1 [file 17c6007458cc7ace963818e4.xlsx]

## Sheet: Sheet1
Table. S2 Relevant primer information in qPCR
ID	Direction	Sequence
VWF	Forward	GCATCTCCGTGGTCCTGAAGC
	Reverse	GAGGTTGCTGCTGGTGAGGTC
ICAM1	Forward	TCCTCACCGTGTACTGGACTCC
	Reverse	CTGGCAGCGTAGGGTAAGGTTC
TF	Forward	GGCGCTTCAGGCACTACAA
	Reverse	TTGATTGACGGGTTTGGGTTC
SELE	Forward	AGAGTGGAGCCTGGTCTTACA
	Reverse	CCTTTGCTGACAATAAGCACTGG
SELP	Forward	ACTGCCAGAATCGCTACACAG
	Reverse	CACCCATGTCCATGTCTTATTGT
PAI-1	Forward	GGGATCAGCTCCGTGGATCT
	Reverse	TGCACTTTGGTACTCTTGAAGTT
GAPDH	Forward	AAGGTGAAGGTCGGAGTCAA
	Reverse	AATGAAGGGGTCATTGATGG
