# Supplementary material for: SARS-CoV-2 spike protein activates NOX2-p66SHC axis via inhibiting SLAMF8 to promote thrombogenesis
Source: Research Square preprint supplement (doi:10.21203/rs.3.rs-5572297/v1), 2025-01-03
Supplement: Supplementary file 2 [file 2d06cdf1aaaa45967493a77f.docx]

Supplementary Materials for

**SARS-CoV-2 spike protein activates NOX2-p66SHC axis via inhibiting SLAMF8 to promote thrombogenesis**


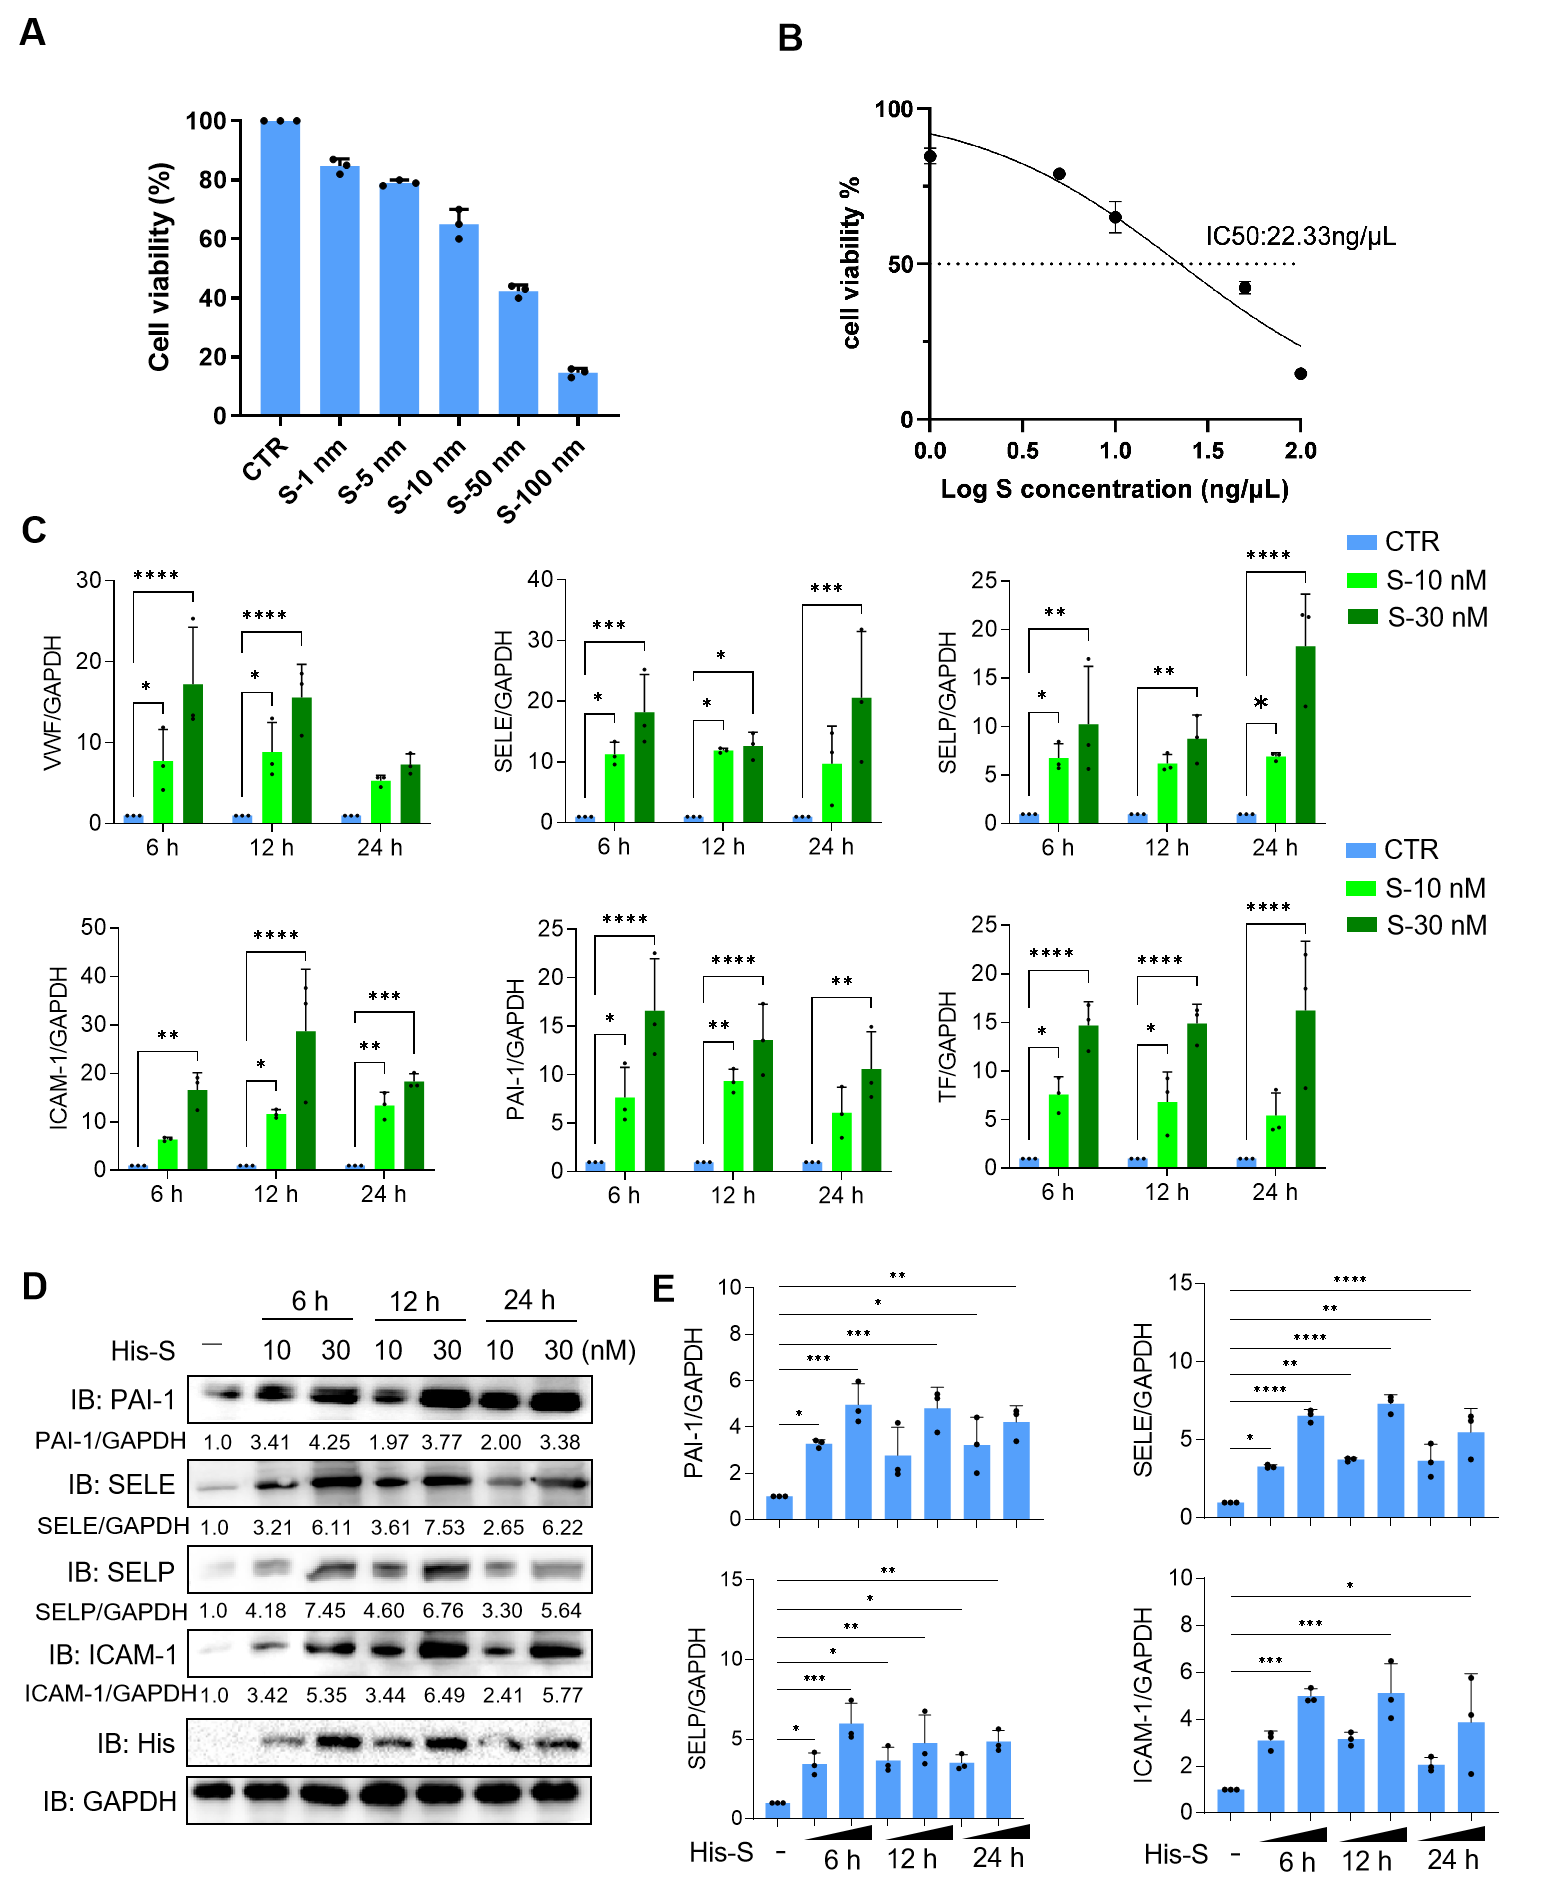


**Fig. S1 SARS-CoV-2 S protein induce the expression of thrombotropic factor in endothelial cells.**

**(A)** Human airway epithelial cells (HAECs) were left untreated (CTR) or treated with varying concentrations of S protein (1-100 nM) for 6 h. Cell viability was assessed using the CCK8 assay. Data are expressed as the mean ± SD of three independent experiments.

(**B**) The 50% inhibitory concentration (IC50) of the S protein in HAECs was determined.

**(C**-**E)** HAECs were left untreated (CTR) or treated with different doses of S protein for varying time periods. The mRNA expression levels of thrombotropic factors, including *PAI-1*, *SELE*, *SELP*, *ICAM-1*, *VWF*, and *TF*, were quantified using quantitative PCR (qPCR), with *GAPDH* serving as the internal reference control (C) and the protein levels were analyzed by immunoblotting with the indicated antibodies (D). Grayscale statistical analysis of PAI-1, SELE, SELP, and ICAM-1 relative to GAPDH in (D) is shown (E). Data are expressed as the mean ± SD of three independent experiments, with asterisks indicating significant differences (**P* < 0.05, ***P* < 0.01, ****P* < 0.001, and *****P* < 0.0001).


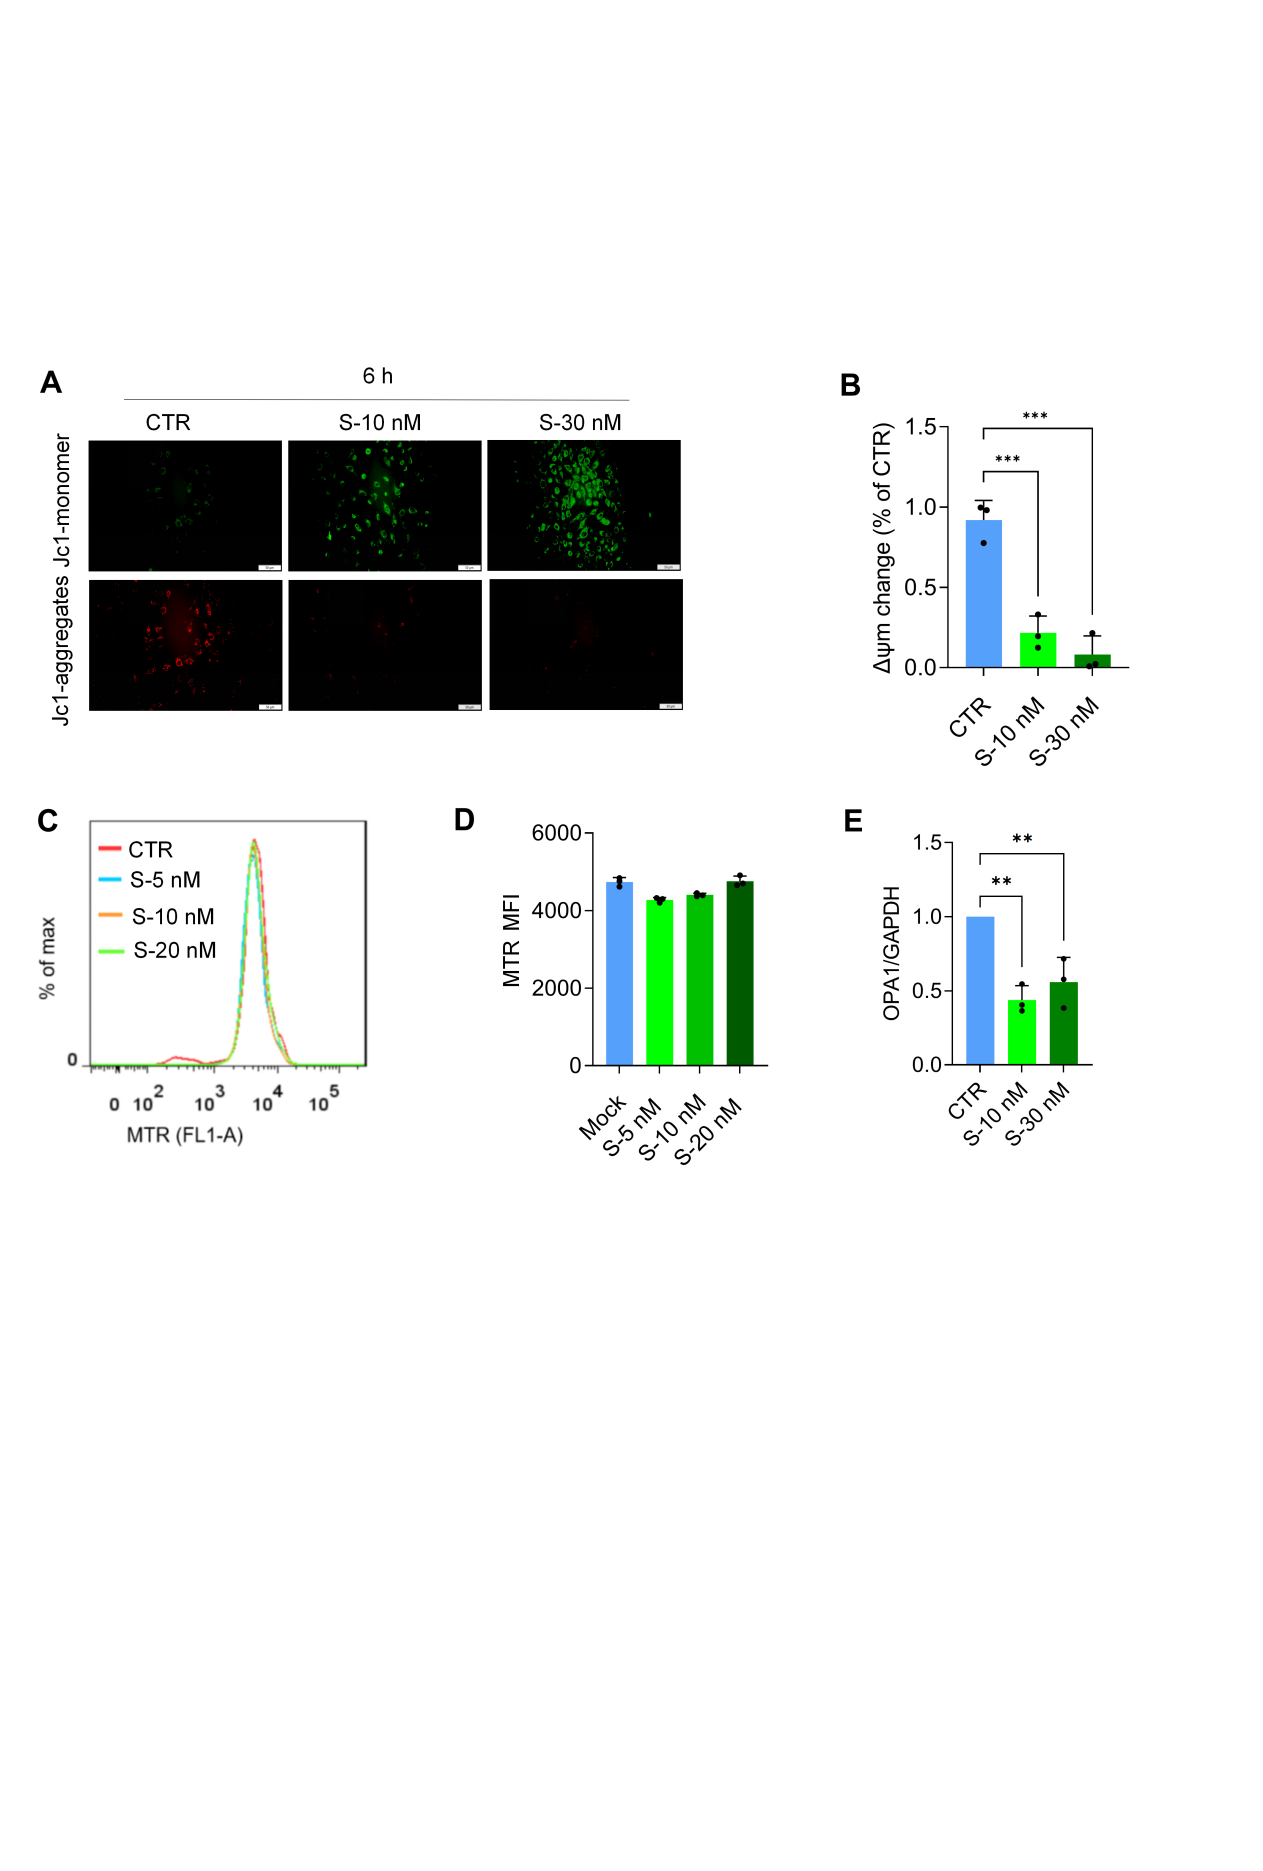


**Fig. S2 SARS-CoV-2 S protein causes mitochondrial damage in endothelial cells.**

**(A** and **B)** HAECs were either left untreated (CTR) or treated with different doses of S protein for 6 h. Viable cells were stained with fluorescent probe JC-1 to assess the mitochondrial membrane potential (MMP) (A). The degree of mitochondria depolarization was quantified by calculating the ratio of red to green fluorescence intensity (B).

(**C** and **D**) HAECs that either untreated or treated with S protein for 12 h were stained with MitoTracker Red (MTR) and detected by flow cytometry (C). The mean fluorescence intensity (MFI) of MTR was quantified, with results shown for more than 3 independent experiments (D).

**(E)** Grayscale analysis of OPA1 levels relative to GAPDH, as indicated in (Fig1. G), is presented. Data are expressed as the mean ± SD of three independent experiments, with asterisks indicating significant differences (***P* < 0.01, and ****P* < 0.001).


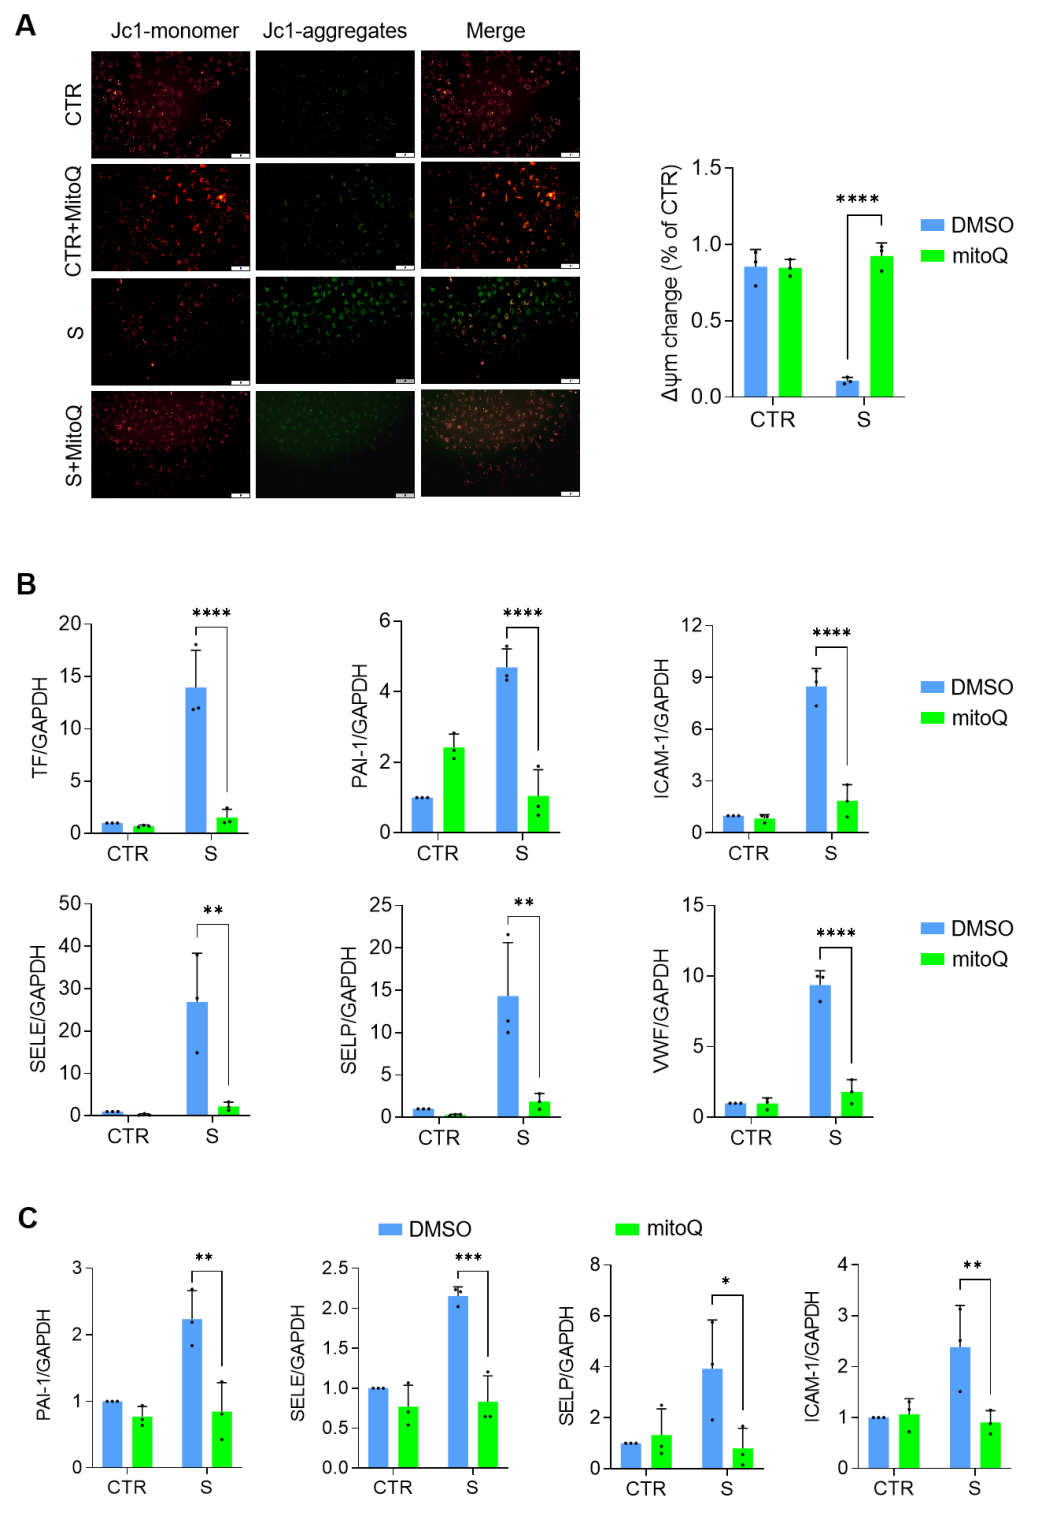


**Fig. S3 S protein induces oxidative stress in endothelial cells.**

**(A)** HAECs were incubated with S protein for 6 h and then treated with either 10 μM MitoQ or DMSO for additional 6 h. Viable cells were stained with fluorescent probe JC-1 to assess mitochondria depolarization, which was quantified by measuring the ratio of red to green fluorescence intensity.

**(B)** HAECs were treated as indicated in (A), and the mRNA levels of thrombotropic factors, including *PAI-1*, *SELE*, *SELP*, *ICAM-1*, *VWF*, and *TF*, were quantified using qPCR, with *GAPDH* serving as the internal reference control.

**(C)** Grayscale statistical analysis of PAI-1, SELE, SELP, and ICAM-1 levels relative to GAPDH is presented, as indicated in (Fig. 2C).Data are expressed as the mean ± SD of three independent experiments, with asterisks indicating significant differences (**P* < 0.05, ***P* < 0.01, ****P* < 0.001, and *****P* < 0.0001).


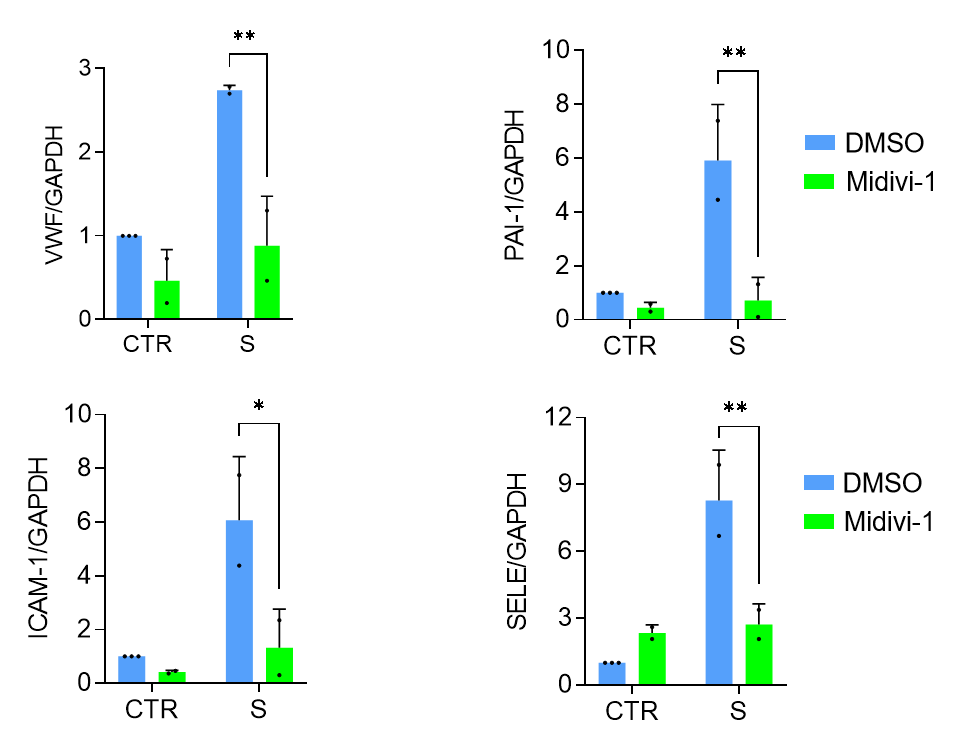


**Fig. S4 Inhibition of mitochondrial fission alleviates coagulation abnormalities induced by S protein.**

Human airway epithelial cells **(**HAECs) were incubated with S protein for 6 h and subsequently treated with 10 μM mitochondrial division inhibitor 1 (Mdivi-1) or DMSO for an additional 6 h. The mRNA expression levels of *VWF*, *PAI-1*, *ICAM-1*, and *SELE* were quantified using qPCR. Data are expressed as the mean ± SD of three independent experiments, with asterisks indicating significant differences (**P* < 0.05, ***P* < 0.01).


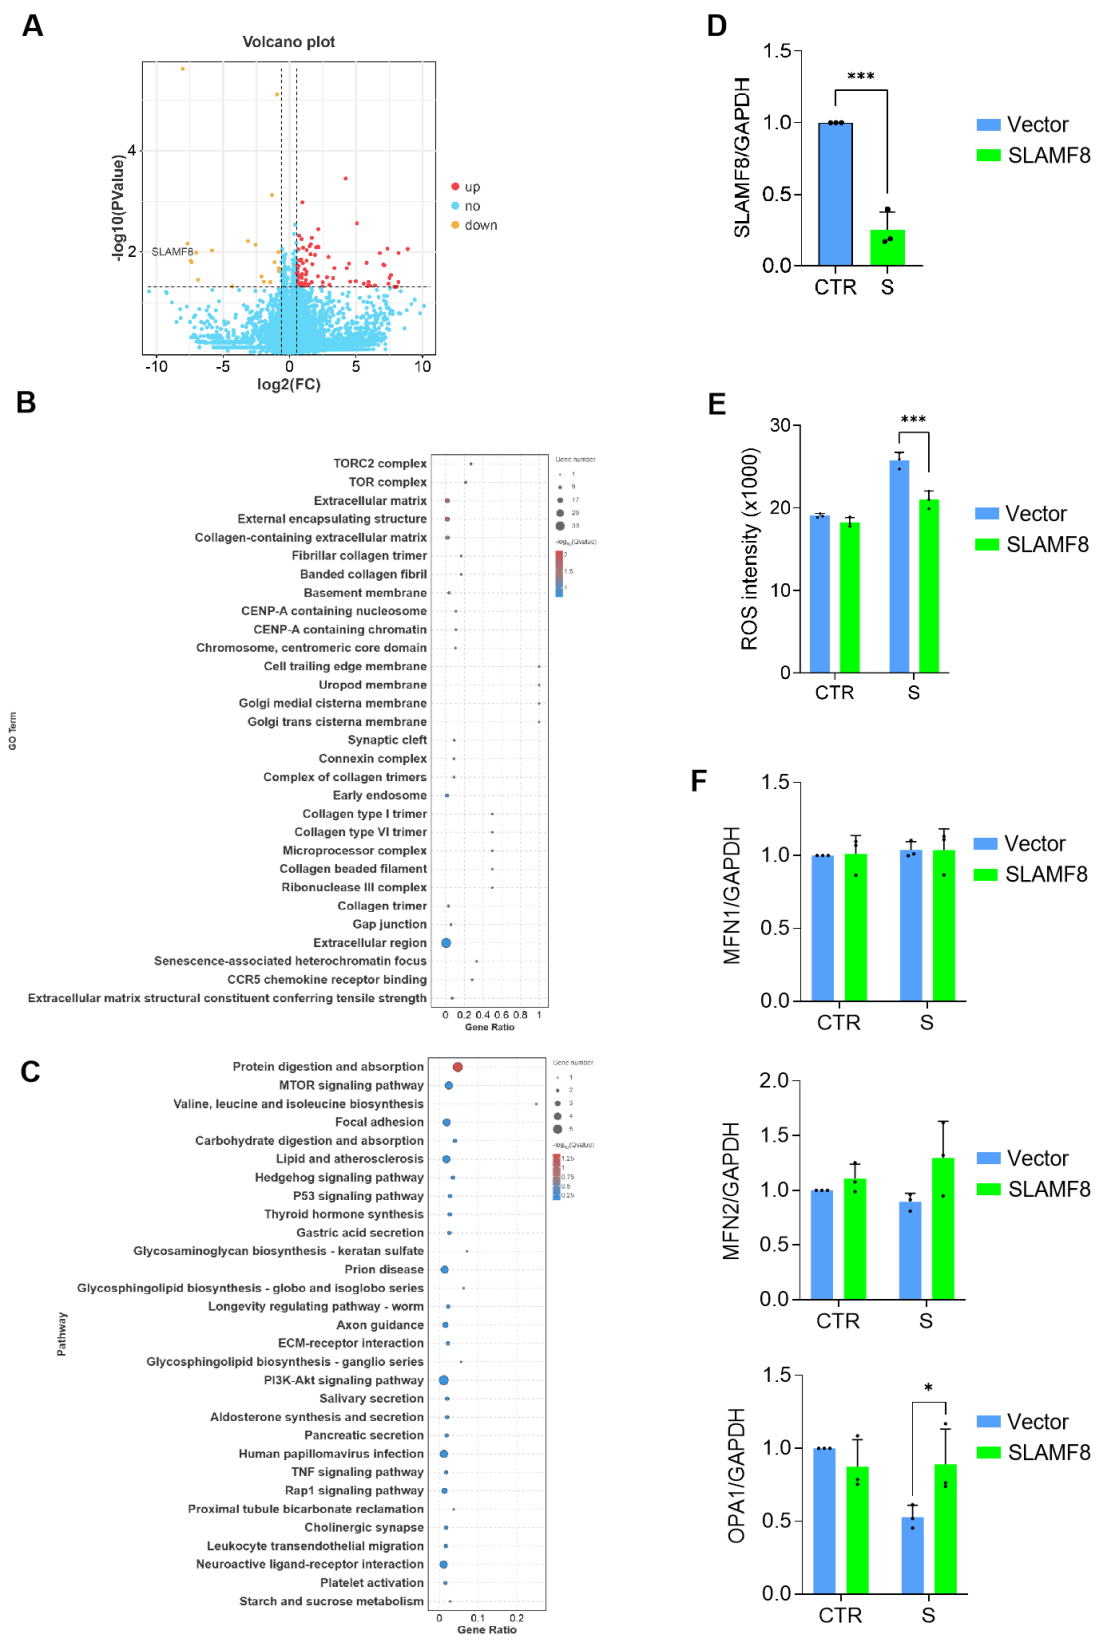


**Fig. S5 S protein inhibits SLAMF8 expression to promote thrombosis.**

**(A-C)** HAECs were either untreated or treated with 10 nM SARS-CoV-2 S protein for 24 h, then the cells were collected for RNA sequencing. Differentially expressed genes (DEGs) between S protein- treated and untreated cells are presented in a volcano plot (A). Gene Ontology (GO) enrichment analysis (B) and Kyoto Encyclopedia of Genes and Genomes (KEGG) pathway analysis (C) of the DEGs are shown.

**(D)** HAECs were either untreated or treated with S protein for 24 h. The mRNA level of *SLAMF8* relative to *GAPDH* was quantified using qPCR.

**(E)** HAECs were transfected with Flag-tagged SLAMF8 or vector control plasmids. At 48 hpt, cells were either untreated or treated with S protein for 6 h. The viable cells stained with DCFH-DA, and ROS levels were measured using a fluorescent microplate reader.

**(F)** Grayscale statistical analysis of MFN1, MFN2 and OPA1 expression relative to GAPDH from data presented in (Fig. 3C) is displayed. Data are expressed as the mean ± SD of three independent experiments, with asterisks indicating significant differences (**P* < 0.05, ***P* < 0.01, ****P* < 0.001, and *****P* < 0.0001).


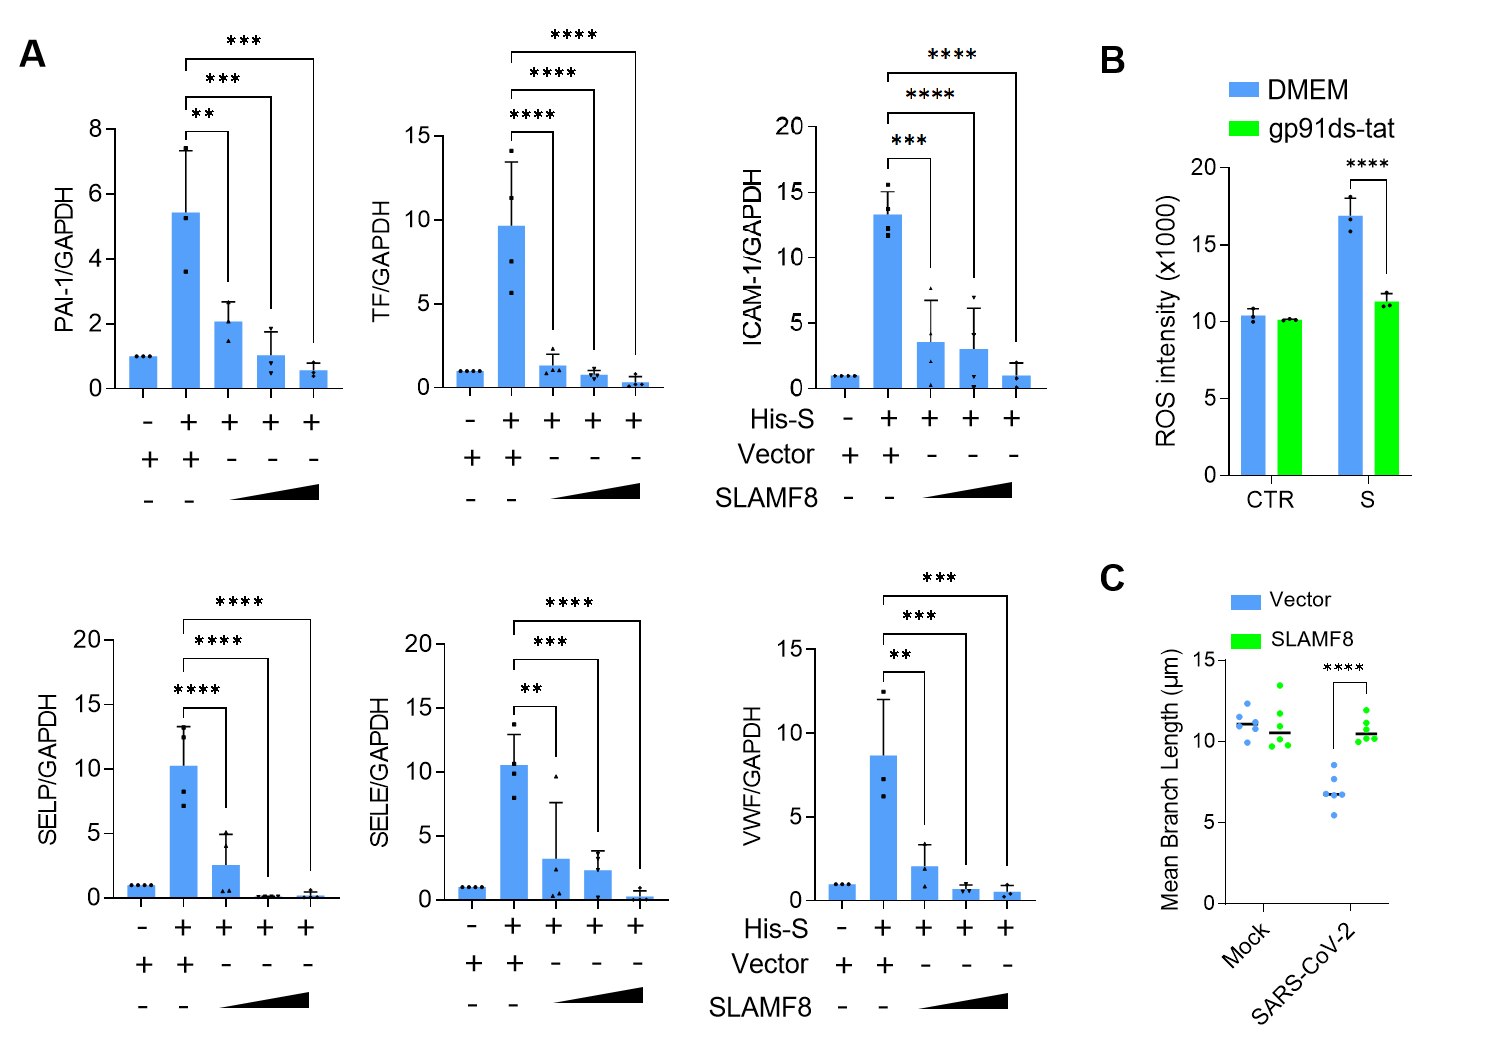


**Fig. S6 S protein enhances ROS production to promote thrombosis.**

**(A)** HAECs were transfected with Flag-tagged SLAMF8 or vector control plasmids. At 48 hours post-transfection (hpt), cells were either untreated or treated with S protein (10 nM) for 6 h. The mRNA levels of *VWF*, *SELP*, *SELE*, *ICAM-1*, *PAI-1*, and *TF* relative to *GAPDH* were quantified using qPCR.

**(B)** HAECs were incubated with NOX2 inhibitor gp91ds-tat for 12 h and then treated with S protein for 6 h. The viable cells were stained with DCFH-DA, and reactive oxygen species (ROS) levels were measured using a fluorescent microplate reader.

**(C)** The statistical analysis of the mean branch length of mitochondria performed in (Fig. 6F) by ImageJ (n ≥ 6)**.** Data are expressed as the mean ± SD, with asterisks indicating significant differences (***P* < 0.01, ****P* < 0.001, and *****P* < 0.0001).
