# Supplementary material for: SARS-CoV-2 spike protein activates NOX2-p66SHC axis via inhibiting SLAMF8 to promote thrombogenesis
Source: Research Square preprint supplement (doi:10.21203/rs.3.rs-5572297/v1), 2025-01-03
Supplement: Supplementary file 3 [file ac1af5852df88c85f1e7e5d8.xlsx]

## Sheet: HC-vs-S.all.annot
id	log2(fc)	PValue	FDR	Symbol	Description	KEGG_A_class	KEGG_B_class	Pathway	K_ID	GO Component	GO Function	GO Process	TF_family
ENSG00000289517	-7.99435	2.45215e-06	0.0386165	CYB5R3	novel protein	Metabolism	Carbohydrate metabolism	ko00520//Amino sugar and nucleotide sugar metabolism	K00326	GO:0005789//endoplasmic reticulum membrane	GO:0004128//cytochrome-b5 reductase activity, acting on NAD(P)H;GO:0016491//oxidoreductase activity	-	--
ENSG00000273345	-7.63178	0.00692007	0.999113	Cdkl3	novel transcript	-	-	-	-	-	-	-	--
ENSG00000158714	-7.39232	0.0152829	0.999113	SLAMF8	SLAM family member 8 [Source:HGNC Symbol;Acc:HGNC:21391]	-	-	-	-	GO:0009986//cell surface;GO:0016020//membrane	GO:0005515//protein binding;GO:0038023//signaling receptor activity;GO:0042802//identical protein binding	GO:0002232//leukocyte chemotaxis involved in inflammatory response;GO:0002336//B-1 B cell lineage commitment;GO:0010760//negative regulation of macrophage chemotaxis;GO:0033860//regulation of NAD(P)H oxidase activity;GO:0042742//defense response to bacterium;GO:0043549//regulation of kinase activity;GO:0045577//regulation of B cell differentiation;GO:0060266//negative regulation of respiratory bu…	--
ENSG00000128536	-7.32793	0.0162441	0.999113	CDHR3	cadherin related family member 3 [Source:HGNC Symbol;Acc:HGNC:26308]	-	-	-	-	GO:0005886//plasma membrane;GO:0005912//adherens junction;GO:0016020//membrane;GO:0016342//catenin complex	GO:0001618//virus receptor activity;GO:0005509//calcium ion binding;GO:0005515//protein binding;GO:0045296//cadherin binding	GO:0000902//cell morphogenesis;GO:0007043//cell-cell junction assembly;GO:0007155//cell adhesion;GO:0007156//homophilic cell adhesion via plasma membrane adhesion molecules;GO:0016339//calcium-dependent cell-cell adhesion via plasma membrane cell adhesion molecules;GO:0034332//adherens junction organization;GO:0046718//viral entry into host cell;GO:0098742//cell-cell adhesion via plasma-membrane …	--
ENSG00000286098	-6.96963	0.0104612	0.999113	ZNF844	novel protein	Human Diseases	Infectious disease: viral	ko05168//Herpes simplex virus 1 infection	K09228	-	-	-	--
ENSG00000285505	-6.84967	0.0361974	0.999113	ATP1A3	novel protein, ATP1A3-RABAC1 readthrough	Environmental Information Processing;Environmental Information Processing;Organismal Systems;Organismal Systems;Organismal Systems;Organismal Systems;Organismal Systems;Organismal Systems;Organismal Systems;Organismal Systems;Organismal Systems;Organismal Systems;Organismal Systems;Organismal Systems;Organismal Systems;Organismal Systems;Organismal Systems;Organismal Systems	Signal transduction;Signal transduction;Circulatory system;Endocrine system;Digestive system;Digestive system;Endocrine system;Digestive system;Digestive system;Endocrine system;Circulatory system;Digestive system;Endocrine system;Digestive system;Excretory system;Digestive system;Excretory system;Excretory system	ko04024//cAMP signaling pathway;ko04022//cGMP-PKG signaling pathway;ko04261//Adrenergic signaling in cardiomyocytes;ko04919//Thyroid hormone signaling pathway;ko04972//Pancreatic secretion;ko04974//Protein digestion and absorption;ko04925//Aldosterone synthesis and secretion;ko04970//Salivary secretion;ko04976//Bile secretion;ko04911//Insulin secretion;ko04260//Cardiac muscle contraction;ko04971/…	K01539;K01539;K01539;K01539;K01539;K01539;K01539;K01539;K01539;K01539;K01539;K01539;K01539;K01539;K01539;K01539;K01539;K01539	GO:0005886//plasma membrane;GO:0016020//membrane	GO:0000166//nucleotide binding;GO:0005524//ATP binding;GO:0008556//P-type potassium transmembrane transporter activity;GO:0016887//ATP hydrolysis activity;GO:0046872//metal ion binding	GO:0006811//ion transport;GO:0006813//potassium ion transport;GO:0034220//ion transmembrane transport;GO:0071805//potassium ion transmembrane transport	--
ENSG00000165816	-5.79874	0.00944961	0.999113	VWA2	von Willebrand factor A domain containing 2 [Source:HGNC Symbol;Acc:HGNC:24709]	-	-	-	-	GO:0005576//extracellular region;GO:0005604//basement membrane;GO:0005615//extracellular space;GO:0062023//collagen-containing extracellular matrix;GO:0070062//extracellular exosome	GO:0005509//calcium ion binding;GO:0005515//protein binding;GO:0042802//identical protein binding	GO:0007161//calcium-independent cell-matrix adhesion;GO:0046626//regulation of insulin receptor signaling pathway	--
ENSG00000161929	-4.26366	0.048851	0.999113	SCIMP	SLP adaptor and CSK interacting membrane protein [Source:HGNC Symbol;Acc:HGNC:33504]	-	-	-	-	GO:0001726//ruffle;GO:0001772//immunological synapse;GO:0005886//plasma membrane;GO:0016020//membrane;GO:0016021//integral component of membrane;GO:0030175//filopodium;GO:0031256//leading edge membrane;GO:0031259//uropod membrane;GO:0031410//cytoplasmic vesicle;GO:0042995//cell projection;GO:0043235//receptor complex;GO:0045335//phagocytic vesicle;GO:0097197//tetraspanin-enriched microdomain	GO:0005515//protein binding;GO:0060090//molecular adaptor activity	GO:0002720//positive regulation of cytokine production involved in immune response;GO:0002732//positive regulation of dendritic cell cytokine production;GO:0031666//positive regulation of lipopolysaccharide-mediated signaling pathway;GO:0032735//positive regulation of interleukin-12 production;GO:0032755//positive regulation of interleukin-6 production;GO:0032874//positive regulation of stress-ac…	--
ENSG00000183979	-3.08746	0.00618627	0.999113	NPB	neuropeptide B [Source:HGNC Symbol;Acc:HGNC:30099]	Environmental Information Processing	Signaling molecules and interaction	ko04080//Neuroactive ligand-receptor interaction	K05267	GO:0005576//extracellular region	GO:0001664//G protein-coupled receptor binding;GO:0005515//protein binding	GO:0007186//G protein-coupled receptor signaling pathway;GO:0007218//neuropeptide signaling pathway;GO:0007631//feeding behavior	--
ENSG00000257390	-2.51771	0.00733934	0.999113	DNAJC14	novel protein	-	-	-	-	GO:0016607//nuclear speck;GO:0036464//cytoplasmic ribonucleoprotein granule	GO:0005515//protein binding;GO:0050780//dopamine receptor binding	-	--
ENSG00000289027	-2.07364	0.0311336	0.999113	KRIT1	novel protein	Environmental Information Processing;Organismal Systems	Signal transduction;Aging	ko04015//Rap1 signaling pathway;ko04212//Longevity regulating pathway - worm	K17705;K17705	GO:0005789//endoplasmic reticulum membrane;GO:0005856//cytoskeleton	GO:0004497//monooxygenase activity;GO:0005506//iron ion binding;GO:0005515//protein binding;GO:0016705//oxidoreductase activity, acting on paired donors, with incorporation or reduction of molecular oxygen;GO:0020037//heme binding;GO:0046872//metal ion binding	GO:0006629//lipid metabolic process	--
ENSG00000164683	-1.90479	0.0393469	0.999113	HEY1	hes related family bHLH transcription factor with YRPW motif 1 [Source:HGNC Symbol;Acc:HGNC:4880]	Human Diseases;Human Diseases;Human Diseases;Environmental Information Processing	Cancer: overview;Infectious disease: viral;Cancer: specific types;Signal transduction	ko05200//Pathways in cancer;ko05165//Human papillomavirus infection;ko05224//Breast cancer;ko04330//Notch signaling pathway	K09091;K09091;K09091;K09091	GO:0000785//chromatin;GO:0005634//nucleus;GO:0005654//nucleoplasm;GO:0005737//cytoplasm	GO:0000978//RNA polymerase II cis-regulatory region sequence-specific DNA binding;GO:0000981//DNA-binding transcription factor activity, RNA polymerase II-specific;GO:0001227//DNA-binding transcription repressor activity, RNA polymerase II-specific;GO:0003677//DNA binding;GO:0003700//DNA-binding transcription factor activity;GO:0005515//protein binding;GO:0046983//protein dimerization activity;GO…	GO:0000122//negative regulation of transcription by RNA polymerase II;GO:0001525//angiogenesis;GO:0003161//cardiac conduction system development;GO:0003180//aortic valve morphogenesis;GO:0003184//pulmonary valve morphogenesis;GO:0003190//atrioventricular valve formation;GO:0003203//endocardial cushion morphogenesis;GO:0003208//cardiac ventricle morphogenesis;GO:0006355//regulation of transcriptio…	bHLH
ENSG00000175820	-1.41143	0.0402084	0.999113	CCDC168	coiled-coil domain containing 168 [Source:HGNC Symbol;Acc:HGNC:26851]	-	-	-	-	GO:0016020//membrane	-	-	--
ENSG00000256500	-1.27678	0.000766733	0.999113	KLC1	novel protein	Human Diseases;Human Diseases;Human Diseases;Human Diseases;Human Diseases;Human Diseases;Human Diseases	Neurodegenerative disease;Neurodegenerative disease;Neurodegenerative disease;Neurodegenerative disease;Neurodegenerative disease;Neurodegenerative disease;Infectious disease: bacterial	ko05022//Pathways of neurodegeneration - multiple diseases;ko05010//Alzheimer disease;ko05014//Amyotrophic lateral sclerosis;ko05016//Huntington disease;ko05020//Prion disease;ko05012//Parkinson disease;ko05132//Salmonella infection	K10407;K10407;K10407;K10407;K10407;K10407;K10407	GO:0005737//cytoplasm;GO:0005739//mitochondrion;GO:0005743//mitochondrial inner membrane;GO:0005856//cytoskeleton;GO:0005871//kinesin complex;GO:0005874//microtubule;GO:0016020//membrane	GO:0005515//protein binding	GO:0097193//intrinsic apoptotic signaling pathway	--
ENSG00000132688	-1.08527	0.0163108	0.999113	NES	nestin [Source:HGNC Symbol;Acc:HGNC:7756]	-	-	-	-	GO:0005737//cytoplasm;GO:0005882//intermediate filament;GO:0045111//intermediate filament cytoskeleton	GO:0003674//molecular_function;GO:0005515//protein binding;GO:0019215//intermediate filament binding;GO:0031730//CCR5 chemokine receptor binding	GO:0000086//G2/M transition of mitotic cell cycle;GO:0007399//nervous system development;GO:0007417//central nervous system development;GO:0007420//brain development;GO:0030844//positive regulation of intermediate filament depolymerization;GO:0031076//embryonic camera-type eye development;GO:0032091//negative regulation of protein binding;GO:0043086//negative regulation of catalytic activity;GO:0…	--
ENSG00000183054	-0.8992	7.87329e-06	0.0619943	RGPD6	RANBP2 like and GRIP domain containing 6 [Source:HGNC Symbol;Acc:HGNC:32419]	-	-	-	-	GO:0005643//nuclear pore;GO:0005737//cytoplasm	GO:0005096//GTPase activator activity;GO:0005515//protein binding	GO:0006607//NLS-bearing protein import into nucleus;GO:0046907//intracellular transport	--
ENSG00000123358	-0.805578	0.0102623	0.999113	NR4A1	nuclear receptor subfamily 4 group A member 1 [Source:HGNC Symbol;Acc:HGNC:7980]	Environmental Information Processing;Environmental Information Processing;Human Diseases;Organismal Systems;Organismal Systems	Signal transduction;Signal transduction;Endocrine and metabolic disease;Endocrine system;Endocrine system	ko04151//PI3K-Akt signaling pathway;ko04010//MAPK signaling pathway;ko04934//Cushing syndrome;ko04925//Aldosterone synthesis and secretion;ko04927//Cortisol synthesis and secretion	K04465;K04465;K04465;K04465;K04465	GO:0000785//chromatin;GO:0005634//nucleus;GO:0005654//nucleoplasm;GO:0005667//transcription regulator complex;GO:0005737//cytoplasm;GO:0005739//mitochondrion;GO:0005829//cytosol;GO:0031965//nuclear membrane;GO:0098793//presynapse	GO:0000978//RNA polymerase II cis-regulatory region sequence-specific DNA binding;GO:0000981//DNA-binding transcription factor activity, RNA polymerase II-specific;GO:0001228//DNA-binding transcription activator activity, RNA polymerase II-specific;GO:0003677//DNA binding;GO:0003700//DNA-binding transcription factor activity;GO:0004879//nuclear receptor activity;GO:0005515//protein binding;GO:000…	GO:0001938//positive regulation of endothelial cell proliferation;GO:0001975//response to amphetamine;GO:0002042//cell migration involved in sprouting angiogenesis;GO:0006351//transcription, DNA-templated;GO:0006355//regulation of transcription, DNA-templated;GO:0006357//regulation of transcription by RNA polymerase II;GO:0006366//transcription by RNA polymerase II;GO:0006915//apoptotic process;G…	NGFIB-like
ENSG00000283761	-0.783022	0.0242624	0.999113	MFSD14A	novel protein	-	-	-	-	GO:0000139//Golgi membrane;GO:0005794//Golgi apparatus;GO:0016020//membrane;GO:0016021//integral component of membrane	GO:0015165//pyrimidine nucleotide-sugar transmembrane transporter activity;GO:0022857//transmembrane transporter activity	GO:0008643//carbohydrate transport;GO:0055085//transmembrane transport;GO:0090481//pyrimidine nucleotide-sugar transmembrane transport	--
ENSG00000274810	-0.77455	0.0211441	0.999113	NPHP3-ACAD11	NPHP3-ACAD11 readthrough (NMD candidate) [Source:HGNC Symbol;Acc:HGNC:48351]	-	-	-	-	GO:0005737//cytoplasm;GO:0005856//cytoskeleton;GO:0005871//kinesin complex;GO:0005874//microtubule;GO:0097543//ciliary inversin compartment;GO:0097546//ciliary base	GO:0005515//protein binding	GO:0001822//kidney development;GO:0007368//determination of left/right symmetry;GO:0060026//convergent extension;GO:0060271//cilium assembly	--
ENSG00000263513	-0.575914	0.0159924	0.999113	FAM72C	family with sequence similarity 72 member C [Source:HGNC Symbol;Acc:HGNC:30602]	-	-	-	-	GO:0005737//cytoplasm;GO:0005829//cytosol;GO:0043231//intracellular membrane-bounded organelle	-	-	--
ENSG00000188153	-0.566957	0.0380756	0.999113	COL4A5	collagen type IV alpha 5 chain [Source:HGNC Symbol;Acc:HGNC:2207]	Human Diseases;Environmental Information Processing;Human Diseases;Cellular Processes;Human Diseases;Organismal Systems;Organismal Systems;Human Diseases;Human Diseases;Environmental Information Processing	Cancer: overview;Signal transduction;Infectious disease: viral;Cellular community - eukaryotes;Infectious disease: parasitic;Endocrine system;Digestive system;Endocrine and metabolic disease;Cancer: specific types;Signaling molecules and interaction	ko05200//Pathways in cancer;ko04151//PI3K-Akt signaling pathway;ko05165//Human papillomavirus infection;ko04510//Focal adhesion;ko05146//Amoebiasis;ko04926//Relaxin signaling pathway;ko04974//Protein digestion and absorption;ko04933//AGE-RAGE signaling pathway in diabetic complications;ko05222//Small cell lung cancer;ko04512//ECM-receptor interaction	K06237;K06237;K06237;K06237;K06237;K06237;K06237;K06237;K06237;K06237	GO:0005576//extracellular region;GO:0005581//collagen trimer;GO:0005587//collagen type IV trimer;GO:0005604//basement membrane;GO:0005615//extracellular space;GO:0005788//endoplasmic reticulum lumen;GO:0016020//membrane;GO:0031012//extracellular matrix;GO:0031594//neuromuscular junction;GO:0062023//collagen-containing extracellular matrix;GO:0110165//cellular anatomical entity	GO:0005201//extracellular matrix structural constituent;GO:0005515//protein binding;GO:0030020//extracellular matrix structural constituent conferring tensile strength	GO:0007528//neuromuscular junction development;GO:0030198//extracellular matrix organization;GO:0038063//collagen-activated tyrosine kinase receptor signaling pathway	--
ENSG00000136244	-0.56574	0.0256968	0.999113	IL6	interleukin 6 [Source:HGNC Symbol;Acc:HGNC:6018]	Human Diseases;Human Diseases;Human Diseases;Environmental Information Processing;Human Diseases;Human Diseases;Environmental Information Processing;Human Diseases;Human Diseases;Human Diseases;Human Diseases;Human Diseases;Human Diseases;Human Diseases;Human Diseases;Human Diseases;Human Diseases;Human Diseases;Organismal Systems;Human Diseases;Human Diseases;Organismal Systems;Environmental Inf…	Infectious disease: viral;Cancer: overview;Neurodegenerative disease;Signal transduction;Neurodegenerative disease;Infectious disease: viral;Signaling molecules and interaction;Neurodegenerative disease;Infectious disease: bacterial;Infectious disease: viral;Cancer: overview;Infectious disease: bacterial;Infectious disease: bacterial;Infectious disease: viral;Infectious disease: viral;Cardiovascu…	ko05168//Herpes simplex virus 1 infection;ko05200//Pathways in cancer;ko05022//Pathways of neurodegeneration - multiple diseases;ko04151//PI3K-Akt signaling pathway;ko05010//Alzheimer disease;ko05171//Coronavirus disease - COVID-19;ko04060//Cytokine-cytokine receptor interaction;ko05020//Prion disease;ko05130//Pathogenic Escherichia coli infection;ko05169//Epstein-Barr virus infection;ko05202//Tr…	K05405;K05405;K05405;K05405;K05405;K05405;K05405;K05405;K05405;K05405;K05405;K05405;K05405;K05405;K05405;K05405;K05405;K05405;K05405;K05405;K05405;K05405;K05405;K05405;K05405;K05405;K05405;K05405;K05405;K05405;K05405;K05405;K05405;K05405;K05405;K05405;K05405;K05405;K05405;K05405;K05405;K05405;K05405;K05405;K05405;K05405;K05405;K05405;K05405;K05405;K05405	GO:0005576//extracellular region;GO:0005615//extracellular space;GO:0005788//endoplasmic reticulum lumen;GO:0005896//interleukin-6 receptor complex	GO:0005102//signaling receptor binding;GO:0005125//cytokine activity;GO:0005138//interleukin-6 receptor binding;GO:0005515//protein binding;GO:0008083//growth factor activity	GO:0001781//neutrophil apoptotic process;GO:0002314//germinal center B cell differentiation;GO:0002384//hepatic immune response;GO:0002446//neutrophil mediated immunity;GO:0002548//monocyte chemotaxis;GO:0002639//positive regulation of immunoglobulin production;GO:0002675//positive regulation of acute inflammatory response;GO:0002690//positive regulation of leukocyte chemotaxis;GO:0006953//acute-…	--
ENSG00000237515	-0.546575	0.0310915	0.999113	SHISA9	shisa family member 9 [Source:HGNC Symbol;Acc:HGNC:37231]	-	-	-	-	GO:0005886//plasma membrane;GO:0008328//ionotropic glutamate receptor complex;GO:0014069//postsynaptic density;GO:0016020//membrane;GO:0032281//AMPA glutamate receptor complex;GO:0032591//dendritic spine membrane;GO:0042995//cell projection;GO:0045202//synapse;GO:0045211//postsynaptic membrane;GO:0098839//postsynaptic density membrane;GO:0098978//glutamatergic synapse	GO:0030165//PDZ domain binding	GO:0048172//regulation of short-term neuronal synaptic plasticity;GO:0098962//regulation of postsynaptic neurotransmitter receptor activity;GO:2000311//regulation of AMPA receptor activity	--
ENSG00000138036	-0.517271	0.00871654	0.999113	DYNC2LI1	dynein cytoplasmic 2 light intermediate chain 1 [Source:HGNC Symbol;Acc:HGNC:24595]	Human Diseases;Organismal Systems	Infectious disease: bacterial;Excretory system	ko05132//Salmonella infection;ko04962//Vasopressin-regulated water reabsorption	K10417;K10417	GO:0005737//cytoplasm;GO:0005794//Golgi apparatus;GO:0005813//centrosome;GO:0005815//microtubule organizing center;GO:0005829//cytosol;GO:0005856//cytoskeleton;GO:0005868//cytoplasmic dynein complex;GO:0005874//microtubule;GO:0005881//cytoplasmic microtubule;GO:0005929//cilium;GO:0005930//axoneme;GO:0030286//dynein complex;GO:0031514//motile cilium;GO:0035869//ciliary transition zone;GO:0036064//…	GO:0005515//protein binding;GO:0045504//dynein heavy chain binding	GO:0007368//determination of left/right symmetry;GO:0030030//cell projection organization;GO:0035721//intraciliary retrograde transport;GO:0035735//intraciliary transport involved in cilium assembly;GO:0060271//cilium assembly;GO:1902017//regulation of cilium assembly	--
ENSG00000144802	-0.516831	0.00920283	0.999113	NFKBIZ	NFKB inhibitor zeta [Source:HGNC Symbol;Acc:HGNC:29805]	Human Diseases	Cancer: overview	ko05202//Transcriptional misregulation in cancer	K14242	GO:0005634//nucleus;GO:0016607//nuclear speck;GO:0036464//cytoplasmic ribonucleoprotein granule	GO:0000978//RNA polymerase II cis-regulatory region sequence-specific DNA binding;GO:0003712//transcription coregulator activity;GO:0005515//protein binding	GO:0002224//toll-like receptor signaling pathway;GO:0002250//adaptive immune response;GO:0002285//lymphocyte activation involved in immune response;GO:0002317//plasma cell differentiation;GO:0002456//T cell mediated immunity;GO:0002544//chronic inflammatory response;GO:0006366//transcription by RNA polymerase II;GO:0006954//inflammatory response;GO:0009410//response to xenobiotic stimulus;GO:0010…	--
ENSG00000163535	-0.484883	0.0239832	0.999113	SGO2	shugoshin 2 [Source:HGNC Symbol;Acc:HGNC:30812]	-	-	-	-	GO:0000775//chromosome, centromeric region;GO:0000776//kinetochore;GO:0005634//nucleus;GO:0005654//nucleoplasm;GO:0005694//chromosome;GO:0005829//cytosol;GO:0016604//nuclear body;GO:0030892//mitotic cohesin complex	GO:0005515//protein binding	GO:0000070//mitotic sister chromatid segregation;GO:0007049//cell cycle;GO:0007059//chromosome segregation;GO:0045143//homologous chromosome segregation;GO:0051177//meiotic sister chromatid cohesion;GO:0051301//cell division;GO:0051321//meiotic cell cycle;GO:0051754//meiotic sister chromatid cohesion, centromeric	--
ENSG00000164953	-0.478021	0.0121279	0.999113	TMEM67	transmembrane protein 67 [Source:HGNC Symbol;Acc:HGNC:28396]	-	-	-	-	GO:0005737//cytoplasm;GO:0005783//endoplasmic reticulum;GO:0005789//endoplasmic reticulum membrane;GO:0005813//centrosome;GO:0005856//cytoskeleton;GO:0005886//plasma membrane;GO:0005929//cilium;GO:0016020//membrane;GO:0030659//cytoplasmic vesicle membrane;GO:0035869//ciliary transition zone;GO:0036038//MKS complex;GO:0042995//cell projection;GO:0060170//ciliary membrane	GO:0005515//protein binding;GO:0031005//filamin binding;GO:0051082//unfolded protein binding	GO:0010826//negative regulation of centrosome duplication;GO:0030030//cell projection organization;GO:0030433//ubiquitin-dependent ERAD pathway;GO:0035567//non-canonical Wnt signaling pathway;GO:0060271//cilium assembly	--
ENSG00000258790	-0.476531	0.0285987	0.999113	PRORP	novel transcript	-	-	-	-	-	-	-	--
ENSG00000125740	-0.475956	0.0120365	0.999113	FOSB	FosB proto-oncogene, AP-1 transcription factor subunit [Source:HGNC Symbol;Acc:HGNC:3797]	Human Diseases;Organismal Systems;Organismal Systems;Human Diseases;Human Diseases	Substance dependence;Development and regeneration;Immune system;Substance dependence;Substance dependence	ko05034//Alcoholism;ko04380//Osteoclast differentiation;ko04657//IL-17 signaling pathway;ko05031//Amphetamine addiction;ko05030//Cocaine addiction	K09029;K09029;K09029;K09029;K09029	GO:0000785//chromatin;GO:0005634//nucleus;GO:0005654//nucleoplasm;GO:0043231//intracellular membrane-bounded organelle	GO:0000978//RNA polymerase II cis-regulatory region sequence-specific DNA binding;GO:0000981//DNA-binding transcription factor activity, RNA polymerase II-specific;GO:0001228//DNA-binding transcription activator activity, RNA polymerase II-specific;GO:0003677//DNA binding;GO:0003690//double-stranded DNA binding;GO:0003700//DNA-binding transcription factor activity;GO:0005515//protein binding;GO:0…	GO:0000122//negative regulation of transcription by RNA polymerase II;GO:0006355//regulation of transcription, DNA-templated;GO:0006357//regulation of transcription by RNA polymerase II;GO:0006366//transcription by RNA polymerase II;GO:0007565//female pregnancy;GO:0009410//response to xenobiotic stimulus;GO:0009612//response to mechanical stimulus;GO:0032570//response to progesterone;GO:0032870//…	TF_bZIP
ENSG00000182621	-0.46931	0.0399852	0.999113	PLCB1	phospholipase C beta 1 [Source:HGNC Symbol;Acc:HGNC:15917]	Metabolism;Human Diseases;Human Diseases;Human Diseases;Human Diseases;Environmental Information Processing;Organismal Systems;Human Diseases;Human Diseases;Environmental Information Processing;Environmental Information Processing;Human Diseases;Human Diseases;Organismal Systems;Organismal Systems;Human Diseases;Environmental Information Processing;Environmental Information Processing;Human Disea…	Global and overview maps;Cancer: overview;Neurodegenerative disease;Neurodegenerative disease;Neurodegenerative disease;Signal transduction;Immune system;Infectious disease: bacterial;Infectious disease: viral;Signal transduction;Signal transduction;Cardiovascular disease;Cardiovascular disease;Immune system;Immune system;Infectious disease: parasitic;Signal transduction;Signal transduction;Endoc…	ko01100//Metabolic pathways;ko05200//Pathways in cancer;ko05022//Pathways of neurodegeneration - multiple diseases;ko05010//Alzheimer disease;ko05016//Huntington disease;ko04020//Calcium signaling pathway;ko04613//Neutrophil extracellular trap formation;ko05131//Shigellosis;ko05163//Human cytomegalovirus infection;ko04015//Rap1 signaling pathway;ko04072//Phospholipase D signaling pathway;ko05417/…	K05858;K05858;K05858;K05858;K05858;K05858;K05858;K05858;K05858;K05858;K05858;K05858;K05858;K05858;K05858;K05858;K05858;K05858;K05858;K05858;K05858;K05858;K05858;K05858;K05858;K05858;K05858;K05858;K05858;K05858;K05858;K05858;K05858;K05858;K05858;K05858;K05858;K05858;K05858;K05858;K05858;K05858;K05858;K05858;K05858;K05858;K05858;K05858;K05858;K05858;K05858;K05858;K05858;K05858;K05858;K05858;K05858;…	GO:0000785//chromatin;GO:0005634//nucleus;GO:0005737//cytoplasm;GO:0005829//cytosol;GO:0016020//membrane;GO:0016607//nuclear speck;GO:0031965//nuclear membrane;GO:0032991//protein-containing complex;GO:0070062//extracellular exosome;GO:0098978//glutamatergic synapse;GO:0098982//GABA-ergic synapse;GO:0099524//postsynaptic cytosol;GO:0110165//cellular anatomical entity	GO:0004435//phosphatidylinositol phospholipase C activity;GO:0004629//phospholipase C activity;GO:0005096//GTPase activator activity;GO:0005246//calcium channel regulator activity;GO:0005509//calcium ion binding;GO:0005515//protein binding;GO:0005516//calmodulin binding;GO:0005521//lamin binding;GO:0005546//phosphatidylinositol-4,5-bisphosphate binding;GO:0008081//phosphoric diester hydrolase act…	GO:0000086//G2/M transition of mitotic cell cycle;GO:0006629//lipid metabolic process;GO:0007165//signal transduction;GO:0007186//G protein-coupled receptor signaling pathway;GO:0007200//phospholipase C-activating G protein-coupled receptor signaling pathway;GO:0007207//phospholipase C-activating G protein-coupled acetylcholine receptor signaling pathway;GO:0007213//G protein-coupled acetylcholin…	--
ENSG00000165494	-0.458866	0.0439169	0.999113	PCF11	PCF11 cleavage and polyadenylation factor subunit [Source:HGNC Symbol;Acc:HGNC:30097]	Genetic Information Processing	Translation	ko03015//mRNA surveillance pathway	K14400	GO:0005634//nucleus;GO:0005654//nucleoplasm;GO:0005737//cytoplasm;GO:0005739//mitochondrion;GO:0005849//mRNA cleavage factor complex	GO:0000993//RNA polymerase II complex binding;GO:0003729//mRNA binding	GO:0006369//termination of RNA polymerase II transcription;GO:0006378//mRNA polyadenylation;GO:0006379//mRNA cleavage;GO:0006397//mRNA processing	--
ENSG00000138182	-0.439403	0.0384782	0.999113	KIF20B	kinesin family member 20B [Source:HGNC Symbol;Acc:HGNC:7212]	-	-	-	-	GO:0000922//spindle pole;GO:0005634//nucleus;GO:0005654//nucleoplasm;GO:0005730//nucleolus;GO:0005737//cytoplasm;GO:0005813//centrosome;GO:0005815//microtubule organizing center;GO:0005819//spindle;GO:0005829//cytosol;GO:0005856//cytoskeleton;GO:0005871//kinesin complex;GO:0005874//microtubule;GO:0015630//microtubule cytoskeleton;GO:0030424//axon;GO:0030426//growth cone;GO:0030496//midbody;GO:004…	GO:0000166//nucleotide binding;GO:0003774//cytoskeletal motor activity;GO:0003777//microtubule motor activity;GO:0005515//protein binding;GO:0005524//ATP binding;GO:0008017//microtubule binding;GO:0008574//plus-end-directed microtubule motor activity;GO:0016887//ATP hydrolysis activity;GO:0042803//protein homodimerization activity;GO:0050699//WW domain binding	GO:0001843//neural tube closure;GO:0007018//microtubule-based movement;GO:0007049//cell cycle;GO:0007088//regulation of mitotic nuclear division;GO:0008284//positive regulation of cell population proliferation;GO:0032467//positive regulation of cytokinesis;GO:0035372//protein localization to microtubule;GO:0048812//neuron projection morphogenesis;GO:0051301//cell division;GO:0051726//regulation o…	--
ENSG00000165997	-0.432005	0.0244276	0.999113	ARL5B	ADP ribosylation factor like GTPase 5B [Source:HGNC Symbol;Acc:HGNC:23052]	-	-	-	-	GO:0005737//cytoplasm;GO:0005802//trans-Golgi network	GO:0000166//nucleotide binding;GO:0003924//GTPase activity;GO:0005515//protein binding;GO:0005525//GTP binding	GO:0006886//intracellular protein transport;GO:0016192//vesicle-mediated transport;GO:1903292//protein localization to Golgi membrane	--
ENSG00000154734	-0.410317	0.0402048	0.999113	ADAMTS1	ADAM metallopeptidase with thrombospondin type 1 motif 1 [Source:HGNC Symbol;Acc:HGNC:217]	-	-	-	-	GO:0005576//extracellular region;GO:0005604//basement membrane;GO:0031012//extracellular matrix;GO:0031410//cytoplasmic vesicle;GO:0062023//collagen-containing extracellular matrix	GO:0004222//metalloendopeptidase activity;GO:0005515//protein binding;GO:0008201//heparin binding;GO:0008233//peptidase activity;GO:0008237//metallopeptidase activity;GO:0008270//zinc ion binding;GO:0016787//hydrolase activity;GO:0046872//metal ion binding	GO:0001542//ovulation from ovarian follicle;GO:0001822//kidney development;GO:0006508//proteolysis;GO:0007229//integrin-mediated signaling pathway;GO:0008285//negative regulation of cell population proliferation;GO:0016525//negative regulation of angiogenesis;GO:0030198//extracellular matrix organization;GO:0060347//heart trabecula formation;GO:1900087//positive regulation of G1/S transition of m…	--
ENSG00000165813	-0.397652	0.0223197	0.999113	CCDC186	coiled-coil domain containing 186 [Source:HGNC Symbol;Acc:HGNC:24349]	-	-	-	-	GO:0005794//Golgi apparatus;GO:0005802//trans-Golgi network	GO:0031267//small GTPase binding	GO:0009617//response to bacterium;GO:0035773//insulin secretion involved in cellular response to glucose stimulus;GO:0042593//glucose homeostasis;GO:0099518//vesicle cytoskeletal trafficking	--
ENSG00000108423	-0.389156	0.0374205	0.999113	TUBD1	tubulin delta 1 [Source:HGNC Symbol;Acc:HGNC:16811]	-	-	-	-	GO:0005634//nucleus;GO:0005654//nucleoplasm;GO:0005737//cytoplasm;GO:0005814//centriole;GO:0005829//cytosol;GO:0005856//cytoskeleton;GO:0005874//microtubule;GO:0005929//cilium;GO:0015630//microtubule cytoskeleton;GO:0016020//membrane;GO:0042995//cell projection	GO:0000166//nucleotide binding;GO:0005200//structural constituent of cytoskeleton;GO:0005525//GTP binding	GO:0000226//microtubule cytoskeleton organization;GO:0000278//mitotic cell cycle;GO:0007017//microtubule-based process;GO:0030030//cell projection organization;GO:0045880//positive regulation of smoothened signaling pathway	--
ENSG00000142178	-0.388189	0.0231719	0.999113	SIK1	salt inducible kinase 1 [Source:HGNC Symbol;Acc:HGNC:11142]	Organismal Systems	Endocrine system	ko04922//Glucagon signaling pathway	K19008	GO:0005634//nucleus;GO:0005737//cytoplasm	GO:0000166//nucleotide binding;GO:0000287//magnesium ion binding;GO:0004672//protein kinase activity;GO:0004674//protein serine/threonine kinase activity;GO:0005515//protein binding;GO:0005524//ATP binding;GO:0008140//cAMP response element binding protein binding;GO:0016301//kinase activity;GO:0016740//transferase activity;GO:0019901//protein kinase binding;GO:0042826//histone deacetylase binding…	GO:0002028//regulation of sodium ion transport;GO:0006468//protein phosphorylation;GO:0007049//cell cycle;GO:0007346//regulation of mitotic cell cycle;GO:0010830//regulation of myotube differentiation;GO:0010868//negative regulation of triglyceride biosynthetic process;GO:0016310//phosphorylation;GO:0030154//cell differentiation;GO:0032792//negative regulation of CREB transcription factor activit…	--
ENSG00000163235	-0.382557	0.0164952	0.999113	TGFA	transforming growth factor alpha [Source:HGNC Symbol;Acc:HGNC:11765]	Human Diseases;Environmental Information Processing;Environmental Information Processing;Environmental Information Processing;Human Diseases;Organismal Systems;Human Diseases;Human Diseases;Environmental Information Processing;Human Diseases;Human Diseases;Human Diseases;Human Diseases;Human Diseases	Cancer: overview;Signal transduction;Signal transduction;Signal transduction;Cancer: specific types;Endocrine system;Cancer: specific types;Cancer: specific types;Signal transduction;Drug resistance: antineoplastic;Cancer: specific types;Cancer: specific types;Cancer: specific types;Cancer: specific types	ko05200//Pathways in cancer;ko04151//PI3K-Akt signaling pathway;ko04010//MAPK signaling pathway;ko04014//Ras signaling pathway;ko05225//Hepatocellular carcinoma;ko04915//Estrogen signaling pathway;ko05215//Prostate cancer;ko05210//Colorectal cancer;ko04012//ErbB signaling pathway;ko01521//EGFR tyrosine kinase inhibitor resistance;ko05212//Pancreatic cancer;ko05214//Glioma;ko05211//Renal cell carc…	K08774;K08774;K08774;K08774;K08774;K08774;K08774;K08774;K08774;K08774;K08774;K08774;K08774;K08774	GO:0005576//extracellular region;GO:0005615//extracellular space;GO:0005634//nucleus;GO:0005789//endoplasmic reticulum membrane;GO:0005886//plasma membrane;GO:0009986//cell surface;GO:0012507//ER to Golgi transport vesicle membrane;GO:0016020//membrane;GO:0016323//basolateral plasma membrane;GO:0030669//clathrin-coated endocytic vesicle membrane;GO:0031410//cytoplasmic vesicle;GO:0033116//endopla…	GO:0005102//signaling receptor binding;GO:0005154//epidermal growth factor receptor binding;GO:0005515//protein binding;GO:0008083//growth factor activity;GO:0030297//transmembrane receptor protein tyrosine kinase activator activity;GO:0048018//receptor ligand activity	GO:0001525//angiogenesis;GO:0007165//signal transduction;GO:0007173//epidermal growth factor receptor signaling pathway;GO:0008284//positive regulation of cell population proliferation;GO:0009410//response to xenobiotic stimulus;GO:0035556//intracellular signal transduction;GO:0038134//ERBB2-EGFR signaling pathway;GO:0042060//wound healing;GO:0043066//negative regulation of apoptotic process;GO:0…	--
ENSG00000175105	-0.381027	0.0143633	0.999113	ZNF654	zinc finger protein 654 [Source:HGNC Symbol;Acc:HGNC:25612]	-	-	-	-	GO:0005634//nucleus	GO:0000981//DNA-binding transcription factor activity, RNA polymerase II-specific;GO:0003677//DNA binding;GO:0046872//metal ion binding	GO:0006357//regulation of transcription by RNA polymerase II	zf-C2H2
ENSG00000136108	-0.357953	0.0306107	0.999113	CKAP2	cytoskeleton associated protein 2 [Source:HGNC Symbol;Acc:HGNC:1990]	-	-	-	-	GO:0000922//spindle pole;GO:0005737//cytoplasm;GO:0005813//centrosome;GO:0005819//spindle;GO:0005856//cytoskeleton;GO:0005874//microtubule;GO:0015630//microtubule cytoskeleton;GO:0072686//mitotic spindle	-	GO:0000281//mitotic cytokinesis;GO:0006915//apoptotic process;GO:0007026//negative regulation of microtubule depolymerization;GO:0007049//cell cycle;GO:0045944//positive regulation of transcription by RNA polymerase II	--
ENSG00000123636	-0.352377	0.0442709	0.999113	BAZ2B	bromodomain adjacent to zinc finger domain 2B [Source:HGNC Symbol;Acc:HGNC:963]	-	-	-	-	GO:0005634//nucleus	GO:0003677//DNA binding;GO:0005515//protein binding;GO:0046872//metal ion binding	GO:0006338//chromatin remodeling;GO:0006357//regulation of transcription by RNA polymerase II	MBD
ENSG00000113070	-0.343179	0.0360874	0.999113	HBEGF	heparin binding EGF like growth factor [Source:HGNC Symbol;Acc:HGNC:3059]	Human Diseases;Human Diseases;Organismal Systems;Organismal Systems;Human Diseases;Organismal Systems;Environmental Information Processing;Human Diseases;Human Diseases	Infectious disease: viral;Cancer: overview;Endocrine system;Endocrine system;Drug resistance: antineoplastic;Endocrine system;Signal transduction;Infectious disease: bacterial;Cancer: specific types	ko05171//Coronavirus disease - COVID-19;ko05205//Proteoglycans in cancer;ko04915//Estrogen signaling pathway;ko04928//Parathyroid hormone synthesis, secretion and action;ko01522//Endocrine resistance;ko04912//GnRH signaling pathway;ko04012//ErbB signaling pathway;ko05120//Epithelial cell signaling in Helicobacter pylori infection;ko05219//Bladder cancer	K08523;K08523;K08523;K08523;K08523;K08523;K08523;K08523;K08523	GO:0005576//extracellular region;GO:0005615//extracellular space;GO:0005886//plasma membrane;GO:0009986//cell surface;GO:0016020//membrane;GO:0030666//endocytic vesicle membrane;GO:0030669//clathrin-coated endocytic vesicle membrane	GO:0005102//signaling receptor binding;GO:0005154//epidermal growth factor receptor binding;GO:0005515//protein binding;GO:0008083//growth factor activity;GO:0008201//heparin binding;GO:0030297//transmembrane receptor protein tyrosine kinase activator activity;GO:0048018//receptor ligand activity	GO:0007165//signal transduction;GO:0007173//epidermal growth factor receptor signaling pathway;GO:0007517//muscle organ development;GO:0008016//regulation of heart contraction;GO:0008284//positive regulation of cell population proliferation;GO:0016477//cell migration;GO:0030307//positive regulation of cell growth;GO:0030335//positive regulation of cell migration;GO:0035313//wound healing, spreadi…	--
ENSG00000118515	-0.331646	0.0132069	0.999113	SGK1	serum/glucocorticoid regulated kinase 1 [Source:HGNC Symbol;Acc:HGNC:10810]	Environmental Information Processing;Environmental Information Processing;Environmental Information Processing;Organismal Systems	Signal transduction;Signal transduction;Signal transduction;Excretory system	ko04151//PI3K-Akt signaling pathway;ko04150//mTOR signaling pathway;ko04068//FoxO signaling pathway;ko04960//Aldosterone-regulated sodium reabsorption	K13302;K13302;K13302;K13302	GO:0005634//nucleus;GO:0005654//nucleoplasm;GO:0005737//cytoplasm;GO:0005739//mitochondrion;GO:0005783//endoplasmic reticulum;GO:0005789//endoplasmic reticulum membrane;GO:0005829//cytosol;GO:0005886//plasma membrane;GO:0016020//membrane;GO:0016607//nuclear speck	GO:0000166//nucleotide binding;GO:0004672//protein kinase activity;GO:0004674//protein serine/threonine kinase activity;GO:0004712//protein serine/threonine/tyrosine kinase activity;GO:0005246//calcium channel regulator activity;GO:0005515//protein binding;GO:0005524//ATP binding;GO:0015459//potassium channel regulator activity;GO:0016301//kinase activity;GO:0016740//transferase activity;GO:00170…	GO:0001558//regulation of cell growth;GO:0006468//protein phosphorylation;GO:0006814//sodium ion transport;GO:0006915//apoptotic process;GO:0006974//cellular response to DNA damage stimulus;GO:0007616//long-term memory;GO:0008217//regulation of blood pressure;GO:0016310//phosphorylation;GO:0018105//peptidyl-serine phosphorylation;GO:0030334//regulation of cell migration;GO:0032411//positive regul…	--
ENSG00000116954	-0.329806	0.0352671	0.999113	RRAGC	Ras related GTP binding C [Source:HGNC Symbol;Acc:HGNC:19902]	Human Diseases;Environmental Information Processing;Cellular Processes	Infectious disease: bacterial;Signal transduction;Transport and catabolism	ko05131//Shigellosis;ko04150//mTOR signaling pathway;ko04140//Autophagy - animal	K16186;K16186;K16186	GO:0005634//nucleus;GO:0005654//nucleoplasm;GO:0005737//cytoplasm;GO:0005764//lysosome;GO:0005829//cytosol;GO:0043231//intracellular membrane-bounded organelle;GO:1990131//Gtr1-Gtr2 GTPase complex	GO:0000166//nucleotide binding;GO:0000287//magnesium ion binding;GO:0003924//GTPase activity;GO:0005515//protein binding;GO:0005525//GTP binding;GO:0016787//hydrolase activity;GO:0019003//GDP binding;GO:0046982//protein heterodimerization activity;GO:0051020//GTPase binding	GO:0006351//transcription, DNA-templated;GO:0006915//apoptotic process;GO:0007264//small GTPase mediated signal transduction;GO:0008104//protein localization;GO:0008380//RNA splicing;GO:0009267//cellular response to starvation;GO:0010506//regulation of autophagy;GO:0032006//regulation of TOR signaling;GO:0032008//positive regulation of TOR signaling;GO:0034198//cellular response to amino acid sta…	--
ENSG00000104375	-0.324406	0.0276953	0.999113	STK3	serine/threonine kinase 3 [Source:HGNC Symbol;Acc:HGNC:11406]	Environmental Information Processing;Environmental Information Processing;Environmental Information Processing;Cellular Processes;Environmental Information Processing	Signal transduction;Signal transduction;Signal transduction;Cell growth and death;Signal transduction	ko04010//MAPK signaling pathway;ko04390//Hippo signaling pathway;ko04391//Hippo signaling pathway - fly;ko04214//Apoptosis - fly;ko04392//Hippo signaling pathway - multiple species	K04412;K04412;K04412;K04412;K04412	GO:0005634//nucleus;GO:0005737//cytoplasm;GO:0005829//cytosol;GO:0032991//protein-containing complex	GO:0000166//nucleotide binding;GO:0000287//magnesium ion binding;GO:0004672//protein kinase activity;GO:0004674//protein serine/threonine kinase activity;GO:0005515//protein binding;GO:0005524//ATP binding;GO:0016301//kinase activity;GO:0016740//transferase activity;GO:0042802//identical protein binding;GO:0043539//protein serine/threonine kinase activator activity;GO:0046872//metal ion binding;G…	GO:0001841//neural tube formation;GO:0003157//endocardium development;GO:0006468//protein phosphorylation;GO:0006606//protein import into nucleus;GO:0006915//apoptotic process;GO:0007165//signal transduction;GO:0007254//JNK cascade;GO:0007417//central nervous system development;GO:0008283//cell population proliferation;GO:0008285//negative regulation of cell population proliferation;GO:0008625//e…	--
ENSG00000173212	-0.320946	0.0302383	0.999113	MAB21L3	mab-21 like 3 [Source:HGNC Symbol;Acc:HGNC:26787]	-	-	-	-	-	GO:0005515//protein binding	-	--
ENSG00000113790	-0.317816	0.0195719	0.999113	EHHADH	enoyl-CoA hydratase and 3-hydroxyacyl CoA dehydrogenase [Source:HGNC Symbol;Acc:HGNC:3247]	Metabolism;Cellular Processes;Organismal Systems;Metabolism;Metabolism;Metabolism;Metabolism;Metabolism;Metabolism;Metabolism;Metabolism	Global and overview maps;Transport and catabolism;Endocrine system;Amino acid metabolism;Global and overview maps;Amino acid metabolism;Lipid metabolism;Amino acid metabolism;Carbohydrate metabolism;Metabolism of other amino acids;Carbohydrate metabolism	ko01100//Metabolic pathways;ko04146//Peroxisome;ko03320//PPAR signaling pathway;ko00310//Lysine degradation;ko01212//Fatty acid metabolism;ko00280//Valine, leucine and isoleucine degradation;ko00071//Fatty acid degradation;ko00380//Tryptophan metabolism;ko00640//Propanoate metabolism;ko00410//beta-Alanine metabolism;ko00650//Butanoate metabolism	K07514;K07514;K07514;K07514;K07514;K07514;K07514;K07514;K07514;K07514;K07514	GO:0005777//peroxisome;GO:0005782//peroxisomal matrix;GO:0005829//cytosol	GO:0003824//catalytic activity;GO:0003857//3-hydroxyacyl-CoA dehydrogenase activity;GO:0004165//dodecenoyl-CoA delta-isomerase activity;GO:0004300//enoyl-CoA hydratase activity;GO:0005515//protein binding;GO:0016491//oxidoreductase activity;GO:0016508//long-chain-enoyl-CoA hydratase activity;GO:0016509//long-chain-3-hydroxyacyl-CoA dehydrogenase activity;GO:0016616//oxidoreductase activity, actin…	GO:0006629//lipid metabolic process;GO:0006631//fatty acid metabolic process;GO:0006635//fatty acid beta-oxidation;GO:0008152//metabolic process;GO:0033540//fatty acid beta-oxidation using acyl-CoA oxidase	--
ENSG00000068885	-0.314964	0.0326752	0.999113	IFT80	intraflagellar transport 80 [Source:HGNC Symbol;Acc:HGNC:29262]	-	-	-	-	GO:0005737//cytoplasm;GO:0005813//centrosome;GO:0005856//cytoskeleton;GO:0005929//cilium;GO:0030992//intraciliary transport particle B;GO:0036064//ciliary basal body;GO:0042995//cell projection;GO:0097542//ciliary tip;GO:0097731//9+0 non-motile cilium	GO:0005515//protein binding	GO:0001501//skeletal system development;GO:0001649//osteoblast differentiation;GO:0001958//endochondral ossification;GO:0002062//chondrocyte differentiation;GO:0003417//growth plate cartilage development;GO:0003418//growth plate cartilage chondrocyte differentiation;GO:0007224//smoothened signaling pathway;GO:0010839//negative regulation of keratinocyte proliferation;GO:0033687//osteoblast prolif…	--
ENSG00000129534	-0.314201	0.0444676	0.999113	MIS18BP1	MIS18 binding protein 1 [Source:HGNC Symbol;Acc:HGNC:20190]	-	-	-	-	GO:0000775//chromosome, centromeric region;GO:0005634//nucleus;GO:0005654//nucleoplasm;GO:0005694//chromosome	GO:0003677//DNA binding;GO:0005515//protein binding	GO:0007049//cell cycle;GO:0051301//cell division	MYB
ENSG00000122257	-0.312673	0.0238444	0.999113	RBBP6	RB binding protein 6, ubiquitin ligase [Source:HGNC Symbol;Acc:HGNC:9889]	-	-	-	-	GO:0005634//nucleus;GO:0005694//chromosome;GO:0005730//nucleolus;GO:0005737//cytoplasm;GO:0005813//centrosome;GO:0005815//microtubule organizing center;GO:0005829//cytosol;GO:0005856//cytoskeleton;GO:0016607//nuclear speck;GO:0032991//protein-containing complex	GO:0003676//nucleic acid binding;GO:0003723//RNA binding;GO:0004842//ubiquitin-protein transferase activity;GO:0005515//protein binding;GO:0008270//zinc ion binding;GO:0016740//transferase activity;GO:0019901//protein kinase binding;GO:0046872//metal ion binding;GO:0061630//ubiquitin protein ligase activity	GO:0001701//in utero embryonic development;GO:0006260//DNA replication;GO:0006275//regulation of DNA replication;GO:0006397//mRNA processing;GO:0006511//ubiquitin-dependent protein catabolic process;GO:0006974//cellular response to DNA damage stimulus;GO:0016567//protein ubiquitination;GO:0019538//protein metabolic process;GO:0035264//multicellular organism growth;GO:0048568//embryonic organ deve…	--
ENSG00000157625	-0.303961	0.0221514	0.999113	TAB3	TGF-beta activated kinase 1 (MAP3K7) binding protein 3 [Source:HGNC Symbol;Acc:HGNC:30681]	Human Diseases;Human Diseases;Human Diseases;Organismal Systems;Environmental Information Processing;Human Diseases;Environmental Information Processing;Organismal Systems	Infectious disease: bacterial;Infectious disease: bacterial;Infectious disease: bacterial;Immune system;Signal transduction;Endocrine and metabolic disease;Signal transduction;Immune system	ko05130//Pathogenic Escherichia coli infection;ko05132//Salmonella infection;ko05131//Shigellosis;ko04621//NOD-like receptor signaling pathway;ko04064//NF-kappa B signaling pathway;ko04936//Alcoholic liver disease;ko04668//TNF signaling pathway;ko04657//IL-17 signaling pathway	K12793;K12793;K12793;K12793;K12793;K12793;K12793;K12793	GO:0005829//cytosol;GO:0005886//plasma membrane;GO:0010008//endosome membrane;GO:0070062//extracellular exosome	GO:0005515//protein binding;GO:0008270//zinc ion binding;GO:0043130//ubiquitin binding;GO:0046872//metal ion binding;GO:0070530//K63-linked polyubiquitin modification-dependent protein binding	GO:0010507//negative regulation of autophagy;GO:0043123//positive regulation of I-kappaB kinase/NF-kappaB signaling	--
ENSG00000215712	-0.297288	0.0296671	0.999113	TMEM242	transmembrane protein 242 [Source:HGNC Symbol;Acc:HGNC:17206]	-	-	-	-	GO:0005739//mitochondrion;GO:0005743//mitochondrial inner membrane;GO:0016020//membrane	GO:0005515//protein binding	GO:0033615//mitochondrial proton-transporting ATP synthase complex assembly	--
ENSG00000162924	-0.29634	0.0284319	0.999113	REL	REL proto-oncogene, NF-kB subunit [Source:HGNC Symbol;Acc:HGNC:9954]	Human Diseases;Environmental Information Processing;Human Diseases;Organismal Systems	Cancer: overview;Signal transduction;Cancer: overview;Immune system	ko05202//Transcriptional misregulation in cancer;ko04014//Ras signaling pathway;ko05203//Viral carcinogenesis;ko04624//Toll and Imd signaling pathway	K09254;K09254;K09254;K09254	GO:0000785//chromatin;GO:0005634//nucleus;GO:0005654//nucleoplasm;GO:0005737//cytoplasm;GO:0005829//cytosol;GO:0071159//NF-kappaB complex	GO:0000978//RNA polymerase II cis-regulatory region sequence-specific DNA binding;GO:0000981//DNA-binding transcription factor activity, RNA polymerase II-specific;GO:0001228//DNA-binding transcription activator activity, RNA polymerase II-specific;GO:0003677//DNA binding;GO:0003700//DNA-binding transcription factor activity;GO:0005515//protein binding	GO:0006355//regulation of transcription, DNA-templated;GO:0006357//regulation of transcription by RNA polymerase II;GO:0006954//inflammatory response;GO:0007249//I-kappaB kinase/NF-kappaB signaling;GO:0010605//negative regulation of macromolecule metabolic process;GO:0010629//negative regulation of gene expression;GO:0032688//negative regulation of interferon-beta production;GO:0034097//response …	RHD
ENSG00000173281	-0.28862	0.0359212	0.999113	PPP1R3B	protein phosphatase 1 regulatory subunit 3B [Source:HGNC Symbol;Acc:HGNC:14942]	Organismal Systems;Human Diseases	Endocrine system;Endocrine and metabolic disease	ko04910//Insulin signaling pathway;ko04931//Insulin resistance	K07189;K07189	GO:0000164//protein phosphatase type 1 complex;GO:0042587//glycogen granule;GO:0043231//intracellular membrane-bounded organelle	GO:0004721//phosphoprotein phosphatase activity;GO:0005515//protein binding;GO:0008157//protein phosphatase 1 binding;GO:0019888//protein phosphatase regulator activity;GO:0019899//enzyme binding;GO:0050196//[phosphorylase] phosphatase activity;GO:2001069//glycogen binding	GO:0005975//carbohydrate metabolic process;GO:0005977//glycogen metabolic process;GO:0005979//regulation of glycogen biosynthetic process;GO:0005981//regulation of glycogen catabolic process	--
ENSG00000079482	-0.286354	0.0437517	0.999113	OPHN1	oligophrenin 1 [Source:HGNC Symbol;Acc:HGNC:8148]	-	-	-	-	GO:0005737//cytoplasm;GO:0015629//actin cytoskeleton;GO:0030424//axon;GO:0030425//dendrite;GO:0042995//cell projection;GO:0043195//terminal bouton;GO:0043197//dendritic spine;GO:0045202//synapse;GO:0098793//presynapse;GO:0098794//postsynapse;GO:0098978//glutamatergic synapse	GO:0003779//actin binding;GO:0005096//GTPase activator activity;GO:0005543//phospholipid binding;GO:0035255//ionotropic glutamate receptor binding	GO:0006897//endocytosis;GO:0006930//substrate-dependent cell migration, cell extension;GO:0007165//signal transduction;GO:0007399//nervous system development;GO:0007411//axon guidance;GO:0021707//cerebellar granule cell differentiation;GO:0021895//cerebral cortex neuron differentiation;GO:0030036//actin cytoskeleton organization;GO:0030100//regulation of endocytosis;GO:0030182//neuron differentia…	--
ENSG00000163659	-0.276022	0.0496929	0.999113	TIPARP	TCDD inducible poly(ADP-ribose) polymerase [Source:HGNC Symbol;Acc:HGNC:23696]	-	-	-	-	GO:0005634//nucleus	GO:0000987//cis-regulatory region sequence-specific DNA binding;GO:0003950//NAD+ ADP-ribosyltransferase activity;GO:0016740//transferase activity;GO:0016757//glycosyltransferase activity;GO:0016779//nucleotidyltransferase activity;GO:0046872//metal ion binding;GO:1990404//protein ADP-ribosylase activity	GO:0001570//vasculogenesis;GO:0001822//kidney development;GO:0006807//nitrogen compound metabolic process;GO:0008209//androgen metabolic process;GO:0008210//estrogen metabolic process;GO:0008585//female gonad development;GO:0009791//post-embryonic development;GO:0010629//negative regulation of gene expression;GO:0030097//hemopoiesis;GO:0045732//positive regulation of protein catabolic process;GO:…	--
ENSG00000158615	-0.271992	0.024328	0.999113	PPP1R15B	protein phosphatase 1 regulatory subunit 15B [Source:HGNC Symbol;Acc:HGNC:14951]	-	-	-	-	GO:0000164//protein phosphatase type 1 complex;GO:0005737//cytoplasm;GO:0005783//endoplasmic reticulum	GO:0005515//protein binding;GO:0019888//protein phosphatase regulator activity	GO:0001933//negative regulation of protein phosphorylation;GO:0006417//regulation of translation;GO:0006979//response to oxidative stress;GO:0006983//ER overload response;GO:0031400//negative regulation of protein modification process;GO:0032516//positive regulation of phosphoprotein phosphatase activity;GO:0034976//response to endoplasmic reticulum stress;GO:0042542//response to hydrogen peroxid…	--
ENSG00000123124	-0.269267	0.0395594	0.999113	WWP1	WW domain containing E3 ubiquitin protein ligase 1 [Source:HGNC Symbol;Acc:HGNC:17004]	Cellular Processes;Genetic Information Processing	Transport and catabolism;Folding, sorting and degradation	ko04144//Endocytosis;ko04120//Ubiquitin mediated proteolysis	K05633;K05633	GO:0000151//ubiquitin ligase complex;GO:0005634//nucleus;GO:0005737//cytoplasm;GO:0005829//cytosol;GO:0005886//plasma membrane;GO:0016020//membrane;GO:0070062//extracellular exosome	GO:0004842//ubiquitin-protein transferase activity;GO:0005515//protein binding;GO:0016740//transferase activity;GO:0061630//ubiquitin protein ligase activity	GO:0000209//protein polyubiquitination;GO:0006511//ubiquitin-dependent protein catabolic process;GO:0007165//signal transduction;GO:0007417//central nervous system development;GO:0016567//protein ubiquitination;GO:0034220//ion transmembrane transport;GO:0043161//proteasome-mediated ubiquitin-dependent protein catabolic process;GO:0045892//negative regulation of transcription, DNA-templated;GO:004…	--
ENSG00000104343	-0.259796	0.0359551	0.999113	UBE2W	ubiquitin conjugating enzyme E2 W [Source:HGNC Symbol;Acc:HGNC:25616]	Genetic Information Processing	Folding, sorting and degradation	ko04120//Ubiquitin mediated proteolysis	K10688	GO:0005634//nucleus;GO:0005654//nucleoplasm;GO:0016020//membrane	GO:0000166//nucleotide binding;GO:0004842//ubiquitin-protein transferase activity;GO:0005515//protein binding;GO:0005524//ATP binding;GO:0016740//transferase activity;GO:0031625//ubiquitin protein ligase binding;GO:0061631//ubiquitin conjugating enzyme activity	GO:0000209//protein polyubiquitination;GO:0006281//DNA repair;GO:0006513//protein monoubiquitination;GO:0006515//protein quality control for misfolded or incompletely synthesized proteins;GO:0006974//cellular response to DNA damage stimulus;GO:0016567//protein ubiquitination;GO:0043161//proteasome-mediated ubiquitin-dependent protein catabolic process;GO:0070979//protein K11-linked ubiquitination…	--
ENSG00000198408	-0.254425	0.0113214	0.999113	OGA	O-GlcNAcase [Source:HGNC Symbol;Acc:HGNC:7056]	Human Diseases	Endocrine and metabolic disease	ko04931//Insulin resistance	K15719	GO:0005634//nucleus;GO:0005737//cytoplasm;GO:0005829//cytosol;GO:0016020//membrane	GO:0004415//hyalurononglucosaminidase activity;GO:0016231//beta-N-acetylglucosaminidase activity;GO:0016787//hydrolase activity;GO:0016798//hydrolase activity, acting on glycosyl bonds;GO:0042802//identical protein binding;GO:0102166//[protein]-3-O-(N-acetyl-D-glucosaminyl)-L-threonine O-N-acetyl-alpha-D-glucosaminase activity;GO:0102167//[protein]-3-O-(N-acetyl-D-glucosaminyl)-L-serine O-N-acety…	GO:0006044//N-acetylglucosamine metabolic process;GO:0006493//protein O-linked glycosylation;GO:0006516//glycoprotein catabolic process;GO:0006517//protein deglycosylation;GO:0008152//metabolic process;GO:0009100//glycoprotein metabolic process;GO:0036211//protein modification process	--
ENSG00000164930	-0.248818	0.0484192	0.999113	FZD6	frizzled class receptor 6 [Source:HGNC Symbol;Acc:HGNC:4044]	Human Diseases;Human Diseases;Human Diseases;Human Diseases;Human Diseases;Environmental Information Processing;Human Diseases;Environmental Information Processing;Human Diseases;Environmental Information Processing;Human Diseases;Human Diseases;Cellular Processes;Organismal Systems;Human Diseases	Cancer: overview;Neurodegenerative disease;Neurodegenerative disease;Infectious disease: viral;Cancer: overview;Signal transduction;Cancer: specific types;Signal transduction;Endocrine and metabolic disease;Signal transduction;Cancer: specific types;Cancer: specific types;Cellular community - eukaryotes;Endocrine system;Cancer: specific types	ko05200//Pathways in cancer;ko05022//Pathways of neurodegeneration - multiple diseases;ko05010//Alzheimer disease;ko05165//Human papillomavirus infection;ko05205//Proteoglycans in cancer;ko04310//Wnt signaling pathway;ko05225//Hepatocellular carcinoma;ko04150//mTOR signaling pathway;ko04934//Cushing syndrome;ko04390//Hippo signaling pathway;ko05224//Breast cancer;ko05226//Gastric cancer;ko04550//…	K02376;K02376;K02376;K02376;K02376;K02376;K02376;K02376;K02376;K02376;K02376;K02376;K02376;K02376;K02376	GO:0005783//endoplasmic reticulum;GO:0005789//endoplasmic reticulum membrane;GO:0005886//plasma membrane;GO:0009986//cell surface;GO:0016020//membrane;GO:0016021//integral component of membrane;GO:0016324//apical plasma membrane;GO:0016327//apicolateral plasma membrane;GO:0030659//cytoplasmic vesicle membrane;GO:0031410//cytoplasmic vesicle;GO:0045177//apical part of cell	GO:0004888//transmembrane signaling receptor activity;GO:0004930//G protein-coupled receptor activity;GO:0005515//protein binding;GO:0017147//Wnt-protein binding;GO:0031625//ubiquitin protein ligase binding;GO:0042813//Wnt-activated receptor activity	GO:0001736//establishment of planar polarity;GO:0001843//neural tube closure;GO:0001942//hair follicle development;GO:0007165//signal transduction;GO:0007166//cell surface receptor signaling pathway;GO:0007186//G protein-coupled receptor signaling pathway;GO:0016055//Wnt signaling pathway;GO:0030168//platelet activation;GO:0030901//midbrain development;GO:0033278//cell proliferation in midbrain;G…	--
ENSG00000052126	-0.246812	0.0431621	0.999113	PLEKHA5	pleckstrin homology domain containing A5 [Source:HGNC Symbol;Acc:HGNC:30036]	-	-	-	-	GO:0005654//nucleoplasm;GO:0005737//cytoplasm;GO:0005829//cytosol;GO:0014069//postsynaptic density;GO:0016020//membrane;GO:0098978//glutamatergic synapse	GO:0005515//protein binding;GO:0010314//phosphatidylinositol-5-phosphate binding;GO:0032266//phosphatidylinositol-3-phosphate binding;GO:0070273//phosphatidylinositol-4-phosphate binding;GO:0080025//phosphatidylinositol-3,5-bisphosphate binding	GO:0008150//biological_process;GO:0061458//reproductive system development	--
ENSG00000114904	-0.230353	0.040161	0.999113	NEK4	NIMA related kinase 4 [Source:HGNC Symbol;Acc:HGNC:11399]	-	-	-	-	GO:0005737//cytoplasm;GO:0005829//cytosol;GO:0005929//cilium;GO:0042995//cell projection	GO:0000166//nucleotide binding;GO:0004672//protein kinase activity;GO:0004674//protein serine/threonine kinase activity;GO:0005524//ATP binding;GO:0016301//kinase activity;GO:0016740//transferase activity;GO:0030145//manganese ion binding;GO:0046872//metal ion binding;GO:0106310//protein serine kinase activity	GO:0000278//mitotic cell cycle;GO:0006468//protein phosphorylation;GO:0006974//cellular response to DNA damage stimulus;GO:0007049//cell cycle;GO:0016310//phosphorylation;GO:0045893//positive regulation of transcription, DNA-templated;GO:0051301//cell division;GO:2000772//regulation of cellular senescence;GO:2001020//regulation of response to DNA damage stimulus	--
ENSG00000111237	-0.220278	0.0383232	0.999113	VPS29	VPS29 retromer complex component [Source:HGNC Symbol;Acc:HGNC:14340]	Cellular Processes	Transport and catabolism	ko04144//Endocytosis	K18467	GO:0005737//cytoplasm;GO:0005768//endosome;GO:0005769//early endosome;GO:0005770//late endosome;GO:0005829//cytosol;GO:0010008//endosome membrane;GO:0016020//membrane;GO:0030904//retromer complex;GO:0030906//retromer, cargo-selective complex;GO:0043231//intracellular membrane-bounded organelle;GO:0110165//cellular anatomical entity	GO:0005515//protein binding;GO:0046872//metal ion binding	GO:0006886//intracellular protein transport;GO:0015031//protein transport;GO:0032456//endocytic recycling;GO:0042147//retrograde transport, endosome to Golgi	--
ENSG00000144744	-0.208795	0.0320969	0.999113	UBA3	ubiquitin like modifier activating enzyme 3 [Source:HGNC Symbol;Acc:HGNC:12470]	Genetic Information Processing	Folding, sorting and degradation	ko04120//Ubiquitin mediated proteolysis	K10686	GO:0005634//nucleus;GO:0005737//cytoplasm;GO:0005829//cytosol;GO:0032991//protein-containing complex	GO:0000166//nucleotide binding;GO:0005515//protein binding;GO:0005524//ATP binding;GO:0008641//ubiquitin-like modifier activating enzyme activity;GO:0016874//ligase activity;GO:0019781//NEDD8 activating enzyme activity;GO:0019788//NEDD8 transferase activity;GO:0042802//identical protein binding;GO:0046982//protein heterodimerization activity	GO:0000278//mitotic cell cycle;GO:0006508//proteolysis;GO:0007049//cell cycle;GO:0007113//endomitotic cell cycle;GO:0032446//protein modification by small protein conjugation;GO:0036211//protein modification process;GO:0043687//post-translational protein modification;GO:0045116//protein neddylation;GO:0051726//regulation of cell cycle	--
ENSG00000107372	-0.205938	0.0381102	0.999113	ZFAND5	zinc finger AN1-type containing 5 [Source:HGNC Symbol;Acc:HGNC:13008]	-	-	-	-	GO:0005575//cellular_component;GO:0005737//cytoplasm	GO:0003674//molecular_function;GO:0003677//DNA binding;GO:0005515//protein binding;GO:0008270//zinc ion binding;GO:0046872//metal ion binding	GO:0001701//in utero embryonic development;GO:0001944//vasculature development;GO:0003016//respiratory system process;GO:0008150//biological_process;GO:0010761//fibroblast migration;GO:0048008//platelet-derived growth factor receptor signaling pathway;GO:0048705//skeletal system morphogenesis;GO:0048745//smooth muscle tissue development;GO:0060324//face development	--
ENSG00000157168	-0.170749	0.0425199	0.999113	NRG1	neuregulin 1 [Source:HGNC Symbol;Acc:HGNC:7997]	Human Diseases;Environmental Information Processing;Human Diseases	Neurodegenerative disease;Signal transduction;Drug resistance: antineoplastic	ko05014//Amyotrophic lateral sclerosis;ko04012//ErbB signaling pathway;ko01521//EGFR tyrosine kinase inhibitor resistance	K05455;K05455;K05455	GO:0005576//extracellular region;GO:0005615//extracellular space;GO:0005634//nucleus;GO:0005654//nucleoplasm;GO:0005886//plasma membrane;GO:0016020//membrane;GO:0016324//apical plasma membrane;GO:0098978//glutamatergic synapse;GO:0110165//cellular anatomical entity	GO:0003712//transcription coregulator activity;GO:0005102//signaling receptor binding;GO:0005125//cytokine activity;GO:0005178//integrin binding;GO:0005515//protein binding;GO:0008083//growth factor activity;GO:0030296//protein tyrosine kinase activator activity;GO:0030297//transmembrane receptor protein tyrosine kinase activator activity;GO:0030971//receptor tyrosine kinase binding;GO:0043125//E…	GO:0003222//ventricular trabecula myocardium morphogenesis;GO:0006351//transcription, DNA-templated;GO:0007154//cell communication;GO:0007165//signal transduction;GO:0007169//transmembrane receptor protein tyrosine kinase signaling pathway;GO:0007171//activation of transmembrane receptor protein tyrosine kinase activity;GO:0007399//nervous system development;GO:0008283//cell population proliferat…	--
ENSG00000171621	-0.157967	0.0324414	0.999113	SPSB1	splA/ryanodine receptor domain and SOCS box containing 1 [Source:HGNC Symbol;Acc:HGNC:30628]	-	-	-	-	GO:0005737//cytoplasm;GO:0005829//cytosol;GO:0019005//SCF ubiquitin ligase complex	GO:0005515//protein binding;GO:1990756//ubiquitin ligase-substrate adaptor activity	GO:0006511//ubiquitin-dependent protein catabolic process;GO:0016567//protein ubiquitination;GO:0043161//proteasome-mediated ubiquitin-dependent protein catabolic process	--
ENSG00000104660	-0.0831518	0.0333416	0.999113	LEPROTL1	leptin receptor overlapping transcript like 1 [Source:HGNC Symbol;Acc:HGNC:6555]	-	-	-	-	GO:0005768//endosome;GO:0016020//membrane	GO:0005515//protein binding;GO:0042802//identical protein binding	GO:0032511//late endosome to vacuole transport via multivesicular body sorting pathway;GO:0060400//negative regulation of growth hormone receptor signaling pathway	--
ENSG00000173559	-0.0426274	0.0206852	0.999113	NABP1	nucleic acid binding protein 1 [Source:HGNC Symbol;Acc:HGNC:26232]	-	-	-	-	GO:0000781//chromosome, telomeric region;GO:0005634//nucleus;GO:0005654//nucleoplasm;GO:0005829//cytosol;GO:0035861//site of double-strand break;GO:0070876//SOSS complex	GO:0003677//DNA binding;GO:0003697//single-stranded DNA binding;GO:0003723//RNA binding;GO:0005515//protein binding	GO:0000724//double-strand break repair via homologous recombination;GO:0006281//DNA repair;GO:0006974//cellular response to DNA damage stimulus;GO:0010212//response to ionizing radiation;GO:0044818//mitotic G2/M transition checkpoint	--
ENSG00000172780	-0.0031866	0.0221533	0.999113	RAB43	RAB43, member RAS oncogene family [Source:HGNC Symbol;Acc:HGNC:19983]	-	-	-	-	GO:0005794//Golgi apparatus;GO:0012505//endomembrane system;GO:0016020//membrane;GO:0030670//phagocytic vesicle membrane;GO:0031410//cytoplasmic vesicle;GO:0032588//trans-Golgi network membrane;GO:0045335//phagocytic vesicle;GO:0070062//extracellular exosome	GO:0000166//nucleotide binding;GO:0003924//GTPase activity;GO:0005515//protein binding;GO:0005525//GTP binding	GO:0000045//autophagosome assembly;GO:0006886//intracellular protein transport;GO:0007030//Golgi organization;GO:0019068//virion assembly;GO:0035526//retrograde transport, plasma membrane to Golgi;GO:0071346//cellular response to interferon-gamma;GO:0090382//phagosome maturation;GO:1901998//toxin transport	--
ENSG00000179409	0.160931	0.0443861	0.999113	GEMIN4	gem nuclear organelle associated protein 4 [Source:HGNC Symbol;Acc:HGNC:15717]	-	-	-	-	GO:0005634//nucleus;GO:0005654//nucleoplasm;GO:0005730//nucleolus;GO:0005737//cytoplasm;GO:0005829//cytosol;GO:0015030//Cajal body;GO:0016020//membrane;GO:0016604//nuclear body;GO:0030532//small nuclear ribonucleoprotein complex;GO:0032797//SMN complex;GO:0034719//SMN-Sm protein complex;GO:0070062//extracellular exosome;GO:0097504//Gemini of coiled bodies	GO:0005515//protein binding;GO:0043021//ribonucleoprotein complex binding	GO:0000387//spliceosomal snRNP assembly;GO:0006364//rRNA processing;GO:0006397//mRNA processing;GO:0008380//RNA splicing	--
ENSG00000240445	0.175194	0.0494363	0.999113	FOXO3B	forkhead box O3B [Source:HGNC Symbol;Acc:HGNC:3822]	Environmental Information Processing;Human Diseases;Human Diseases;Organismal Systems;Cellular Processes;Human Diseases;Environmental Information Processing;Organismal Systems;Environmental Information Processing;Organismal Systems;Organismal Systems;Organismal Systems;Human Diseases;Organismal Systems;Human Diseases;Cellular Processes;Organismal Systems;Human Diseases	Signal transduction;Infectious disease: bacterial;Cancer: overview;Immune system;Cell growth and death;Endocrine and metabolic disease;Signal transduction;Nervous system;Signal transduction;Development and regeneration;Aging;Aging;Drug resistance: antineoplastic;Endocrine system;Cancer: specific types;Transport and catabolism;Aging;Cancer: specific types	ko04151//PI3K-Akt signaling pathway;ko05131//Shigellosis;ko05208//Chemical carcinogenesis - reactive oxygen species;ko04062//Chemokine signaling pathway;ko04218//Cellular senescence;ko04936//Alcoholic liver disease;ko04068//FoxO signaling pathway;ko04722//Neurotrophin signaling pathway;ko04152//AMPK signaling pathway;ko04361//Axon regeneration;ko04211//Longevity regulating pathway;ko04212//Longev…	K09408;K09408;K09408;K09408;K09408;K09408;K09408;K09408;K09408;K09408;K09408;K09408;K09408;K09408;K09408;K09408;K09408;K09408	GO:0005737//cytoplasm;GO:0005829//cytosol	GO:0003677//DNA binding;GO:0003700//DNA-binding transcription factor activity;GO:0043565//sequence-specific DNA binding	GO:0006355//regulation of transcription, DNA-templated	--
ENSG00000120725	0.228912	0.0458031	0.999113	SIL1	SIL1 nucleotide exchange factor [Source:HGNC Symbol;Acc:HGNC:24624]	Genetic Information Processing	Folding, sorting and degradation	ko04141//Protein processing in endoplasmic reticulum	K14001	GO:0005615//extracellular space;GO:0005783//endoplasmic reticulum;GO:0005788//endoplasmic reticulum lumen	GO:0000774//adenyl-nucleotide exchange factor activity;GO:0005515//protein binding;GO:0042802//identical protein binding;GO:0051082//unfolded protein binding	GO:0006457//protein folding;GO:0006613//cotranslational protein targeting to membrane;GO:0006886//intracellular protein transport;GO:0015031//protein transport	--
ENSG00000092098	0.229147	0.04785	0.999113	RNF31	ring finger protein 31 [Source:HGNC Symbol;Acc:HGNC:16031]	Human Diseases;Organismal Systems;Cellular Processes	Infectious disease: bacterial;Immune system;Cell growth and death	ko05131//Shigellosis;ko04621//NOD-like receptor signaling pathway;ko04217//Necroptosis	K11974;K11974;K11974	GO:0005737//cytoplasm;GO:0005829//cytosol;GO:0009898//cytoplasmic side of plasma membrane;GO:0035631//CD40 receptor complex;GO:0071797//LUBAC complex	GO:0004842//ubiquitin-protein transferase activity;GO:0005515//protein binding;GO:0016740//transferase activity;GO:0031625//ubiquitin protein ligase binding;GO:0036435//K48-linked polyubiquitin modification-dependent protein binding;GO:0042802//identical protein binding;GO:0043130//ubiquitin binding;GO:0046872//metal ion binding;GO:0061630//ubiquitin protein ligase activity;GO:0070530//K63-linked…	GO:0000209//protein polyubiquitination;GO:0016567//protein ubiquitination;GO:0023035//CD40 signaling pathway;GO:0042742//defense response to bacterium;GO:0043123//positive regulation of I-kappaB kinase/NF-kappaB signaling;GO:0050852//T cell receptor signaling pathway;GO:0051092//positive regulation of NF-kappaB transcription factor activity;GO:0060546//negative regulation of necroptotic process;G…	--
ENSG00000104980	0.251019	0.0424426	0.999113	TIMM44	translocase of inner mitochondrial membrane 44 [Source:HGNC Symbol;Acc:HGNC:17316]	-	-	-	-	GO:0001650//fibrillar center;GO:0005739//mitochondrion;GO:0005743//mitochondrial inner membrane;GO:0005744//TIM23 mitochondrial import inner membrane translocase complex;GO:0005759//mitochondrial matrix;GO:0016020//membrane	GO:0000166//nucleotide binding;GO:0005515//protein binding;GO:0005524//ATP binding;GO:0051087//chaperone binding	GO:0006626//protein targeting to mitochondrion;GO:0006886//intracellular protein transport;GO:0015031//protein transport;GO:0030150//protein import into mitochondrial matrix	--
ENSG00000242372	0.251561	0.0442362	0.999113	EIF6	eukaryotic translation initiation factor 6 [Source:HGNC Symbol;Acc:HGNC:6159]	Genetic Information Processing	Translation	ko03008//Ribosome biogenesis in eukaryotes	K03264	GO:0005634//nucleus;GO:0005638//lamin filament;GO:0005654//nucleoplasm;GO:0005730//nucleolus;GO:0005737//cytoplasm;GO:0005829//cytosol;GO:0005882//intermediate filament;GO:0030687//preribosome, large subunit precursor;GO:0045202//synapse;GO:0070062//extracellular exosome	GO:0003743//translation initiation factor activity;GO:0005515//protein binding;GO:0043022//ribosome binding;GO:0043023//ribosomal large subunit binding	GO:0000054//ribosomal subunit export from nucleus;GO:0000460//maturation of 5.8S rRNA;GO:0000470//maturation of LSU-rRNA;GO:0006110//regulation of glycolytic process;GO:0006412//translation;GO:0006413//translational initiation;GO:0032868//response to insulin;GO:0035195//gene silencing by miRNA;GO:0035278//miRNA mediated inhibition of translation;GO:0042254//ribosome biogenesis;GO:0042256//mature …	--
ENSG00000166173	0.256136	0.0145097	0.999113	LARP6	La ribonucleoprotein 6, translational regulator [Source:HGNC Symbol;Acc:HGNC:24012]	-	-	-	-	GO:0005634//nucleus;GO:0005737//cytoplasm;GO:0005844//polysome;GO:1990904//ribonucleoprotein complex	GO:0003676//nucleic acid binding;GO:0003723//RNA binding;GO:0003729//mRNA binding;GO:0005515//protein binding;GO:0017022//myosin binding;GO:0035613//RNA stem-loop binding;GO:0048027//mRNA 5'-UTR binding;GO:1990825//sequence-specific mRNA binding	GO:0006396//RNA processing;GO:0006417//regulation of translation;GO:0032967//positive regulation of collagen biosynthetic process;GO:0045727//positive regulation of translation;GO:1902416//positive regulation of mRNA binding	--
ENSG00000106266	0.256633	0.0466083	0.999113	SNX8	sorting nexin 8 [Source:HGNC Symbol;Acc:HGNC:14972]	-	-	-	-	GO:0005768//endosome;GO:0005829//cytosol;GO:0016020//membrane;GO:0030904//retromer complex;GO:0031410//cytoplasmic vesicle;GO:0031901//early endosome membrane;GO:0043231//intracellular membrane-bounded organelle	GO:0005515//protein binding;GO:0008289//lipid binding;GO:0035091//phosphatidylinositol binding;GO:0042802//identical protein binding	GO:0006886//intracellular protein transport;GO:0015031//protein transport;GO:0034498//early endosome to Golgi transport;GO:0042147//retrograde transport, endosome to Golgi;GO:0051641//cellular localization	--
ENSG00000125148	0.256799	0.036002	0.999113	MT2A	metallothionein 2A [Source:HGNC Symbol;Acc:HGNC:7406]	-	-	-	-	GO:0005634//nucleus;GO:0005737//cytoplasm;GO:0005829//cytosol	GO:0005515//protein binding;GO:0008270//zinc ion binding;GO:0046872//metal ion binding	GO:0006878//cellular copper ion homeostasis;GO:0006882//cellular zinc ion homeostasis;GO:0010273//detoxification of copper ion;GO:0036016//cellular response to interleukin-3;GO:0036018//cellular response to erythropoietin;GO:0045926//negative regulation of growth;GO:0071248//cellular response to metal ion;GO:0071276//cellular response to cadmium ion;GO:0071280//cellular response to copper ion;GO:…	--
ENSG00000157870	0.264697	0.0230847	0.999113	PRXL2B	peroxiredoxin like 2B [Source:HGNC Symbol;Acc:HGNC:28390]	Metabolism;Metabolism	Global and overview maps;Lipid metabolism	ko01100//Metabolic pathways;ko00590//Arachidonic acid metabolism	K15717;K15717	GO:0005737//cytoplasm;GO:0005783//endoplasmic reticulum;GO:0005829//cytosol;GO:0043209//myelin sheath;GO:0070062//extracellular exosome	GO:0005515//protein binding;GO:0016209//antioxidant activity;GO:0016491//oxidoreductase activity;GO:0016616//oxidoreductase activity, acting on the CH-OH group of donors, NAD or NADP as acceptor;GO:0047017//prostaglandin-F synthase activity	GO:0001516//prostaglandin biosynthetic process;GO:0006629//lipid metabolic process;GO:0006631//fatty acid metabolic process;GO:0006633//fatty acid biosynthetic process;GO:0006693//prostaglandin metabolic process;GO:0098869//cellular oxidant detoxification	--
ENSG00000130254	0.265626	0.0411716	0.999113	SAFB2	scaffold attachment factor B2 [Source:HGNC Symbol;Acc:HGNC:21605]	-	-	-	-	GO:0005634//nucleus;GO:0005654//nucleoplasm;GO:0005737//cytoplasm;GO:0016604//nuclear body;GO:0043231//intracellular membrane-bounded organelle;GO:0070062//extracellular exosome	GO:0003676//nucleic acid binding;GO:0003677//DNA binding;GO:0003723//RNA binding;GO:0005515//protein binding;GO:0042802//identical protein binding;GO:0043565//sequence-specific DNA binding	GO:0006355//regulation of transcription, DNA-templated;GO:0006357//regulation of transcription by RNA polymerase II;GO:0050684//regulation of mRNA processing;GO:0060008//Sertoli cell differentiation;GO:0060765//regulation of androgen receptor signaling pathway	--
ENSG00000167543	0.268471	0.0343469	0.999113	TP53I13	tumor protein p53 inducible protein 13 [Source:HGNC Symbol;Acc:HGNC:25102]	-	-	-	-	GO:0005737//cytoplasm;GO:0005886//plasma membrane;GO:0016020//membrane	GO:0003674//molecular_function;GO:0005515//protein binding	GO:0009410//response to xenobiotic stimulus;GO:0009411//response to UV;GO:0014070//response to organic cyclic compound;GO:0045786//negative regulation of cell cycle	--
ENSG00000184916	0.2757	0.042755	0.999113	JAG2	jagged canonical Notch ligand 2 [Source:HGNC Symbol;Acc:HGNC:6189]	Human Diseases;Human Diseases;Human Diseases;Organismal Systems;Environmental Information Processing	Cancer: overview;Cancer: specific types;Drug resistance: antineoplastic;Immune system;Signal transduction	ko05200//Pathways in cancer;ko05224//Breast cancer;ko01522//Endocrine resistance;ko04658//Th1 and Th2 cell differentiation;ko04330//Notch signaling pathway	K21635;K21635;K21635;K21635;K21635	GO:0005886//plasma membrane;GO:0016020//membrane;GO:0016021//integral component of membrane	GO:0005112//Notch binding;GO:0005509//calcium ion binding;GO:0005515//protein binding;GO:0008083//growth factor activity	GO:0001501//skeletal system development;GO:0001701//in utero embryonic development;GO:0003016//respiratory system process;GO:0007154//cell communication;GO:0007219//Notch signaling pathway;GO:0007275//multicellular organism development;GO:0007283//spermatogenesis;GO:0009912//auditory receptor cell fate commitment;GO:0016331//morphogenesis of embryonic epithelium;GO:0030154//cell differentiation;G…	--
ENSG00000090581	0.283614	0.0300376	0.999113	GNPTG	N-acetylglucosamine-1-phosphate transferase subunit gamma [Source:HGNC Symbol;Acc:HGNC:23026]	Cellular Processes	Transport and catabolism	ko04142//Lysosome	K10087	GO:0000139//Golgi membrane;GO:0005576//extracellular region;GO:0005794//Golgi apparatus;GO:0016020//membrane;GO:0043231//intracellular membrane-bounded organelle;GO:0070062//extracellular exosome;GO:0070622//UDP-N-acetylglucosamine-lysosomal-enzyme N-acetylglucosaminephosphotransferase complex	GO:0003976//UDP-N-acetylglucosamine-lysosomal-enzyme N-acetylglucosaminephosphotransferase activity;GO:0005515//protein binding;GO:0042803//protein homodimerization activity	GO:0016256//N-glycan processing to lysosome;GO:0046835//carbohydrate phosphorylation	--
ENSG00000149806	0.286785	0.0250403	0.999113	FAU	FAU ubiquitin like and ribosomal protein S30 fusion [Source:HGNC Symbol;Acc:HGNC:3597]	Human Diseases;Genetic Information Processing	Infectious disease: viral;Translation	ko05171//Coronavirus disease - COVID-19;ko03010//Ribosome	K02983;K02983	GO:0005615//extracellular space;GO:0005634//nucleus;GO:0005654//nucleoplasm;GO:0005737//cytoplasm;GO:0005829//cytosol;GO:0005840//ribosome;GO:0015935//small ribosomal subunit;GO:0022626//cytosolic ribosome;GO:0022627//cytosolic small ribosomal subunit;GO:1990904//ribonucleoprotein complex	GO:0003723//RNA binding;GO:0003735//structural constituent of ribosome;GO:0005515//protein binding	GO:0002181//cytoplasmic translation;GO:0002227//innate immune response in mucosa;GO:0006412//translation;GO:0019731//antibacterial humoral response;GO:0050830//defense response to Gram-positive bacterium;GO:0061844//antimicrobial humoral immune response mediated by antimicrobial peptide	--
ENSG00000169957	0.293911	0.035841	0.999113	ZNF768	zinc finger protein 768 [Source:HGNC Symbol;Acc:HGNC:26273]	Human Diseases	Infectious disease: viral	ko05168//Herpes simplex virus 1 infection	K09228	GO:0005634//nucleus;GO:0005694//chromosome	GO:0000977//RNA polymerase II transcription regulatory region sequence-specific DNA binding;GO:0000981//DNA-binding transcription factor activity, RNA polymerase II-specific;GO:0003677//DNA binding;GO:0003723//RNA binding;GO:0005515//protein binding;GO:0046872//metal ion binding;GO:1990837//sequence-specific double-stranded DNA binding	GO:0006357//regulation of transcription by RNA polymerase II;GO:0006366//transcription by RNA polymerase II	zf-C2H2
ENSG00000197905	0.300065	0.0479717	0.999113	TEAD4	TEA domain transcription factor 4 [Source:HGNC Symbol;Acc:HGNC:11717]	Environmental Information Processing;Environmental Information Processing;Environmental Information Processing	Signal transduction;Signal transduction;Signal transduction	ko04390//Hippo signaling pathway;ko04391//Hippo signaling pathway - fly;ko04392//Hippo signaling pathway - multiple species	K09448;K09448;K09448	GO:0000785//chromatin;GO:0005634//nucleus;GO:0005654//nucleoplasm;GO:0005667//transcription regulator complex;GO:0005737//cytoplasm;GO:0032993//protein-DNA complex	GO:0000978//RNA polymerase II cis-regulatory region sequence-specific DNA binding;GO:0000981//DNA-binding transcription factor activity, RNA polymerase II-specific;GO:0001228//DNA-binding transcription activator activity, RNA polymerase II-specific;GO:0003677//DNA binding;GO:0003700//DNA-binding transcription factor activity;GO:0005515//protein binding;GO:0043565//sequence-specific DNA binding	GO:0001501//skeletal system development;GO:0001701//in utero embryonic development;GO:0001708//cell fate specification;GO:0001825//blastocyst formation;GO:0001830//trophectodermal cell fate commitment;GO:0006351//transcription, DNA-templated;GO:0006355//regulation of transcription, DNA-templated;GO:0006357//regulation of transcription by RNA polymerase II;GO:0007517//muscle organ development;GO:0…	TEA
ENSG00000125503	0.301493	0.0424023	0.999113	PPP1R12C	protein phosphatase 1 regulatory subunit 12C [Source:HGNC Symbol;Acc:HGNC:14947]	Cellular Processes;Human Diseases;Cellular Processes;Organismal Systems;Organismal Systems	Cell motility;Cancer: overview;Cellular community - eukaryotes;Endocrine system;Circulatory system	ko04810//Regulation of actin cytoskeleton;ko05205//Proteoglycans in cancer;ko04510//Focal adhesion;ko04921//Oxytocin signaling pathway;ko04270//Vascular smooth muscle contraction	K17457;K17457;K17457;K17457;K17457	GO:0005737//cytoplasm;GO:0005856//cytoskeleton	GO:0004857//enzyme inhibitor activity;GO:0005515//protein binding;GO:0019208//phosphatase regulator activity;GO:0019901//protein kinase binding	GO:0007165//signal transduction	--
ENSG00000198720	0.30615	0.0110346	0.999113	ANKRD13B	ankyrin repeat domain 13B [Source:HGNC Symbol;Acc:HGNC:26363]	-	-	-	-	GO:0005737//cytoplasm;GO:0005768//endosome;GO:0005769//early endosome;GO:0005770//late endosome;GO:0005886//plasma membrane;GO:0016020//membrane;GO:0043231//intracellular membrane-bounded organelle;GO:0048471//perinuclear region of cytoplasm	GO:0005515//protein binding;GO:0140036//ubiquitin-dependent protein binding	GO:0002091//negative regulation of receptor internalization	--
ENSG00000105402	0.309037	0.0446438	0.999113	NAPA	NSF attachment protein alpha [Source:HGNC Symbol;Acc:HGNC:7641]	Organismal Systems	Nervous system	ko04721//Synaptic vesicle cycle	K15296	GO:0005829//cytosol;GO:0005886//plasma membrane;GO:0016020//membrane;GO:0031201//SNARE complex;GO:0070044//synaptobrevin 2-SNAP-25-syntaxin-1a complex;GO:0070062//extracellular exosome;GO:0098793//presynapse;GO:0098978//glutamatergic synapse	GO:0000149//SNARE binding;GO:0005483//soluble NSF attachment protein activity;GO:0005515//protein binding;GO:0019905//syntaxin binding;GO:0044877//protein-containing complex binding	GO:0006886//intracellular protein transport;GO:0006891//intra-Golgi vesicle-mediated transport;GO:0007420//brain development;GO:0010807//regulation of synaptic vesicle priming;GO:0015031//protein transport;GO:0016082//synaptic vesicle priming;GO:0016192//vesicle-mediated transport;GO:0030182//neuron differentiation;GO:0035249//synaptic transmission, glutamatergic;GO:0035494//SNARE complex disasse…	--
ENSG00000165689	0.309184	0.0383616	0.999113	ENTR1	endosome associated trafficking regulator 1 [Source:HGNC Symbol;Acc:HGNC:10667]	-	-	-	-	GO:0005737//cytoplasm;GO:0005768//endosome;GO:0005769//early endosome;GO:0005813//centrosome;GO:0005815//microtubule organizing center;GO:0005856//cytoskeleton;GO:0030496//midbody;GO:0030904//retromer complex;GO:0036064//ciliary basal body;GO:0042995//cell projection;GO:0055037//recycling endosome	GO:0005515//protein binding	GO:0007049//cell cycle;GO:0015031//protein transport;GO:0030030//cell projection organization;GO:0032456//endocytic recycling;GO:0032465//regulation of cytokinesis;GO:0045724//positive regulation of cilium assembly;GO:0051301//cell division;GO:1903566//positive regulation of protein localization to cilium	--
ENSG00000106305	0.309625	0.0359077	0.999113	AIMP2	aminoacyl tRNA synthetase complex interacting multifunctional protein 2 [Source:HGNC Symbol;Acc:HGNC:20609]	-	-	-	-	GO:0005634//nucleus;GO:0005737//cytoplasm;GO:0005829//cytosol;GO:0016020//membrane;GO:0017101//aminoacyl-tRNA synthetase multienzyme complex	GO:0005515//protein binding;GO:0060090//molecular adaptor activity	GO:0006412//translation;GO:0006915//apoptotic process;GO:0008285//negative regulation of cell population proliferation;GO:0016567//protein ubiquitination;GO:0030154//cell differentiation;GO:0031398//positive regulation of protein ubiquitination;GO:0060510//type II pneumocyte differentiation;GO:0065003//protein-containing complex assembly;GO:1901216//positive regulation of neuron death;GO:1903632/…	--
ENSG00000100304	0.310684	0.0172976	0.999113	TTLL12	tubulin tyrosine ligase like 12 [Source:HGNC Symbol;Acc:HGNC:28974]	-	-	-	-	GO:0005634//nucleus;GO:0005737//cytoplasm;GO:0005815//microtubule organizing center;GO:0005819//spindle;GO:0005856//cytoskeleton;GO:0030496//midbody	GO:0000166//nucleotide binding;GO:0005515//protein binding;GO:0005524//ATP binding;GO:0015631//tubulin binding;GO:0016874//ligase activity;GO:1990889//H4K20me3 modified histone binding	GO:0002376//immune system process;GO:0007346//regulation of mitotic cell cycle;GO:0036211//protein modification process;GO:0045087//innate immune response;GO:0060339//negative regulation of type I interferon-mediated signaling pathway	--
ENSG00000186501	0.33736	0.0457586	0.999113	TMEM222	transmembrane protein 222 [Source:HGNC Symbol;Acc:HGNC:25363]	-	-	-	-	GO:0016020//membrane;GO:0030425//dendrite;GO:0042995//cell projection	GO:0005515//protein binding	-	--
ENSG00000144785	0.343121	0.0196228	0.999113	CNPY2	novel protein	-	-	-	-	GO:0005783//endoplasmic reticulum	-	-	--
ENSG00000261236	0.344923	0.0390166	0.999113	BOP1	BOP1 ribosomal biogenesis factor [Source:HGNC Symbol;Acc:HGNC:15519]	-	-	-	-	GO:0005634//nucleus;GO:0005654//nucleoplasm;GO:0005694//chromosome;GO:0005730//nucleolus;GO:0030687//preribosome, large subunit precursor;GO:0070545//PeBoW complex;GO:1990904//ribonucleoprotein complex	GO:0003723//RNA binding;GO:0005515//protein binding;GO:0043021//ribonucleoprotein complex binding	GO:0000027//ribosomal large subunit assembly;GO:0000448//cleavage in ITS2 between 5.8S rRNA and LSU-rRNA of tricistronic rRNA transcript (SSU-rRNA, 5.8S rRNA, LSU-rRNA);GO:0000463//maturation of LSU-rRNA from tricistronic rRNA transcript (SSU-rRNA, 5.8S rRNA, LSU-rRNA);GO:0000466//maturation of 5.8S rRNA from tricistronic rRNA transcript (SSU-rRNA, 5.8S rRNA, LSU-rRNA);GO:0006364//rRNA processing…	--
ENSG00000023191	0.348735	0.0223007	0.999113	RNH1	ribonuclease/angiogenin inhibitor 1 [Source:HGNC Symbol;Acc:HGNC:10074]	-	-	-	-	GO:0005654//nucleoplasm;GO:0005737//cytoplasm;GO:0005829//cytosol;GO:0032311//angiogenin-PRI complex;GO:0070062//extracellular exosome	GO:0005515//protein binding;GO:0008428//ribonuclease inhibitor activity	GO:0006402//mRNA catabolic process;GO:0045765//regulation of angiogenesis	--
ENSG00000132773	0.355119	0.0447321	0.999113	TOE1	target of EGR1, exonuclease [Source:HGNC Symbol;Acc:HGNC:15954]	-	-	-	-	GO:0005634//nucleus;GO:0005654//nucleoplasm;GO:0005730//nucleolus;GO:0005737//cytoplasm;GO:0015030//Cajal body;GO:0016604//nuclear body;GO:0016607//nuclear speck	GO:0000175//3'-5'-exoribonuclease activity;GO:0003676//nucleic acid binding;GO:0003723//RNA binding;GO:0004535//poly(A)-specific ribonuclease activity;GO:0005515//protein binding;GO:0017069//snRNA binding;GO:0046872//metal ion binding	GO:0034472//snRNA 3'-end processing;GO:0090503//RNA phosphodiester bond hydrolysis, exonucleolytic	--
ENSG00000167513	0.360066	0.0446945	0.999113	CDT1	chromatin licensing and DNA replication factor 1 [Source:HGNC Symbol;Acc:HGNC:24576]	-	-	-	-	GO:0000775//chromosome, centromeric region;GO:0000776//kinetochore;GO:0005634//nucleus;GO:0005654//nucleoplasm;GO:0005694//chromosome;GO:0016604//nuclear body	GO:0003677//DNA binding;GO:0003682//chromatin binding;GO:0005515//protein binding;GO:0070182//DNA polymerase binding	GO:0000076//DNA replication checkpoint signaling;GO:0000278//mitotic cell cycle;GO:0006260//DNA replication;GO:0007049//cell cycle;GO:0007059//chromosome segregation;GO:0030174//regulation of DNA-dependent DNA replication initiation;GO:0031334//positive regulation of protein-containing complex assembly;GO:0033044//regulation of chromosome organization;GO:0033262//regulation of nuclear cell cycle …	--
ENSG00000160959	0.360419	0.00447486	0.999113	LRRC14	leucine rich repeat containing 14 [Source:HGNC Symbol;Acc:HGNC:20419]	-	-	-	-	GO:0005737//cytoplasm;GO:0005829//cytosol	GO:0005515//protein binding;GO:0019900//kinase binding	GO:0032088//negative regulation of NF-kappaB transcription factor activity;GO:0034122//negative regulation of toll-like receptor signaling pathway	--
ENSG00000167815	0.364562	0.0477296	0.999113	PRDX2	peroxiredoxin 2 [Source:HGNC Symbol;Acc:HGNC:9353]	Cellular Processes	Cell growth and death	ko04214//Apoptosis - fly	K03386	GO:0005737//cytoplasm;GO:0005829//cytosol;GO:0070062//extracellular exosome	GO:0004601//peroxidase activity;GO:0005515//protein binding;GO:0008379//thioredoxin peroxidase activity;GO:0016209//antioxidant activity;GO:0016491//oxidoreductase activity;GO:0051920//peroxiredoxin activity	GO:0002357//defense response to tumor cell;GO:0002536//respiratory burst involved in inflammatory response;GO:0006979//response to oxidative stress;GO:0010310//regulation of hydrogen peroxide metabolic process;GO:0019430//removal of superoxide radicals;GO:0030194//positive regulation of blood coagulation;GO:0031665//negative regulation of lipopolysaccharide-mediated signaling pathway;GO:0032088//…	--
ENSG00000103168	0.371674	0.0473214	0.999113	TAF1C	TATA-box binding protein associated factor, RNA polymerase I subunit C [Source:HGNC Symbol;Acc:HGNC:11534]	-	-	-	-	GO:0001650//fibrillar center;GO:0005634//nucleus;GO:0005654//nucleoplasm;GO:0005668//RNA polymerase transcription factor SL1 complex;GO:0005730//nucleolus	GO:0001164//RNA polymerase I core promoter sequence-specific DNA binding;GO:0001181//RNA polymerase I general transcription initiation factor activity;GO:0003677//DNA binding;GO:0005515//protein binding	GO:0001188//RNA polymerase I preinitiation complex assembly;GO:0006360//transcription by RNA polymerase I;GO:0006361//transcription initiation from RNA polymerase I promoter;GO:0006366//transcription by RNA polymerase II	--
ENSG00000246705	0.376431	0.0372694	0.999113	H2AJ	H2A.J histone [Source:HGNC Symbol;Acc:HGNC:14456]	Organismal Systems;Human Diseases;Human Diseases;Cellular Processes	Immune system;Immune disease;Substance dependence;Cell growth and death	ko04613//Neutrophil extracellular trap formation;ko05322//Systemic lupus erythematosus;ko05034//Alcoholism;ko04217//Necroptosis	K11251;K11251;K11251;K11251	GO:0000786//nucleosome;GO:0005634//nucleus;GO:0005694//chromosome;GO:0043229//intracellular organelle;GO:0070062//extracellular exosome	GO:0003674//molecular_function;GO:0003677//DNA binding;GO:0030527//structural constituent of chromatin;GO:0046982//protein heterodimerization activity	GO:0008150//biological_process	--
ENSG00000066230	0.38393	0.0406652	0.999113	SLC9A3	solute carrier family 9 member A3 [Source:HGNC Symbol;Acc:HGNC:11073]	Organismal Systems;Organismal Systems;Organismal Systems;Organismal Systems	Digestive system;Digestive system;Digestive system;Excretory system	ko04974//Protein digestion and absorption;ko04976//Bile secretion;ko04978//Mineral absorption;ko04964//Proximal tubule bicarbonate reclamation	K12040;K12040;K12040;K12040	GO:0005886//plasma membrane;GO:0005903//brush border;GO:0009986//cell surface;GO:0016020//membrane;GO:0016021//integral component of membrane;GO:0016324//apical plasma membrane;GO:0031526//brush border membrane;GO:0070062//extracellular exosome	GO:0005515//protein binding;GO:0015297//antiporter activity;GO:0015299//solute:proton antiporter activity;GO:0015385//sodium:proton antiporter activity;GO:0015386//potassium:proton antiporter activity;GO:0030165//PDZ domain binding	GO:0006811//ion transport;GO:0006812//cation transport;GO:0006814//sodium ion transport;GO:0006885//regulation of pH;GO:0035725//sodium ion transmembrane transport;GO:0051453//regulation of intracellular pH;GO:0055085//transmembrane transport;GO:0071805//potassium ion transmembrane transport;GO:0098719//sodium ion import across plasma membrane;GO:1902600//proton transmembrane transport	--
ENSG00000177951	0.389855	0.0207426	0.999113	BET1L	Bet1 golgi vesicular membrane trafficking protein like [Source:HGNC Symbol;Acc:HGNC:19348]	Genetic Information Processing	Folding, sorting and degradation	ko04130//SNARE interactions in vesicular transport	K08504	GO:0000138//Golgi trans cisterna;GO:0000139//Golgi membrane;GO:0005768//endosome;GO:0005794//Golgi apparatus;GO:0005829//cytosol;GO:0016020//membrane;GO:0030173//integral component of Golgi membrane;GO:0031201//SNARE complex	GO:0005484//SNAP receptor activity	GO:0015031//protein transport;GO:0042147//retrograde transport, endosome to Golgi;GO:0061025//membrane fusion;GO:2000156//regulation of retrograde vesicle-mediated transport, Golgi to ER	--
ENSG00000111678	0.389992	0.0257579	0.999113	C12orf57	chromosome 12 open reading frame 57 [Source:HGNC Symbol;Acc:HGNC:29521]	-	-	-	-	GO:0005737//cytoplasm;GO:0016607//nuclear speck	GO:0003674//molecular_function;GO:0005515//protein binding	GO:0009791//post-embryonic development;GO:0014819//regulation of skeletal muscle contraction;GO:0021540//corpus callosum morphogenesis;GO:0021678//third ventricle development;GO:0036343//psychomotor behavior;GO:0048593//camera-type eye morphogenesis;GO:0050890//cognition	--
ENSG00000103363	0.390971	0.0333484	0.999113	ELOB	elongin B [Source:HGNC Symbol;Acc:HGNC:11619]	Human Diseases;Human Diseases;Genetic Information Processing;Environmental Information Processing;Human Diseases	Cancer: overview;Infectious disease: viral;Folding, sorting and degradation;Signal transduction;Cancer: specific types	ko05200//Pathways in cancer;ko05170//Human immunodeficiency virus 1 infection;ko04120//Ubiquitin mediated proteolysis;ko04066//HIF-1 signaling pathway;ko05211//Renal cell carcinoma	K03873;K03873;K03873;K03873;K03873	GO:0005634//nucleus;GO:0005654//nucleoplasm;GO:0005829//cytosol;GO:0030891//VCB complex;GO:0031462//Cul2-RING ubiquitin ligase complex;GO:0031466//Cul5-RING ubiquitin ligase complex;GO:0070449//elongin complex	GO:0001222//transcription corepressor binding;GO:0003746//translation elongation factor activity;GO:0005515//protein binding;GO:0031625//ubiquitin protein ligase binding	GO:0006367//transcription initiation from RNA polymerase II promoter;GO:0006368//transcription elongation from RNA polymerase II promoter;GO:0006414//translational elongation;GO:0016567//protein ubiquitination;GO:0032436//positive regulation of proteasomal ubiquitin-dependent protein catabolic process;GO:0065003//protein-containing complex assembly	--
ENSG00000165175	0.39243	0.0314952	0.999113	MID1IP1	MID1 interacting protein 1 [Source:HGNC Symbol;Acc:HGNC:20715]	-	-	-	-	GO:0005634//nucleus;GO:0005737//cytoplasm;GO:0005829//cytosol;GO:0005856//cytoskeleton;GO:0005874//microtubule;GO:0015630//microtubule cytoskeleton	GO:0005515//protein binding;GO:0008022//protein C-terminus binding;GO:0042802//identical protein binding	GO:0006629//lipid metabolic process;GO:0007026//negative regulation of microtubule depolymerization;GO:0045723//positive regulation of fatty acid biosynthetic process;GO:0046890//regulation of lipid biosynthetic process;GO:0051258//protein polymerization;GO:0051351//positive regulation of ligase activity	--
ENSG00000204386	0.398312	0.0215099	0.999113	NEU1	neuraminidase 1 [Source:HGNC Symbol;Acc:HGNC:7758]	Metabolism;Cellular Processes;Metabolism;Metabolism	Global and overview maps;Transport and catabolism;Lipid metabolism;Glycan biosynthesis and metabolism	ko01100//Metabolic pathways;ko04142//Lysosome;ko00600//Sphingolipid metabolism;ko00511//Other glycan degradation	K01186;K01186;K01186;K01186	GO:0005576//extracellular region;GO:0005737//cytoplasm;GO:0005764//lysosome;GO:0005765//lysosomal membrane;GO:0005886//plasma membrane;GO:0016020//membrane;GO:0030054//cell junction;GO:0031410//cytoplasmic vesicle;GO:0035580//specific granule lumen;GO:0043202//lysosomal lumen;GO:0043231//intracellular membrane-bounded organelle;GO:0070062//extracellular exosome	GO:0004308//exo-alpha-sialidase activity;GO:0005515//protein binding;GO:0016787//hydrolase activity;GO:0016798//hydrolase activity, acting on glycosyl bonds;GO:0016997//alpha-sialidase activity;GO:0052794//exo-alpha-(2->3)-sialidase activity;GO:0052795//exo-alpha-(2->6)-sialidase activity;GO:0052796//exo-alpha-(2->8)-sialidase activity	GO:0005975//carbohydrate metabolic process;GO:0006629//lipid metabolic process;GO:0006689//ganglioside catabolic process;GO:0008152//metabolic process;GO:0009313//oligosaccharide catabolic process;GO:0016042//lipid catabolic process	--
ENSG00000175213	0.402389	0.03285	0.999113	ZNF408	zinc finger protein 408 [Source:HGNC Symbol;Acc:HGNC:20041]	-	-	-	-	GO:0005634//nucleus	GO:0000978//RNA polymerase II cis-regulatory region sequence-specific DNA binding;GO:0000981//DNA-binding transcription factor activity, RNA polymerase II-specific;GO:0003677//DNA binding;GO:0005515//protein binding;GO:0042802//identical protein binding;GO:0046872//metal ion binding	GO:0006357//regulation of transcription by RNA polymerase II	zf-C2H2
ENSG00000077782	0.410139	0.0444426	0.999113	FGFR1	fibroblast growth factor receptor 1 [Source:HGNC Symbol;Acc:HGNC:3688]	Human Diseases;Environmental Information Processing;Environmental Information Processing;Environmental Information Processing;Environmental Information Processing;Organismal Systems;Cellular Processes;Environmental Information Processing;Human Diseases;Human Diseases;Cellular Processes;Organismal Systems;Human Diseases;Human Diseases;Human Diseases;Cellular Processes	Cancer: overview;Signal transduction;Signal transduction;Signal transduction;Signal transduction;Environmental adaptation;Cell motility;Signal transduction;Cancer: overview;Cancer: specific types;Cellular community - eukaryotes;Endocrine system;Cancer: specific types;Cancer: specific types;Cancer: overview;Cellular community - eukaryotes	ko05200//Pathways in cancer;ko04151//PI3K-Akt signaling pathway;ko04020//Calcium signaling pathway;ko04010//MAPK signaling pathway;ko04014//Ras signaling pathway;ko04714//Thermogenesis;ko04810//Regulation of actin cytoskeleton;ko04015//Rap1 signaling pathway;ko05205//Proteoglycans in cancer;ko05224//Breast cancer;ko04550//Signaling pathways regulating pluripotency of stem cells;ko04928//Parathyro…	K04362;K04362;K04362;K04362;K04362;K04362;K04362;K04362;K04362;K04362;K04362;K04362;K04362;K04362;K04362;K04362	GO:0005576//extracellular region;GO:0005634//nucleus;GO:0005737//cytoplasm;GO:0005829//cytosol;GO:0005886//plasma membrane;GO:0016020//membrane;GO:0016021//integral component of membrane;GO:0031410//cytoplasmic vesicle;GO:0043235//receptor complex	GO:0000166//nucleotide binding;GO:0004672//protein kinase activity;GO:0004713//protein tyrosine kinase activity;GO:0004714//transmembrane receptor protein tyrosine kinase activity;GO:0005007//fibroblast growth factor-activated receptor activity;GO:0005515//protein binding;GO:0005524//ATP binding;GO:0008201//heparin binding;GO:0016301//kinase activity;GO:0016740//transferase activity;GO:0017134//f…	GO:0000165//MAPK cascade;GO:0001501//skeletal system development;GO:0001764//neuron migration;GO:0001837//epithelial to mesenchymal transition;GO:0006468//protein phosphorylation;GO:0007169//transmembrane receptor protein tyrosine kinase signaling pathway;GO:0008284//positive regulation of cell population proliferation;GO:0008543//fibroblast growth factor receptor signaling pathway;GO:0010518//po…	--
ENSG00000130821	0.412988	0.0238095	0.999113	SLC6A8	solute carrier family 6 member 8 [Source:HGNC Symbol;Acc:HGNC:11055]	-	-	-	-	GO:0005886//plasma membrane;GO:0005887//integral component of plasma membrane;GO:0016020//membrane;GO:0016021//integral component of membrane;GO:0016324//apical plasma membrane	GO:0003674//molecular_function;GO:0005308//creatine transmembrane transporter activity;GO:0005309//creatine:sodium symporter activity;GO:0015293//symporter activity;GO:0022857//transmembrane transporter activity	GO:0006600//creatine metabolic process;GO:0006811//ion transport;GO:0006814//sodium ion transport;GO:0006836//neurotransmitter transport;GO:0006936//muscle contraction;GO:0015881//creatine transmembrane transport;GO:0035725//sodium ion transmembrane transport;GO:0055085//transmembrane transport;GO:0071702//organic substance transport;GO:0071705//nitrogen compound transport	--
ENSG00000197818	0.414646	0.0185281	0.999113	SLC9A8	solute carrier family 9 member A8 [Source:HGNC Symbol;Acc:HGNC:20728]	-	-	-	-	GO:0000139//Golgi membrane;GO:0001669//acrosomal vesicle;GO:0005794//Golgi apparatus;GO:0016020//membrane;GO:0016021//integral component of membrane;GO:0016324//apical plasma membrane;GO:0032585//multivesicular body membrane;GO:0032588//trans-Golgi network membrane	GO:0005515//protein binding;GO:0015297//antiporter activity;GO:0015299//solute:proton antiporter activity;GO:0015385//sodium:proton antiporter activity;GO:0015386//potassium:proton antiporter activity	GO:0001675//acrosome assembly;GO:0006811//ion transport;GO:0006812//cation transport;GO:0006814//sodium ion transport;GO:0006885//regulation of pH;GO:0035725//sodium ion transmembrane transport;GO:0051453//regulation of intracellular pH;GO:0055085//transmembrane transport;GO:0071805//potassium ion transmembrane transport;GO:1902600//proton transmembrane transport;GO:1905526//regulation of Golgi l…	--
ENSG00000108523	0.418212	0.044879	0.999113	RNF167	ring finger protein 167 [Source:HGNC Symbol;Acc:HGNC:24544]	-	-	-	-	GO:0005737//cytoplasm;GO:0005764//lysosome;GO:0005765//lysosomal membrane;GO:0005768//endosome;GO:0005829//cytosol;GO:0005886//plasma membrane;GO:0010008//endosome membrane;GO:0012505//endomembrane system;GO:0016020//membrane;GO:0036020//endolysosome membrane	GO:0004842//ubiquitin-protein transferase activity;GO:0005515//protein binding;GO:0008270//zinc ion binding;GO:0016740//transferase activity;GO:0046872//metal ion binding;GO:0061630//ubiquitin protein ligase activity	GO:0000209//protein polyubiquitination;GO:0006511//ubiquitin-dependent protein catabolic process;GO:0016567//protein ubiquitination;GO:0032418//lysosome localization;GO:0045786//negative regulation of cell cycle;GO:0051640//organelle localization;GO:0051966//regulation of synaptic transmission, glutamatergic;GO:1904262//negative regulation of TORC1 signaling;GO:1990253//cellular response to leuci…	--
ENSG00000165724	0.422455	0.0153746	0.999113	ZMYND19	zinc finger MYND-type containing 19 [Source:HGNC Symbol;Acc:HGNC:21146]	-	-	-	-	GO:0005737//cytoplasm;GO:0005886//plasma membrane;GO:0016020//membrane;GO:0045202//synapse	GO:0005515//protein binding;GO:0046872//metal ion binding	-	--
ENSG00000171298	0.424632	0.0447652	0.999113	GAA	alpha glucosidase [Source:HGNC Symbol;Acc:HGNC:4065]	Metabolism;Cellular Processes;Metabolism;Metabolism	Global and overview maps;Transport and catabolism;Carbohydrate metabolism;Carbohydrate metabolism	ko01100//Metabolic pathways;ko04142//Lysosome;ko00500//Starch and sucrose metabolism;ko00052//Galactose metabolism	K12316;K12316;K12316;K12316	GO:0005764//lysosome;GO:0005765//lysosomal membrane;GO:0005886//plasma membrane;GO:0016020//membrane;GO:0035577//azurophil granule membrane;GO:0043202//lysosomal lumen;GO:0043231//intracellular membrane-bounded organelle;GO:0070062//extracellular exosome;GO:0070821//tertiary granule membrane;GO:0101003//ficolin-1-rich granule membrane;GO:0110165//cellular anatomical entity;GO:0120282//autolysosom…	GO:0003824//catalytic activity;GO:0004553//hydrolase activity, hydrolyzing O-glycosyl compounds;GO:0004558//alpha-1,4-glucosidase activity;GO:0016787//hydrolase activity;GO:0016798//hydrolase activity, acting on glycosyl bonds;GO:0030246//carbohydrate binding;GO:0032450//maltose alpha-glucosidase activity;GO:0090599//alpha-glucosidase activity	GO:0000023//maltose metabolic process;GO:0002026//regulation of the force of heart contraction;GO:0002086//diaphragm contraction;GO:0003007//heart morphogenesis;GO:0005975//carbohydrate metabolic process;GO:0005977//glycogen metabolic process;GO:0005980//glycogen catabolic process;GO:0005985//sucrose metabolic process;GO:0006006//glucose metabolic process;GO:0006941//striated muscle contraction;G…	--
ENSG00000185298	0.426635	0.0422156	0.999113	CCDC137	coiled-coil domain containing 137 [Source:HGNC Symbol;Acc:HGNC:33451]	-	-	-	-	GO:0001650//fibrillar center;GO:0005634//nucleus;GO:0005694//chromosome;GO:0005730//nucleolus	GO:0003723//RNA binding;GO:0005515//protein binding	-	--
ENSG00000197982	0.427877	0.0309119	0.999113	C1orf122	chromosome 1 open reading frame 122 [Source:HGNC Symbol;Acc:HGNC:24789]	-	-	-	-	-	-	-	--
ENSG00000179918	0.430376	0.0174044	0.999113	SEPHS2	selenophosphate synthetase 2 [Source:HGNC Symbol;Acc:HGNC:19686]	-	-	-	-	GO:0005575//cellular_component;GO:0005737//cytoplasm;GO:0005829//cytosol	GO:0000166//nucleotide binding;GO:0004756//selenide, water dikinase activity;GO:0005524//ATP binding;GO:0016301//kinase activity;GO:0016740//transferase activity;GO:0046872//metal ion binding	GO:0001887//selenium compound metabolic process;GO:0016259//selenocysteine metabolic process;GO:0016260//selenocysteine biosynthetic process;GO:0016310//phosphorylation	--
ENSG00000168003	0.433642	0.0417921	0.999113	SLC3A2	solute carrier family 3 member 2 [Source:HGNC Symbol;Acc:HGNC:11026]	Environmental Information Processing;Organismal Systems;Cellular Processes	Signal transduction;Digestive system;Cell growth and death	ko04150//mTOR signaling pathway;ko04974//Protein digestion and absorption;ko04216//Ferroptosis	K06519;K06519;K06519	GO:0005654//nucleoplasm;GO:0005764//lysosome;GO:0005765//lysosomal membrane;GO:0005886//plasma membrane;GO:0009925//basal plasma membrane;GO:0009986//cell surface;GO:0016020//membrane;GO:0016323//basolateral plasma membrane;GO:0016324//apical plasma membrane;GO:0042470//melanosome;GO:0043025//neuronal cell body;GO:0044225//apical pole of neuron;GO:0045202//synapse;GO:0070062//extracellular exosom…	GO:0003723//RNA binding;GO:0003725//double-stranded RNA binding;GO:0005432//calcium:sodium antiporter activity;GO:0005515//protein binding;GO:0015173//aromatic amino acid transmembrane transporter activity;GO:0015175//neutral amino acid transmembrane transporter activity;GO:0015180//L-alanine transmembrane transporter activity;GO:0015190//L-leucine transmembrane transporter activity;GO:0045296//c…	GO:0005975//carbohydrate metabolic process;GO:0006816//calcium ion transport;GO:0006865//amino acid transport;GO:0015818//isoleucine transport;GO:0015820//leucine transport;GO:0015821//methionine transport;GO:0015823//phenylalanine transport;GO:0015824//proline transport;GO:0015827//tryptophan transport;GO:0015828//tyrosine transport;GO:0015829//valine transport;GO:0035725//sodium ion transmembra…	--
ENSG00000258465	0.434032	0.0364406	0.999113	PEX19	novel protein	-	-	-	-	GO:0005777//peroxisome;GO:0005778//peroxisomal membrane;GO:0016020//membrane	-	GO:0007031//peroxisome organization	--
ENSG00000165886	0.439211	0.0209884	0.999113	UBTD1	ubiquitin domain containing 1 [Source:HGNC Symbol;Acc:HGNC:25683]	-	-	-	-	-	GO:0005515//protein binding	-	--
ENSG00000105732	0.443692	0.0419106	0.999113	ZNF574	zinc finger protein 574 [Source:HGNC Symbol;Acc:HGNC:26166]	-	-	-	-	GO:0005634//nucleus	GO:0000978//RNA polymerase II cis-regulatory region sequence-specific DNA binding;GO:0001228//DNA-binding transcription activator activity, RNA polymerase II-specific;GO:0003677//DNA binding;GO:0046872//metal ion binding	GO:0006357//regulation of transcription by RNA polymerase II;GO:0045944//positive regulation of transcription by RNA polymerase II	zf-C2H2
ENSG00000114767	0.443892	0.0389065	0.999113	RRP9	ribosomal RNA processing 9, U3 small nucleolar RNA binding protein [Source:HGNC Symbol;Acc:HGNC:16829]	-	-	-	-	GO:0005634//nucleus;GO:0005654//nucleoplasm;GO:0005730//nucleolus;GO:0031428//box C/D RNP complex;GO:0032040//small-subunit processome;GO:1990904//ribonucleoprotein complex	GO:0003723//RNA binding;GO:0005515//protein binding;GO:0030515//snoRNA binding;GO:0034511//U3 snoRNA binding	GO:0006364//rRNA processing	--
ENSG00000171222	0.455053	0.00294129	0.999113	SCAND1	SCAN domain containing 1 [Source:HGNC Symbol;Acc:HGNC:10566]	-	-	-	-	GO:0005634//nucleus	GO:0005515//protein binding	GO:0045893//positive regulation of transcription, DNA-templated	--
ENSG00000185269	0.458986	0.0233035	0.999113	NOTUM	notum, palmitoleoyl-protein carboxylesterase [Source:HGNC Symbol;Acc:HGNC:27106]	Environmental Information Processing	Signal transduction	ko04310//Wnt signaling pathway	K19882	GO:0005576//extracellular region;GO:0005788//endoplasmic reticulum lumen	GO:0004629//phospholipase C activity;GO:0005515//protein binding;GO:0016298//lipase activity;GO:0016787//hydrolase activity;GO:1990699//palmitoleyl hydrolase activity	GO:0016055//Wnt signaling pathway;GO:0030178//negative regulation of Wnt signaling pathway;GO:0030500//regulation of bone mineralization;GO:0060348//bone development;GO:0090090//negative regulation of canonical Wnt signaling pathway;GO:1990697//protein depalmitoleylation	--
ENSG00000081692	0.459236	0.0354019	0.999113	JMJD4	jumonji domain containing 4 [Source:HGNC Symbol;Acc:HGNC:25724]	-	-	-	-	GO:0005634//nucleus;GO:0005737//cytoplasm	GO:0005515//protein binding;GO:0016491//oxidoreductase activity;GO:0016706//2-oxoglutarate-dependent dioxygenase activity;GO:0043565//sequence-specific DNA binding;GO:0046872//metal ion binding;GO:0051213//dioxygenase activity;GO:0106156//peptidyl-lysine 4-dioxygenase activity	GO:0010629//negative regulation of gene expression;GO:0018126//protein hydroxylation;GO:0045905//positive regulation of translational termination	--
ENSG00000162520	0.461671	0.0329203	0.999113	SYNC	syncoilin, intermediate filament protein [Source:HGNC Symbol;Acc:HGNC:28897]	-	-	-	-	GO:0005737//cytoplasm;GO:0005829//cytosol;GO:0005882//intermediate filament;GO:0030018//Z disc;GO:0031594//neuromuscular junction;GO:0042383//sarcolemma;GO:0048471//perinuclear region of cytoplasm	GO:0005515//protein binding	GO:0045103//intermediate filament-based process	--
ENSG00000213741	0.465444	0.00964663	0.999113	RPS29	ribosomal protein S29 [Source:HGNC Symbol;Acc:HGNC:10419]	Human Diseases;Genetic Information Processing	Infectious disease: viral;Translation	ko05171//Coronavirus disease - COVID-19;ko03010//Ribosome	K02980;K02980	GO:0005654//nucleoplasm;GO:0005737//cytoplasm;GO:0005783//endoplasmic reticulum;GO:0005791//rough endoplasmic reticulum;GO:0005829//cytosol;GO:0005840//ribosome;GO:0005925//focal adhesion;GO:0015935//small ribosomal subunit;GO:0022627//cytosolic small ribosomal subunit;GO:0042788//polysomal ribosome;GO:0070062//extracellular exosome;GO:0098556//cytoplasmic side of rough endoplasmic reticulum memb…	GO:0003723//RNA binding;GO:0003735//structural constituent of ribosome;GO:0008270//zinc ion binding;GO:0046872//metal ion binding	GO:0002181//cytoplasmic translation;GO:0006412//translation	--
ENSG00000007866	0.471245	0.0233532	0.999113	TEAD3	TEA domain transcription factor 3 [Source:HGNC Symbol;Acc:HGNC:11716]	Environmental Information Processing;Environmental Information Processing;Environmental Information Processing	Signal transduction;Signal transduction;Signal transduction	ko04390//Hippo signaling pathway;ko04391//Hippo signaling pathway - fly;ko04392//Hippo signaling pathway - multiple species	K09448;K09448;K09448	GO:0000785//chromatin;GO:0005634//nucleus;GO:0005654//nucleoplasm;GO:0005667//transcription regulator complex	GO:0000978//RNA polymerase II cis-regulatory region sequence-specific DNA binding;GO:0000981//DNA-binding transcription factor activity, RNA polymerase II-specific;GO:0003677//DNA binding;GO:0003700//DNA-binding transcription factor activity;GO:0005515//protein binding;GO:0061629//RNA polymerase II-specific DNA-binding transcription factor binding	GO:0006355//regulation of transcription, DNA-templated;GO:0006357//regulation of transcription by RNA polymerase II;GO:0007565//female pregnancy;GO:0035329//hippo signaling;GO:0045944//positive regulation of transcription by RNA polymerase II;GO:0048568//embryonic organ development;GO:0055059//asymmetric neuroblast division	TEA
ENSG00000173638	0.472556	0.0247092	0.999113	SLC19A1	solute carrier family 19 member 1 [Source:HGNC Symbol;Acc:HGNC:10937]	Human Diseases;Organismal Systems	Drug resistance: antineoplastic;Digestive system	ko01523//Antifolate resistance;ko04977//Vitamin digestion and absorption	K14609;K14609	GO:0005886//plasma membrane;GO:0005887//integral component of plasma membrane;GO:0016020//membrane;GO:0016021//integral component of membrane;GO:0016323//basolateral plasma membrane;GO:0016324//apical plasma membrane;GO:0031526//brush border membrane	GO:0005515//protein binding;GO:0005542//folic acid binding;GO:0008514//organic anion transmembrane transporter activity;GO:0008517//folic acid transmembrane transporter activity;GO:0008518//folate:anion antiporter activity;GO:0015297//antiporter activity;GO:0015350//methotrexate transmembrane transporter activity;GO:0042910//xenobiotic transmembrane transporter activity;GO:0061507//2',3'-cyclic G…	GO:0006855//xenobiotic transmembrane transport;GO:0007565//female pregnancy;GO:0015711//organic anion transport;GO:0015884//folic acid transport;GO:0035461//vitamin transmembrane transport;GO:0046655//folic acid metabolic process;GO:0051180//vitamin transport;GO:0051958//methotrexate transport;GO:0055085//transmembrane transport;GO:0071702//organic substance transport;GO:0098838//folate transmemb…	--
ENSG00000168806	0.473803	0.0488097	0.999113	LCMT2	leucine carboxyl methyltransferase 2 [Source:HGNC Symbol;Acc:HGNC:17558]	-	-	-	-	GO:0005737//cytoplasm	GO:0005515//protein binding;GO:0008168//methyltransferase activity;GO:0008175//tRNA methyltransferase activity;GO:0016740//transferase activity	GO:0006400//tRNA modification;GO:0008033//tRNA processing;GO:0030488//tRNA methylation;GO:0031591//wybutosine biosynthetic process;GO:0032259//methylation	--
ENSG00000196517	0.47633	0.0261238	0.999113	SLC6A9	solute carrier family 6 member 9 [Source:HGNC Symbol;Acc:HGNC:11056]	Organismal Systems	Nervous system	ko04721//Synaptic vesicle cycle	K05038	GO:0005768//endosome;GO:0005886//plasma membrane;GO:0005887//integral component of plasma membrane;GO:0009925//basal plasma membrane;GO:0014069//postsynaptic density;GO:0016020//membrane;GO:0016021//integral component of membrane;GO:0016323//basolateral plasma membrane;GO:0016324//apical plasma membrane;GO:0016328//lateral plasma membrane;GO:0030672//synaptic vesicle membrane;GO:0031045//dense co…	GO:0005283//amino acid:sodium symporter activity;GO:0015187//glycine transmembrane transporter activity;GO:0015293//symporter activity;GO:0015375//glycine:sodium symporter activity;GO:0022857//transmembrane transporter activity	GO:0003333//amino acid transmembrane transport;GO:0006836//neurotransmitter transport;GO:0006865//amino acid transport;GO:0015816//glycine transport;GO:0035725//sodium ion transmembrane transport;GO:0046985//positive regulation of hemoglobin biosynthetic process;GO:0055085//transmembrane transport;GO:0060092//regulation of synaptic transmission, glycinergic;GO:0070455//positive regulation of heme…	--
ENSG00000101412	0.478392	0.0498763	0.999113	E2F1	E2F transcription factor 1 [Source:HGNC Symbol;Acc:HGNC:3113]	Human Diseases;Human Diseases;Human Diseases;Human Diseases;Human Diseases;Human Diseases;Human Diseases;Human Diseases;Human Diseases;Human Diseases;Cellular Processes;Human Diseases;Human Diseases;Human Diseases;Human Diseases;Cellular Processes;Human Diseases;Human Diseases;Human Diseases;Human Diseases;Human Diseases;Human Diseases;Human Diseases;Human Diseases;Cellular Processes;Human Diseas…	Cancer: overview;Infectious disease: viral;Infectious disease: viral;Infectious disease: viral;Infectious disease: viral;Cancer: overview;Infectious disease: viral;Cancer: overview;Cancer: specific types;Infectious disease: viral;Cell growth and death;Infectious disease: viral;Endocrine and metabolic disease;Cancer: specific types;Cancer: specific types;Cell growth and death;Cancer: specific type…	ko05200//Pathways in cancer;ko05165//Human papillomavirus infection;ko05169//Epstein-Barr virus infection;ko05163//Human cytomegalovirus infection;ko05166//Human T-cell leukemia virus 1 infection;ko05207//Chemical carcinogenesis - receptor activation;ko05167//Kaposi sarcoma-associated herpesvirus infection;ko05206//MicroRNAs in cancer;ko05225//Hepatocellular carcinoma;ko05161//Hepatitis B;ko04218…	K17454;K17454;K17454;K17454;K17454;K17454;K17454;K17454;K17454;K17454;K17454;K17454;K17454;K17454;K17454;K17454;K17454;K17454;K17454;K17454;K17454;K17454;K17454;K17454;K17454;K17454	GO:0000228//nuclear chromosome;GO:0000785//chromatin;GO:0005634//nucleus;GO:0005654//nucleoplasm;GO:0005667//transcription regulator complex;GO:0005737//cytoplasm;GO:0005813//centrosome;GO:0032991//protein-containing complex;GO:0035189//Rb-E2F complex;GO:0090575//RNA polymerase II transcription regulator complex	GO:0000976//transcription cis-regulatory region binding;GO:0000978//RNA polymerase II cis-regulatory region sequence-specific DNA binding;GO:0000981//DNA-binding transcription factor activity, RNA polymerase II-specific;GO:0000987//cis-regulatory region sequence-specific DNA binding;GO:0001216//DNA-binding transcription activator activity;GO:0003677//DNA binding;GO:0003700//DNA-binding transcript…	GO:0000077//DNA damage checkpoint signaling;GO:0000082//G1/S transition of mitotic cell cycle;GO:0000083//regulation of transcription involved in G1/S transition of mitotic cell cycle;GO:0000122//negative regulation of transcription by RNA polymerase II;GO:0006351//transcription, DNA-templated;GO:0006355//regulation of transcription, DNA-templated;GO:0006357//regulation of transcription by RNA po…	E2F
ENSG00000168061	0.478827	0.0219948	0.999113	SAC3D1	SAC3 domain containing 1 [Source:HGNC Symbol;Acc:HGNC:30179]	-	-	-	-	GO:0032991//protein-containing complex	-	-	--
ENSG00000189367	0.48123	0.0168546	0.999113	KIAA0408	KIAA0408 [Source:HGNC Symbol;Acc:HGNC:21636]	-	-	-	-	-	GO:0005515//protein binding	-	--
ENSG00000102265	0.490626	0.0165539	0.999113	TIMP1	TIMP metallopeptidase inhibitor 1 [Source:HGNC Symbol;Acc:HGNC:11820]	Environmental Information Processing	Signal transduction	ko04066//HIF-1 signaling pathway	K16451	GO:0005576//extracellular region;GO:0005581//collagen trimer;GO:0005604//basement membrane;GO:0005615//extracellular space;GO:0005788//endoplasmic reticulum lumen;GO:0031012//extracellular matrix;GO:0031093//platelet alpha granule lumen;GO:0070062//extracellular exosome	GO:0002020//protease binding;GO:0004857//enzyme inhibitor activity;GO:0005125//cytokine activity;GO:0005515//protein binding;GO:0008083//growth factor activity;GO:0008191//metalloendopeptidase inhibitor activity;GO:0008270//zinc ion binding;GO:0030414//peptidase inhibitor activity;GO:0046872//metal ion binding	GO:0001775//cell activation;GO:0002248//connective tissue replacement involved in inflammatory response wound healing;GO:0007165//signal transduction;GO:0007568//aging;GO:0008284//positive regulation of cell population proliferation;GO:0009725//response to hormone;GO:0010033//response to organic substance;GO:0010466//negative regulation of peptidase activity;GO:0010951//negative regulation of end…	--
ENSG00000172530	0.490978	0.0259134	0.999113	BANP	BTG3 associated nuclear protein [Source:HGNC Symbol;Acc:HGNC:13450]	-	-	-	-	GO:0005634//nucleus;GO:0005654//nucleoplasm;GO:0016604//nuclear body	GO:0003677//DNA binding;GO:0005515//protein binding;GO:0042802//identical protein binding	GO:0006325//chromatin organization;GO:0007049//cell cycle;GO:0034504//protein localization to nucleus;GO:0042177//negative regulation of protein catabolic process;GO:0045893//positive regulation of transcription, DNA-templated	--
ENSG00000132382	0.49501	0.0349571	0.999113	MYBBP1A	MYB binding protein 1a [Source:HGNC Symbol;Acc:HGNC:7546]	-	-	-	-	GO:0005634//nucleus;GO:0005654//nucleoplasm;GO:0005730//nucleolus;GO:0005737//cytoplasm;GO:0016020//membrane;GO:0042564//NLS-dependent protein nuclear import complex;GO:0043231//intracellular membrane-bounded organelle;GO:0110016//B-WICH complex	GO:0003677//DNA binding;GO:0003714//transcription corepressor activity;GO:0003723//RNA binding;GO:0008134//transcription factor binding;GO:0043565//sequence-specific DNA binding;GO:0070888//E-box binding	GO:0001649//osteoblast differentiation;GO:0006338//chromatin remodeling;GO:0006355//regulation of transcription, DNA-templated;GO:0022904//respiratory electron transport chain;GO:0032922//circadian regulation of gene expression;GO:0035066//positive regulation of histone acetylation;GO:0042149//cellular response to glucose starvation;GO:0042254//ribosome biogenesis;GO:0045892//negative regulation …	--
ENSG00000241360	0.498696	0.0129984	0.999113	PDXP	pyridoxal phosphatase [Source:HGNC Symbol;Acc:HGNC:30259]	Metabolism;Metabolism	Global and overview maps;Metabolism of cofactors and vitamins	ko01100//Metabolic pathways;ko00750//Vitamin B6 metabolism	K07758;K07758	GO:0005737//cytoplasm;GO:0005829//cytosol;GO:0005856//cytoskeleton;GO:0005886//plasma membrane;GO:0005911//cell-cell junction;GO:0015629//actin cytoskeleton;GO:0016020//membrane;GO:0030027//lamellipodium;GO:0030496//midbody;GO:0031258//lamellipodium membrane;GO:0032154//cleavage furrow;GO:0032587//ruffle membrane;GO:0042995//cell projection;GO:0070938//contractile ring	GO:0000287//magnesium ion binding;GO:0004721//phosphoprotein phosphatase activity;GO:0004722//protein serine/threonine phosphatase activity;GO:0005515//protein binding;GO:0016787//hydrolase activity;GO:0016791//phosphatase activity;GO:0017018//myosin phosphatase activity;GO:0031072//heat shock protein binding;GO:0033883//pyridoxal phosphatase activity;GO:0042803//protein homodimerization activity…	GO:0006470//protein dephosphorylation;GO:0007088//regulation of mitotic nuclear division;GO:0016311//dephosphorylation;GO:0030836//positive regulation of actin filament depolymerization;GO:0031247//actin rod assembly;GO:0032361//pyridoxal phosphate catabolic process;GO:0032465//regulation of cytokinesis;GO:0071318//cellular response to ATP	--
ENSG00000173894	0.50546	0.0176202	0.999113	CBX2	chromobox 2 [Source:HGNC Symbol;Acc:HGNC:1552]	-	-	-	-	GO:0000791//euchromatin;GO:0000792//heterochromatin;GO:0005634//nucleus;GO:0005654//nucleoplasm;GO:0005694//chromosome;GO:0031519//PcG protein complex;GO:0035102//PRC1 complex	GO:0003677//DNA binding;GO:0003682//chromatin binding;GO:0005515//protein binding;GO:0035064//methylated histone binding	GO:0000122//negative regulation of transcription by RNA polymerase II;GO:0006325//chromatin organization;GO:0007548//sex differentiation;GO:0030154//cell differentiation;GO:0045137//development of primary sexual characteristics	--
ENSG00000178922	0.506052	0.0244085	0.999113	HYI	hydroxypyruvate isomerase (putative) [Source:HGNC Symbol;Acc:HGNC:26948]	-	-	-	-	GO:0005575//cellular_component	GO:0003674//molecular_function;GO:0005515//protein binding;GO:0008903//hydroxypyruvate isomerase activity;GO:0016853//isomerase activity	GO:0008150//biological_process;GO:0046487//glyoxylate metabolic process	--
ENSG00000099622	0.509752	0.0318615	0.999113	CIRBP	cold inducible RNA binding protein [Source:HGNC Symbol;Acc:HGNC:1982]	-	-	-	-	GO:0005634//nucleus;GO:0005654//nucleoplasm;GO:0005681//spliceosomal complex;GO:0005737//cytoplasm;GO:0010494//cytoplasmic stress granule	GO:0003676//nucleic acid binding;GO:0003723//RNA binding;GO:0003730//mRNA 3'-UTR binding;GO:0005515//protein binding;GO:0030371//translation repressor activity;GO:0070181//small ribosomal subunit rRNA binding	GO:0009409//response to cold;GO:0009411//response to UV;GO:0017148//negative regulation of translation;GO:0034063//stress granule assembly;GO:0045727//positive regulation of translation;GO:0048026//positive regulation of mRNA splicing, via spliceosome;GO:0048255//mRNA stabilization	--
ENSG00000120913	0.515516	0.0332511	0.999113	PDLIM2	PDZ and LIM domain 2 [Source:HGNC Symbol;Acc:HGNC:13992]	-	-	-	-	GO:0001725//stress fiber;GO:0005634//nucleus;GO:0005737//cytoplasm;GO:0005856//cytoskeleton;GO:0005912//adherens junction;GO:0030018//Z disc;GO:0030864//cortical actin cytoskeleton;GO:0031941//filamentous actin	GO:0003779//actin binding;GO:0005515//protein binding;GO:0031005//filamin binding;GO:0031625//ubiquitin protein ligase binding;GO:0032036//myosin heavy chain binding;GO:0046872//metal ion binding;GO:0051371//muscle alpha-actinin binding;GO:0051393//alpha-actinin binding	GO:0007507//heart development;GO:0030036//actin cytoskeleton organization;GO:0030163//protein catabolic process;GO:0061061//muscle structure development	--
ENSG00000115756	0.517035	0.0331633	0.999113	HPCAL1	hippocalcin like 1 [Source:HGNC Symbol;Acc:HGNC:5145]	-	-	-	-	GO:0016020//membrane	GO:0005509//calcium ion binding;GO:0005515//protein binding;GO:0046872//metal ion binding	-	--
ENSG00000181790	0.517793	0.0400451	0.999113	ADGRB1	adhesion G protein-coupled receptor B1 [Source:HGNC Symbol;Acc:HGNC:943]	Cellular Processes	Cell growth and death	ko04115//p53 signaling pathway	K04596	GO:0001891//phagocytic cup;GO:0005576//extracellular region;GO:0005615//extracellular space;GO:0005886//plasma membrane;GO:0005887//integral component of plasma membrane;GO:0005911//cell-cell junction;GO:0005925//focal adhesion;GO:0014069//postsynaptic density;GO:0016020//membrane;GO:0016021//integral component of membrane;GO:0030425//dendrite;GO:0042995//cell projection;GO:0043197//dendritic spi…	GO:0001530//lipopolysaccharide binding;GO:0001786//phosphatidylserine binding;GO:0004888//transmembrane signaling receptor activity;GO:0004930//G protein-coupled receptor activity;GO:0005515//protein binding;GO:0030165//PDZ domain binding	GO:0002376//immune system process;GO:0006909//phagocytosis;GO:0006910//phagocytosis, recognition;GO:0006911//phagocytosis, engulfment;GO:0007155//cell adhesion;GO:0007165//signal transduction;GO:0007166//cell surface receptor signaling pathway;GO:0007186//G protein-coupled receptor signaling pathway;GO:0007189//adenylate cyclase-activating G protein-coupled receptor signaling pathway;GO:0007399//…	--
ENSG00000172731	0.520956	0.0400309	0.999113	LRRC20	leucine rich repeat containing 20 [Source:HGNC Symbol;Acc:HGNC:23421]	-	-	-	-	-	GO:0005515//protein binding	-	--
ENSG00000144485	0.525461	0.0260274	0.999113	HES6	hes family bHLH transcription factor 6 [Source:HGNC Symbol;Acc:HGNC:18254]	Human Diseases	Infectious disease: viral	ko05165//Human papillomavirus infection	K09087	GO:0000785//chromatin;GO:0005634//nucleus;GO:0005667//transcription regulator complex	GO:0000977//RNA polymerase II transcription regulatory region sequence-specific DNA binding;GO:0000978//RNA polymerase II cis-regulatory region sequence-specific DNA binding;GO:0000981//DNA-binding transcription factor activity, RNA polymerase II-specific;GO:0001227//DNA-binding transcription repressor activity, RNA polymerase II-specific;GO:0003677//DNA binding;GO:0003700//DNA-binding transcript…	GO:0000122//negative regulation of transcription by RNA polymerase II;GO:0006355//regulation of transcription, DNA-templated;GO:0006357//regulation of transcription by RNA polymerase II;GO:0007399//nervous system development;GO:0009952//anterior/posterior pattern specification;GO:0030154//cell differentiation;GO:0043433//negative regulation of DNA-binding transcription factor activity;GO:0050767/…	bHLH
ENSG00000166166	0.542099	0.00674192	0.999113	TRMT61A	tRNA methyltransferase 61A [Source:HGNC Symbol;Acc:HGNC:23790]	-	-	-	-	GO:0005634//nucleus;GO:0005654//nucleoplasm;GO:0031515//tRNA (m1A) methyltransferase complex	GO:0005515//protein binding;GO:0008168//methyltransferase activity;GO:0016429//tRNA (adenine-N1-)-methyltransferase activity;GO:0016740//transferase activity;GO:0061953//mRNA (adenine-N1-)-methyltransferase activity	GO:0008033//tRNA processing;GO:0030488//tRNA methylation;GO:0032259//methylation;GO:0080009//mRNA methylation	--
ENSG00000196372	0.547567	0.016274	0.999113	ASB13	ankyrin repeat and SOCS box containing 13 [Source:HGNC Symbol;Acc:HGNC:19765]	-	-	-	-	GO:0005829//cytosol	GO:0005515//protein binding	GO:0016567//protein ubiquitination;GO:0035556//intracellular signal transduction	--
ENSG00000128578	0.549126	0.0472639	0.999113	STRIP2	striatin interacting protein 2 [Source:HGNC Symbol;Acc:HGNC:22209]	-	-	-	-	GO:0005737//cytoplasm;GO:0005829//cytosol	GO:0003674//molecular_function	GO:0007010//cytoskeleton organization;GO:0008360//regulation of cell shape;GO:0016477//cell migration	--
ENSG00000280893	0.553587	0.00992595	0.999113	PRRT2	novel transcript	-	-	-	-	GO:0016020//membrane	-	-	--
ENSG00000115350	0.553812	0.0149997	0.999113	POLE4	DNA polymerase epsilon 4, accessory subunit [Source:HGNC Symbol;Acc:HGNC:18755]	Genetic Information Processing;Genetic Information Processing;Genetic Information Processing	Replication and repair;Replication and repair;Replication and repair	ko03420//Nucleotide excision repair;ko03030//DNA replication;ko03410//Base excision repair	K03506;K03506;K03506	GO:0005634//nucleus;GO:0005654//nucleoplasm;GO:0008622//epsilon DNA polymerase complex;GO:0140672//ATAC complex	GO:0003677//DNA binding;GO:0003887//DNA-directed DNA polymerase activity;GO:0005515//protein binding;GO:0046982//protein heterodimerization activity	GO:0006261//DNA-dependent DNA replication;GO:0071897//DNA biosynthetic process	--
ENSG00000182208	0.554032	0.0378345	0.999113	MOB2	MOB kinase activator 2 [Source:HGNC Symbol;Acc:HGNC:24904]	-	-	-	-	GO:0005634//nucleus;GO:0005654//nucleoplasm;GO:0005730//nucleolus;GO:0005737//cytoplasm;GO:0005829//cytosol;GO:0048471//perinuclear region of cytoplasm	GO:0005515//protein binding;GO:0030295//protein kinase activator activity;GO:0046872//metal ion binding	GO:0001934//positive regulation of protein phosphorylation;GO:0007165//signal transduction	--
ENSG00000146966	0.559237	0.0478634	0.999113	DENND2A	DENN domain containing 2A [Source:HGNC Symbol;Acc:HGNC:22212]	-	-	-	-	GO:0005737//cytoplasm;GO:0005829//cytosol;GO:0005856//cytoskeleton;GO:0015629//actin cytoskeleton	GO:0005085//guanyl-nucleotide exchange factor activity;GO:0005515//protein binding	GO:0015031//protein transport;GO:0042147//retrograde transport, endosome to Golgi	--
ENSG00000164620	0.560416	0.0240637	0.999113	RELL2	RELT like 2 [Source:HGNC Symbol;Acc:HGNC:26902]	-	-	-	-	GO:0005604//basement membrane;GO:0005886//plasma membrane;GO:0016020//membrane;GO:0031012//extracellular matrix	GO:0005515//protein binding;GO:0005518//collagen binding	GO:0010811//positive regulation of cell-substrate adhesion;GO:1900745//positive regulation of p38MAPK cascade	--
ENSG00000162413	0.590264	0.0418191	0.999113	KLHL21	kelch like family member 21 [Source:HGNC Symbol;Acc:HGNC:29041]	-	-	-	-	GO:0005737//cytoplasm;GO:0005819//spindle;GO:0005827//polar microtubule;GO:0005829//cytosol;GO:0005856//cytoskeleton;GO:0031463//Cul3-RING ubiquitin ligase complex	GO:0004842//ubiquitin-protein transferase activity;GO:0005515//protein binding;GO:0097602//cullin family protein binding	GO:0007049//cell cycle;GO:0016567//protein ubiquitination;GO:0032465//regulation of cytokinesis;GO:0035853//chromosome passenger complex localization to spindle midzone;GO:0051301//cell division	--
ENSG00000204388	0.591955	0.026707	0.999113	HSPA1B	heat shock protein family A (Hsp70) member 1B [Source:HGNC Symbol;Acc:HGNC:5233]	Environmental Information Processing;Human Diseases;Cellular Processes;Human Diseases;Genetic Information Processing;Human Diseases;Organismal Systems;Genetic Information Processing;Human Diseases;Organismal Systems;Organismal Systems;Human Diseases	Signal transduction;Neurodegenerative disease;Transport and catabolism;Cardiovascular disease;Folding, sorting and degradation;Infectious disease: viral;Endocrine system;Transcription;Infectious disease: parasitic;Immune system;Aging;Infectious disease: bacterial	ko04010//MAPK signaling pathway;ko05020//Prion disease;ko04144//Endocytosis;ko05417//Lipid and atherosclerosis;ko04141//Protein processing in endoplasmic reticulum;ko05162//Measles;ko04915//Estrogen signaling pathway;ko03040//Spliceosome;ko05145//Toxoplasmosis;ko04612//Antigen processing and presentation;ko04213//Longevity regulating pathway - multiple species;ko05134//Legionellosis	K03283;K03283;K03283;K03283;K03283;K03283;K03283;K03283;K03283;K03283;K03283;K03283	GO:0005576//extracellular region;GO:0005634//nucleus;GO:0005654//nucleoplasm;GO:0005737//cytoplasm;GO:0005739//mitochondrion;GO:0005783//endoplasmic reticulum;GO:0005813//centrosome;GO:0005814//centriole;GO:0005815//microtubule organizing center;GO:0005829//cytosol;GO:0005856//cytoskeleton;GO:0005886//plasma membrane;GO:0005925//focal adhesion;GO:0016234//inclusion body;GO:0016235//aggresome;GO:0…	GO:0000166//nucleotide binding;GO:0001618//virus receptor activity;GO:0001664//G protein-coupled receptor binding;GO:0003723//RNA binding;GO:0005102//signaling receptor binding;GO:0005515//protein binding;GO:0005524//ATP binding;GO:0016887//ATP hydrolysis activity;GO:0019899//enzyme binding;GO:0031072//heat shock protein binding;GO:0031625//ubiquitin protein ligase binding;GO:0042826//histone dea…	GO:0006402//mRNA catabolic process;GO:0006457//protein folding;GO:0008285//negative regulation of cell population proliferation;GO:0010628//positive regulation of gene expression;GO:0016192//vesicle-mediated transport;GO:0030308//negative regulation of cell growth;GO:0031396//regulation of protein ubiquitination;GO:0031397//negative regulation of protein ubiquitination;GO:0032436//positive regula…	--
ENSG00000149564	0.595586	0.039629	0.999113	ESAM	endothelial cell adhesion molecule [Source:HGNC Symbol;Acc:HGNC:17474]	Environmental Information Processing;Organismal Systems	Signaling molecules and interaction;Immune system	ko04514//Cell adhesion molecules;ko04670//Leukocyte transendothelial migration	K06787;K06787	GO:0005886//plasma membrane;GO:0005911//cell-cell junction;GO:0005912//adherens junction;GO:0005923//bicellular tight junction;GO:0016020//membrane;GO:0032991//protein-containing complex;GO:0070161//anchoring junction	GO:0005515//protein binding;GO:0098632//cell-cell adhesion mediator activity	GO:0007155//cell adhesion;GO:0007156//homophilic cell adhesion via plasma membrane adhesion molecules;GO:0008104//protein localization;GO:0030833//regulation of actin filament polymerization;GO:0035633//maintenance of blood-brain barrier;GO:0070830//bicellular tight junction assembly;GO:0098609//cell-cell adhesion;GO:2000249//regulation of actin cytoskeleton reorganization	--
ENSG00000135636	0.600872	0.0458627	0.999113	DYSF	dysferlin [Source:HGNC Symbol;Acc:HGNC:3097]	-	-	-	-	GO:0005768//endosome;GO:0005769//early endosome;GO:0005770//late endosome;GO:0005886//plasma membrane;GO:0016020//membrane;GO:0016021//integral component of membrane;GO:0030139//endocytic vesicle;GO:0030315//T-tubule;GO:0030659//cytoplasmic vesicle membrane;GO:0031410//cytoplasmic vesicle;GO:0034451//centriolar satellite;GO:0042383//sarcolemma;GO:0070062//extracellular exosome	GO:0005509//calcium ion binding;GO:0005515//protein binding;GO:0005543//phospholipid binding;GO:0005544//calcium-dependent phospholipid binding;GO:0008289//lipid binding;GO:0046872//metal ion binding	GO:0001778//plasma membrane repair;GO:0002280//monocyte activation involved in immune response;GO:0002281//macrophage activation involved in immune response;GO:0006906//vesicle fusion;GO:0007009//plasma membrane organization;GO:0033292//T-tubule organization;GO:0050765//negative regulation of phagocytosis;GO:0061025//membrane fusion	--
ENSG00000186654	0.602049	0.0376491	0.999113	PRR5	proline rich 5 [Source:HGNC Symbol;Acc:HGNC:31682]	Environmental Information Processing	Signal transduction	ko04150//mTOR signaling pathway	K20411	GO:0005829//cytosol;GO:0031932//TORC2 complex	GO:0005515//protein binding	GO:0001934//positive regulation of protein phosphorylation;GO:0006468//protein phosphorylation;GO:0007010//cytoskeleton organization;GO:0007049//cell cycle;GO:0014065//phosphatidylinositol 3-kinase signaling;GO:0014068//positive regulation of phosphatidylinositol 3-kinase signaling;GO:0016310//phosphorylation;GO:0030307//positive regulation of cell growth;GO:0031669//cellular response to nutrient…	--
ENSG00000185838	0.605572	0.0490482	0.999113	GNB1L	G protein subunit beta 1 like [Source:HGNC Symbol;Acc:HGNC:4397]	-	-	-	-	-	GO:0003674//molecular_function;GO:0005515//protein binding	-	--
ENSG00000128203	0.605854	0.0261675	0.999113	ASPHD2	aspartate beta-hydroxylase domain containing 2 [Source:HGNC Symbol;Acc:HGNC:30437]	-	-	-	-	GO:0016020//membrane	GO:0016491//oxidoreductase activity;GO:0046872//metal ion binding;GO:0051213//dioxygenase activity	GO:0018193//peptidyl-amino acid modification	--
ENSG00000170561	0.609229	0.0438686	0.999113	IRX2	iroquois homeobox 2 [Source:HGNC Symbol;Acc:HGNC:14359]	-	-	-	-	GO:0000785//chromatin;GO:0005634//nucleus	GO:0000978//RNA polymerase II cis-regulatory region sequence-specific DNA binding;GO:0000981//DNA-binding transcription factor activity, RNA polymerase II-specific;GO:0001227//DNA-binding transcription repressor activity, RNA polymerase II-specific;GO:0003677//DNA binding;GO:0005515//protein binding;GO:0043565//sequence-specific DNA binding	GO:0000122//negative regulation of transcription by RNA polymerase II;GO:0001656//metanephros development;GO:0006355//regulation of transcription, DNA-templated;GO:0006357//regulation of transcription by RNA polymerase II;GO:0030182//neuron differentiation;GO:0048468//cell development;GO:0072086//specification of loop of Henle identity;GO:0072272//proximal/distal pattern formation involved in met…	Homeobox
ENSG00000137309	0.613005	0.0188388	0.999113	HMGA1	high mobility group AT-hook 1 [Source:HGNC Symbol;Acc:HGNC:5010]	-	-	-	-	GO:0000785//chromatin;GO:0005634//nucleus;GO:0005654//nucleoplasm;GO:0005667//transcription regulator complex;GO:0005694//chromosome;GO:0005829//cytosol;GO:0005925//focal adhesion;GO:0035985//senescence-associated heterochromatin focus;GO:0090575//RNA polymerase II transcription regulator complex	GO:0000978//RNA polymerase II cis-regulatory region sequence-specific DNA binding;GO:0000987//cis-regulatory region sequence-specific DNA binding;GO:0001221//transcription coregulator binding;GO:0003677//DNA binding;GO:0003680//minor groove of adenine-thymine-rich DNA binding;GO:0003682//chromatin binding;GO:0003712//transcription coregulator activity;GO:0003713//transcription coactivator activit…	GO:0006268//DNA unwinding involved in DNA replication;GO:0006284//base-excision repair;GO:0006337//nucleosome disassembly;GO:0006351//transcription, DNA-templated;GO:0006355//regulation of transcription, DNA-templated;GO:0008285//negative regulation of cell population proliferation;GO:0045892//negative regulation of transcription, DNA-templated;GO:0045893//positive regulation of transcription, DN…	HMGA
ENSG00000196275	0.620026	0.0218427	0.999113	GTF2IRD2	GTF2I repeat domain containing 2 [Source:HGNC Symbol;Acc:HGNC:30775]	-	-	-	-	GO:0005634//nucleus;GO:0005654//nucleoplasm	GO:0000981//DNA-binding transcription factor activity, RNA polymerase II-specific;GO:0003677//DNA binding;GO:0005515//protein binding	GO:0006357//regulation of transcription by RNA polymerase II	GTF2I
ENSG00000171246	0.622007	0.0472879	0.999113	NPTX1	neuronal pentraxin 1 [Source:HGNC Symbol;Acc:HGNC:7952]	-	-	-	-	GO:0005737//cytoplasm;GO:0005739//mitochondrion;GO:0005886//plasma membrane;GO:0030133//transport vesicle;GO:0031410//cytoplasmic vesicle;GO:0043005//neuron projection;GO:0043083//synaptic cleft;GO:0098978//glutamatergic synapse	GO:0046872//metal ion binding	GO:0006839//mitochondrial transport;GO:0007268//chemical synaptic transmission;GO:0007417//central nervous system development;GO:0035865//cellular response to potassium ion;GO:0043653//mitochondrial fragmentation involved in apoptotic process;GO:0060385//axonogenesis involved in innervation;GO:0071333//cellular response to glucose stimulus;GO:0097107//postsynaptic density assembly;GO:0098962//reg…	--
ENSG00000185453	0.625254	0.00947318	0.999113	ZSWIM9	zinc finger SWIM-type containing 9 [Source:HGNC Symbol;Acc:HGNC:34495]	-	-	-	-	-	GO:0005515//protein binding;GO:0008270//zinc ion binding	-	--
ENSG00000183696	0.627465	0.0221334	0.999113	UPP1	uridine phosphorylase 1 [Source:HGNC Symbol;Acc:HGNC:12576]	Metabolism;Metabolism;Metabolism	Global and overview maps;Xenobiotics biodegradation and metabolism;Nucleotide metabolism	ko01100//Metabolic pathways;ko00983//Drug metabolism - other enzymes;ko00240//Pyrimidine metabolism	K00757;K00757;K00757	GO:0005654//nucleoplasm;GO:0005737//cytoplasm;GO:0005829//cytosol	GO:0003824//catalytic activity;GO:0004850//uridine phosphorylase activity;GO:0009032//thymidine phosphorylase activity;GO:0016740//transferase activity;GO:0016757//glycosyltransferase activity;GO:0016763//pentosyltransferase activity;GO:0042802//identical protein binding;GO:0047847//deoxyuridine phosphorylase activity	GO:0006139//nucleobase-containing compound metabolic process;GO:0006218//uridine catabolic process;GO:0006220//pyrimidine nucleotide metabolic process;GO:0006248//CMP catabolic process;GO:0006249//dCMP catabolic process;GO:0009116//nucleoside metabolic process;GO:0009164//nucleoside catabolic process;GO:0009166//nucleotide catabolic process;GO:0042149//cellular response to glucose starvation;GO:0…	--
ENSG00000173156	0.629469	0.0151091	0.999113	RHOD	ras homolog family member D [Source:HGNC Symbol;Acc:HGNC:670]	Organismal Systems	Development and regeneration	ko04360//Axon guidance	K07530	GO:0000139//Golgi membrane;GO:0005741//mitochondrial outer membrane;GO:0005768//endosome;GO:0005769//early endosome;GO:0005829//cytosol;GO:0005856//cytoskeleton;GO:0005886//plasma membrane;GO:0005938//cell cortex;GO:0010008//endosome membrane;GO:0016020//membrane;GO:0031410//cytoplasmic vesicle;GO:0042995//cell projection	GO:0000166//nucleotide binding;GO:0003924//GTPase activity;GO:0005085//guanyl-nucleotide exchange factor activity;GO:0005525//GTP binding;GO:0019901//protein kinase binding	GO:0007015//actin filament organization;GO:0007163//establishment or maintenance of cell polarity;GO:0007264//small GTPase mediated signal transduction;GO:0007266//Rho protein signal transduction;GO:0008360//regulation of cell shape;GO:0016477//cell migration;GO:0030032//lamellipodium assembly;GO:0030335//positive regulation of cell migration;GO:0030865//cortical cytoskeleton organization;GO:0032…	--
ENSG00000112039	0.635373	0.022199	0.999113	FANCE	FA complementation group E [Source:HGNC Symbol;Acc:HGNC:3586]	Genetic Information Processing	Replication and repair	ko03460//Fanconi anemia pathway	K10892	GO:0000785//chromatin;GO:0005634//nucleus;GO:0005654//nucleoplasm;GO:0043240//Fanconi anaemia nuclear complex	GO:0003674//molecular_function	GO:0006281//DNA repair;GO:0006513//protein monoubiquitination;GO:0006974//cellular response to DNA damage stimulus;GO:0036297//interstrand cross-link repair	--
ENSG00000176473	0.645339	0.0409114	0.999113	WDR25	WD repeat domain 25 [Source:HGNC Symbol;Acc:HGNC:21064]	-	-	-	-	-	GO:0005515//protein binding	-	--
ENSG00000101255	0.661782	0.0257888	0.999113	TRIB3	tribbles pseudokinase 3 [Source:HGNC Symbol;Acc:HGNC:16228]	Human Diseases	Endocrine and metabolic disease	ko04931//Insulin resistance	K19518	GO:0005634//nucleus;GO:0005654//nucleoplasm;GO:0005829//cytosol;GO:0005886//plasma membrane	GO:0003714//transcription corepressor activity;GO:0004672//protein kinase activity;GO:0004860//protein kinase inhibitor activity;GO:0005515//protein binding;GO:0005524//ATP binding;GO:0019899//enzyme binding;GO:0019901//protein kinase binding;GO:0031434//mitogen-activated protein kinase kinase binding;GO:0031625//ubiquitin protein ligase binding;GO:0055106//ubiquitin-protein transferase regulator…	GO:0000122//negative regulation of transcription by RNA polymerase II;GO:0006468//protein phosphorylation;GO:0006469//negative regulation of protein kinase activity;GO:0006915//apoptotic process;GO:0010506//regulation of autophagy;GO:0010827//regulation of glucose transmembrane transport;GO:0032092//positive regulation of protein binding;GO:0032436//positive regulation of proteasomal ubiquitin-de…	--
ENSG00000008513	0.663418	0.0455371	0.999113	ST3GAL1	ST3 beta-galactoside alpha-2,3-sialyltransferase 1 [Source:HGNC Symbol;Acc:HGNC:10862]	Metabolism;Metabolism;Metabolism;Metabolism;Metabolism	Global and overview maps;Glycan biosynthesis and metabolism;Glycan biosynthesis and metabolism;Glycan biosynthesis and metabolism;Glycan biosynthesis and metabolism	ko01100//Metabolic pathways;ko00512//Mucin type O-glycan biosynthesis;ko00604//Glycosphingolipid biosynthesis - ganglio series;ko00603//Glycosphingolipid biosynthesis - globo and isoglobo series;ko00533//Glycosaminoglycan biosynthesis - keratan sulfate	K00780;K00780;K00780;K00780;K00780	GO:0000139//Golgi membrane;GO:0005576//extracellular region;GO:0005794//Golgi apparatus;GO:0016020//membrane;GO:0032580//Golgi cisterna membrane;GO:0032588//trans-Golgi network membrane;GO:0070062//extracellular exosome;GO:1990675//Golgi medial cisterna membrane;GO:1990676//Golgi trans cisterna membrane	GO:0003836//beta-galactoside (CMP) alpha-2,3-sialyltransferase activity;GO:0008373//sialyltransferase activity;GO:0016740//transferase activity;GO:0016757//glycosyltransferase activity;GO:0047288//monosialoganglioside sialyltransferase activity	GO:0002319//memory B cell differentiation;GO:0006054//N-acetylneuraminate metabolic process;GO:0006468//protein phosphorylation;GO:0006486//protein glycosylation;GO:0006487//protein N-linked glycosylation;GO:0006629//lipid metabolic process;GO:0010706//ganglioside biosynthetic process via lactosylceramide;GO:0016266//O-glycan processing;GO:0018146//keratan sulfate biosynthetic process;GO:0019082/…	--
ENSG00000130766	0.666145	0.0344744	0.999113	SESN2	sestrin 2 [Source:HGNC Symbol;Acc:HGNC:20746]	Environmental Information Processing;Organismal Systems;Cellular Processes	Signal transduction;Aging;Cell growth and death	ko04150//mTOR signaling pathway;ko04211//Longevity regulating pathway;ko04115//p53 signaling pathway	K20394;K20394;K20394	GO:0005634//nucleus;GO:0005737//cytoplasm;GO:0005739//mitochondrion;GO:0005829//cytosol;GO:0031588//nucleotide-activated protein kinase complex;GO:0031932//TORC2 complex;GO:1990316//Atg1/ULK1 kinase complex	GO:0004601//peroxidase activity;GO:0005092//GDP-dissociation inhibitor activity;GO:0005515//protein binding;GO:0016491//oxidoreductase activity;GO:0016684//oxidoreductase activity, acting on peroxide as acceptor;GO:0032542//sulfiredoxin activity;GO:0042731//PH domain binding;GO:0044877//protein-containing complex binding;GO:0070728//leucine binding;GO:0140311//protein sequestering activity	GO:0001932//regulation of protein phosphorylation;GO:0006111//regulation of gluconeogenesis;GO:0006635//fatty acid beta-oxidation;GO:0007005//mitochondrion organization;GO:0009749//response to glucose;GO:0016239//positive regulation of macroautophagy;GO:0030308//negative regulation of cell growth;GO:0030330//DNA damage response, signal transduction by p53 class mediator;GO:0032042//mitochondrial …	--
ENSG00000010810	0.66993	0.0393188	0.999113	FYN	FYN proto-oncogene, Src family tyrosine kinase [Source:HGNC Symbol;Acc:HGNC:4037]	Human Diseases;Human Diseases;Environmental Information Processing;Cellular Processes;Organismal Systems;Organismal Systems;Organismal Systems;Human Diseases;Organismal Systems;Organismal Systems;Environmental Information Processing;Organismal Systems;Organismal Systems;Cellular Processes	Neurodegenerative disease;Infectious disease: bacterial;Signal transduction;Cellular community - eukaryotes;Immune system;Development and regeneration;Immune system;Cardiovascular disease;Development and regeneration;Immune system;Signal transduction;Nervous system;Immune system;Cellular community - eukaryotes	ko05020//Prion disease;ko05130//Pathogenic Escherichia coli infection;ko04072//Phospholipase D signaling pathway;ko04510//Focal adhesion;ko04650//Natural killer cell mediated cytotoxicity;ko04360//Axon guidance;ko04664//Fc epsilon RI signaling pathway;ko05416//Viral myocarditis;ko04380//Osteoclast differentiation;ko04611//Platelet activation;ko04071//Sphingolipid signaling pathway;ko04725//Cholin…	K05703;K05703;K05703;K05703;K05703;K05703;K05703;K05703;K05703;K05703;K05703;K05703;K05703;K05703	GO:0005634//nucleus;GO:0005737//cytoplasm;GO:0005739//mitochondrion;GO:0005768//endosome;GO:0005829//cytosol;GO:0005884//actin filament;GO:0005886//plasma membrane;GO:0014069//postsynaptic density;GO:0016020//membrane;GO:0030425//dendrite;GO:0031234//extrinsic component of cytoplasmic side of plasma membrane;GO:0043204//perikaryon;GO:0044297//cell body;GO:0045121//membrane raft;GO:0048471//perinu…	GO:0000166//nucleotide binding;GO:0001664//G protein-coupled receptor binding;GO:0004672//protein kinase activity;GO:0004713//protein tyrosine kinase activity;GO:0004715//non-membrane spanning protein tyrosine kinase activity;GO:0005102//signaling receptor binding;GO:0005515//protein binding;GO:0005524//ATP binding;GO:0015631//tubulin binding;GO:0016004//phospholipase activator activity;GO:001630…	GO:0000304//response to singlet oxygen;GO:0001764//neuron migration;GO:0002223//stimulatory C-type lectin receptor signaling pathway;GO:0002250//adaptive immune response;GO:0002376//immune system process;GO:0002862//negative regulation of inflammatory response to antigenic stimulus;GO:0003015//heart process;GO:0006468//protein phosphorylation;GO:0006816//calcium ion transport;GO:0006897//endocyto…	--
ENSG00000168209	0.677422	0.0461087	0.999113	DDIT4	DNA damage inducible transcript 4 [Source:HGNC Symbol;Acc:HGNC:24944]	Environmental Information Processing;Human Diseases;Environmental Information Processing;Cellular Processes	Signal transduction;Cancer: overview;Signal transduction;Transport and catabolism	ko04151//PI3K-Akt signaling pathway;ko05206//MicroRNAs in cancer;ko04150//mTOR signaling pathway;ko04140//Autophagy - animal	K08270;K08270;K08270;K08270	GO:0005737//cytoplasm;GO:0005739//mitochondrion;GO:0005829//cytosol	GO:0005515//protein binding;GO:0071889//14-3-3 protein binding	GO:0001666//response to hypoxia;GO:0001764//neuron migration;GO:0006915//apoptotic process;GO:0007420//brain development;GO:0009968//negative regulation of signal transduction;GO:0010801//negative regulation of peptidyl-threonine phosphorylation;GO:0030182//neuron differentiation;GO:0032006//regulation of TOR signaling;GO:0032007//negative regulation of TOR signaling;GO:0032984//protein-containin…	--
ENSG00000133069	0.678362	0.0393735	0.999113	TMCC2	transmembrane and coiled-coil domain family 2 [Source:HGNC Symbol;Acc:HGNC:24239]	-	-	-	-	GO:0005783//endoplasmic reticulum;GO:0005789//endoplasmic reticulum membrane;GO:0012505//endomembrane system;GO:0016020//membrane	GO:0005515//protein binding	GO:0042982//amyloid precursor protein metabolic process	--
ENSG00000204237	0.701926	0.00905588	0.999113	OXLD1	oxidoreductase like domain containing 1 [Source:HGNC Symbol;Acc:HGNC:27901]	-	-	-	-	-	-	-	--
ENSG00000183655	0.714404	0.0304369	0.999113	KLHL25	kelch like family member 25 [Source:HGNC Symbol;Acc:HGNC:25732]	-	-	-	-	GO:0005737//cytoplasm;GO:0005829//cytosol;GO:0031463//Cul3-RING ubiquitin ligase complex	GO:0005515//protein binding;GO:1990756//ubiquitin ligase-substrate adaptor activity	GO:0006417//regulation of translation;GO:0006446//regulation of translational initiation;GO:0006511//ubiquitin-dependent protein catabolic process;GO:0016567//protein ubiquitination;GO:0032831//positive regulation of CD4-positive, CD25-positive, alpha-beta regulatory T cell differentiation;GO:0045717//negative regulation of fatty acid biosynthetic process;GO:0046321//positive regulation of fatty …	--
ENSG00000128510	0.716576	0.0463581	0.999113	CPA4	carboxypeptidase A4 [Source:HGNC Symbol;Acc:HGNC:15740]	-	-	-	-	GO:0005575//cellular_component;GO:0005576//extracellular region;GO:0005615//extracellular space	GO:0004180//carboxypeptidase activity;GO:0004181//metallocarboxypeptidase activity;GO:0005515//protein binding;GO:0008233//peptidase activity;GO:0008237//metallopeptidase activity;GO:0008270//zinc ion binding;GO:0016787//hydrolase activity;GO:0046872//metal ion binding	GO:0006508//proteolysis;GO:0016573//histone acetylation	--
ENSG00000128191	0.721653	0.0192805	0.999113	DGCR8	DGCR8 microprocessor complex subunit [Source:HGNC Symbol;Acc:HGNC:2847]	-	-	-	-	GO:0005634//nucleus;GO:0005654//nucleoplasm;GO:0005730//nucleolus;GO:0005737//cytoplasm;GO:0005829//cytosol;GO:0014069//postsynaptic density;GO:0016604//nuclear body;GO:0070877//microprocessor complex;GO:0098978//glutamatergic synapse	GO:0003723//RNA binding;GO:0003725//double-stranded RNA binding;GO:0005515//protein binding;GO:0020037//heme binding;GO:0042802//identical protein binding;GO:0042803//protein homodimerization activity;GO:0046872//metal ion binding;GO:0070878//primary miRNA binding;GO:0140517//protein-RNA adaptor activity	GO:0031053//primary miRNA processing;GO:0072091//regulation of stem cell proliferation	--
ENSG00000072163	0.759711	0.0306849	0.999113	LIMS2	LIM zinc finger domain containing 2 [Source:HGNC Symbol;Acc:HGNC:16084]	-	-	-	-	GO:0005634//nucleus;GO:0005737//cytoplasm;GO:0005829//cytosol;GO:0005886//plasma membrane;GO:0005911//cell-cell junction;GO:0005925//focal adhesion;GO:0016020//membrane;GO:0070161//anchoring junction;GO:0110165//cellular anatomical entity	GO:0005515//protein binding;GO:0046872//metal ion binding	GO:0007229//integrin-mediated signaling pathway;GO:0043066//negative regulation of apoptotic process;GO:0045216//cell-cell junction organization;GO:0061351//neural precursor cell proliferation;GO:0098609//cell-cell adhesion;GO:1900026//positive regulation of substrate adhesion-dependent cell spreading;GO:1904055//negative regulation of cholangiocyte proliferation;GO:1990705//cholangiocyte prolife…	--
ENSG00000180035	0.759859	0.0048655	0.999113	ZNF48	zinc finger protein 48 [Source:HGNC Symbol;Acc:HGNC:13114]	-	-	-	-	GO:0005634//nucleus	GO:0000978//RNA polymerase II cis-regulatory region sequence-specific DNA binding;GO:0001228//DNA-binding transcription activator activity, RNA polymerase II-specific;GO:0003677//DNA binding;GO:0005515//protein binding;GO:0042802//identical protein binding;GO:0046872//metal ion binding	GO:0006357//regulation of transcription by RNA polymerase II;GO:0045944//positive regulation of transcription by RNA polymerase II	zf-C2H2
ENSG00000254870	0.817173	0.015007	0.999113	ATP6V1G2-DDX39B	ATP6V1G2-DDX39B readthrough (NMD candidate) [Source:HGNC Symbol;Acc:HGNC:41999]	-	-	-	-	GO:0016471//vacuolar proton-transporting V-type ATPase complex	GO:0046961//proton-transporting ATPase activity, rotational mechanism	GO:0006811//ion transport;GO:1902600//proton transmembrane transport	--
ENSG00000256029	0.878078	0.044818	0.999113	--	novel protein	-	-	-	-	-	-	-	--
ENSG00000140044	0.904061	0.0494544	0.999113	JDP2	Jun dimerization protein 2 [Source:HGNC Symbol;Acc:HGNC:17546]	-	-	-	-	GO:0000785//chromatin;GO:0005634//nucleus;GO:0090575//RNA polymerase II transcription regulator complex	GO:0000978//RNA polymerase II cis-regulatory region sequence-specific DNA binding;GO:0000981//DNA-binding transcription factor activity, RNA polymerase II-specific;GO:0001227//DNA-binding transcription repressor activity, RNA polymerase II-specific;GO:0003677//DNA binding;GO:0003682//chromatin binding;GO:0003700//DNA-binding transcription factor activity;GO:0005515//protein binding;GO:0035497//cA…	GO:0000122//negative regulation of transcription by RNA polymerase II;GO:0006355//regulation of transcription, DNA-templated;GO:0006357//regulation of transcription by RNA polymerase II;GO:0031063//regulation of histone deacetylation;GO:0031065//positive regulation of histone deacetylation;GO:0045444//fat cell differentiation;GO:0045599//negative regulation of fat cell differentiation	TF_bZIP
ENSG00000141448	0.912459	0.0142526	0.999113	GATA6	GATA binding protein 6 [Source:HGNC Symbol;Acc:HGNC:4174]	-	-	-	-	GO:0000785//chromatin;GO:0005634//nucleus;GO:0005654//nucleoplasm;GO:0005667//transcription regulator complex;GO:0031965//nuclear membrane	GO:0000976//transcription cis-regulatory region binding;GO:0000978//RNA polymerase II cis-regulatory region sequence-specific DNA binding;GO:0000981//DNA-binding transcription factor activity, RNA polymerase II-specific;GO:0000987//cis-regulatory region sequence-specific DNA binding;GO:0001223//transcription coactivator binding;GO:0003677//DNA binding;GO:0003682//chromatin binding;GO:0003690//dou…	GO:0000122//negative regulation of transcription by RNA polymerase II;GO:0001701//in utero embryonic development;GO:0001889//liver development;GO:0001949//sebaceous gland cell differentiation;GO:0002759//regulation of antimicrobial humoral response;GO:0003148//outflow tract septum morphogenesis;GO:0003162//atrioventricular node development;GO:0003163//sinoatrial node development;GO:0003309//type …	zf-GATA
ENSG00000166289	0.941077	0.00569574	0.999113	PLEKHF1	pleckstrin homology and FYVE domain containing 1 [Source:HGNC Symbol;Acc:HGNC:20764]	-	-	-	-	GO:0005634//nucleus;GO:0005737//cytoplasm;GO:0005764//lysosome;GO:0005765//lysosomal membrane;GO:0005768//endosome;GO:0005769//early endosome;GO:0010008//endosome membrane;GO:0048471//perinuclear region of cytoplasm	GO:0005515//protein binding;GO:0010314//phosphatidylinositol-5-phosphate binding;GO:0032266//phosphatidylinositol-3-phosphate binding;GO:0035091//phosphatidylinositol binding;GO:0046872//metal ion binding;GO:0070273//phosphatidylinositol-4-phosphate binding	GO:0006915//apoptotic process;GO:0007032//endosome organization;GO:0008333//endosome to lysosome transport;GO:0010508//positive regulation of autophagy;GO:0016050//vesicle organization;GO:0072659//protein localization to plasma membrane;GO:2001244//positive regulation of intrinsic apoptotic signaling pathway	--
ENSG00000241404	0.943904	0.0495704	0.999113	EGFL8	EGF like domain multiple 8 [Source:HGNC Symbol;Acc:HGNC:13944]	-	-	-	-	GO:0005576//extracellular region;GO:0009986//cell surface	GO:0005102//signaling receptor binding;GO:0005509//calcium ion binding;GO:0005515//protein binding	GO:0048856//anatomical structure development	--
ENSG00000136378	0.955074	0.0414692	0.999113	ADAMTS7	ADAM metallopeptidase with thrombospondin type 1 motif 7 [Source:HGNC Symbol;Acc:HGNC:223]	-	-	-	-	GO:0005576//extracellular region;GO:0005788//endoplasmic reticulum lumen;GO:0009986//cell surface;GO:0031012//extracellular matrix	GO:0004222//metalloendopeptidase activity;GO:0005515//protein binding;GO:0008233//peptidase activity;GO:0008237//metallopeptidase activity;GO:0016787//hydrolase activity;GO:0046872//metal ion binding	GO:0001503//ossification;GO:0002062//chondrocyte differentiation;GO:0006029//proteoglycan metabolic process;GO:0006508//proteolysis;GO:0030198//extracellular matrix organization;GO:0030199//collagen fibril organization;GO:0032331//negative regulation of chondrocyte differentiation;GO:0043931//ossification involved in bone maturation;GO:0051603//proteolysis involved in cellular protein catabolic p…	--
ENSG00000128165	0.963881	0.0329342	0.999113	ADM2	adrenomedullin 2 [Source:HGNC Symbol;Acc:HGNC:28898]	Environmental Information Processing;Organismal Systems	Signaling molecules and interaction;Circulatory system	ko04080//Neuroactive ligand-receptor interaction;ko04270//Vascular smooth muscle contraction	K25343;K25343	GO:0005576//extracellular region	GO:0005179//hormone activity;GO:0044877//protein-containing complex binding	GO:0001525//angiogenesis;GO:0003073//regulation of systemic arterial blood pressure;GO:0006468//protein phosphorylation;GO:0007189//adenylate cyclase-activating G protein-coupled receptor signaling pathway;GO:0007586//digestion;GO:0007631//feeding behavior;GO:0010460//positive regulation of heart rate;GO:0010628//positive regulation of gene expression;GO:0045766//positive regulation of angiogenes…	--
ENSG00000188910	0.975528	0.0277681	0.999113	GJB3	gap junction protein beta 3 [Source:HGNC Symbol;Acc:HGNC:4285]	-	-	-	-	GO:0005737//cytoplasm;GO:0005886//plasma membrane;GO:0005911//cell-cell junction;GO:0005921//gap junction;GO:0005922//connexin complex;GO:0016020//membrane;GO:0030054//cell junction;GO:0043231//intracellular membrane-bounded organelle;GO:0070161//anchoring junction	GO:0005243//gap junction channel activity;GO:0005515//protein binding	GO:0001701//in utero embryonic development;GO:0001890//placenta development;GO:0007154//cell communication;GO:0007267//cell-cell signaling;GO:0007283//spermatogenesis;GO:0043588//skin development;GO:0055085//transmembrane transport;GO:0071300//cellular response to retinoic acid	--
ENSG00000285901	1.00312	0.00106534	0.999113	CCND2	novel transcript	Human Diseases;Environmental Information Processing;Human Diseases;Human Diseases;Human Diseases;Human Diseases;Cellular Processes;Human Diseases;Environmental Information Processing;Human Diseases;Environmental Information Processing;Cellular Processes;Environmental Information Processing;Human Diseases;Environmental Information Processing;Cellular Processes;Organismal Systems;Cellular Processes…	Cancer: overview;Signal transduction;Infectious disease: viral;Infectious disease: viral;Cancer: overview;Infectious disease: viral;Cellular community - eukaryotes;Cancer: overview;Signal transduction;Cancer: overview;Signal transduction;Cell growth and death;Signal transduction;Infectious disease: viral;Signal transduction;Cell growth and death;Endocrine system;Cell growth and death;Signal trans…	ko05200//Pathways in cancer;ko04151//PI3K-Akt signaling pathway;ko05165//Human papillomavirus infection;ko05169//Epstein-Barr virus infection;ko05202//Transcriptional misregulation in cancer;ko05166//Human T-cell leukemia virus 1 infection;ko04510//Focal adhesion;ko05203//Viral carcinogenesis;ko04310//Wnt signaling pathway;ko05206//MicroRNAs in cancer;ko04630//JAK-STAT signaling pathway;ko04218//…	K10151;K10151;K10151;K10151;K10151;K10151;K10151;K10151;K10151;K10151;K10151;K10151;K10151;K10151;K10151;K10151;K10151;K10151;K10151	GO:0005634//nucleus;GO:0005737//cytoplasm	-	-	--
ENSG00000183153	1.03051	0.0169815	0.999113	GJD3	gap junction protein delta 3 [Source:HGNC Symbol;Acc:HGNC:19147]	-	-	-	-	GO:0005886//plasma membrane;GO:0005921//gap junction;GO:0005922//connexin complex;GO:0009986//cell surface;GO:0016020//membrane;GO:0070161//anchoring junction	GO:0005216//ion channel activity;GO:0005243//gap junction channel activity;GO:0005515//protein binding;GO:0086077//gap junction channel activity involved in AV node cell-bundle of His cell electrical coupling	GO:0007154//cell communication;GO:0007267//cell-cell signaling;GO:0009749//response to glucose;GO:0010459//negative regulation of heart rate;GO:0016264//gap junction assembly;GO:0034220//ion transmembrane transport;GO:0055085//transmembrane transport;GO:0086053//AV node cell to bundle of His cell communication by electrical coupling;GO:1901845//negative regulation of cell communication by electri…	--
ENSG00000152669	1.05363	0.00844217	0.999113	CCNO	cyclin O [Source:HGNC Symbol;Acc:HGNC:18576]	-	-	-	-	GO:0000307//cyclin-dependent protein kinase holoenzyme complex;GO:0005634//nucleus;GO:0005730//nucleolus;GO:0005737//cytoplasm;GO:0097124//cyclin A2-CDK2 complex	GO:0005515//protein binding;GO:0016538//cyclin-dependent protein serine/threonine kinase regulator activity	GO:0000079//regulation of cyclin-dependent protein serine/threonine kinase activity;GO:0000278//mitotic cell cycle;GO:0007049//cell cycle;GO:0009410//response to xenobiotic stimulus;GO:0030030//cell projection organization;GO:0044772//mitotic cell cycle phase transition;GO:0051301//cell division;GO:0060271//cilium assembly;GO:1903251//multi-ciliated epithelial cell differentiation	--
ENSG00000148680	1.13245	0.0437554	0.999113	HTR7	5-hydroxytryptamine receptor 7 [Source:HGNC Symbol;Acc:HGNC:5302]	Environmental Information Processing;Environmental Information Processing;Environmental Information Processing;Organismal Systems;Organismal Systems	Signaling molecules and interaction;Signal transduction;Signal transduction;Nervous system;Development and regeneration	ko04080//Neuroactive ligand-receptor interaction;ko04020//Calcium signaling pathway;ko04014//Ras signaling pathway;ko04726//Serotonergic synapse;ko04361//Axon regeneration	K04163;K04163;K04163;K04163;K04163	GO:0005886//plasma membrane;GO:0005887//integral component of plasma membrane;GO:0016020//membrane;GO:0016021//integral component of membrane;GO:0030425//dendrite;GO:0032588//trans-Golgi network membrane;GO:0045202//synapse	GO:0004930//G protein-coupled receptor activity;GO:0004993//G protein-coupled serotonin receptor activity;GO:0005515//protein binding;GO:0030594//neurotransmitter receptor activity	GO:0006939//smooth muscle contraction;GO:0007165//signal transduction;GO:0007186//G protein-coupled receptor signaling pathway;GO:0007187//G protein-coupled receptor signaling pathway, coupled to cyclic nucleotide second messenger;GO:0007268//chemical synaptic transmission;GO:0007623//circadian rhythm;GO:0008015//blood circulation;GO:0042310//vasoconstriction;GO:0098664//G protein-coupled seroton…	--
ENSG00000140450	1.17406	0.0476635	0.999113	ARRDC4	arrestin domain containing 4 [Source:HGNC Symbol;Acc:HGNC:28087]	-	-	-	-	GO:0005737//cytoplasm;GO:0005768//endosome;GO:0005769//early endosome;GO:0005886//plasma membrane;GO:0016020//membrane;GO:0031410//cytoplasmic vesicle;GO:0043231//intracellular membrane-bounded organelle;GO:1903561//extracellular vesicle	GO:0005515//protein binding;GO:1990756//ubiquitin ligase-substrate adaptor activity	GO:0015031//protein transport;GO:0016567//protein ubiquitination;GO:0051443//positive regulation of ubiquitin-protein transferase activity;GO:0140112//extracellular vesicle biogenesis	--
ENSG00000124635	1.1759	0.0225622	0.999113	H2BC11	H2B clustered histone 11 [Source:HGNC Symbol;Acc:HGNC:4761]	Organismal Systems;Human Diseases;Human Diseases;Human Diseases	Immune system;Immune disease;Cancer: overview;Substance dependence	ko04613//Neutrophil extracellular trap formation;ko05322//Systemic lupus erythematosus;ko05203//Viral carcinogenesis;ko05034//Alcoholism	K11252;K11252;K11252;K11252	GO:0000786//nucleosome;GO:0005615//extracellular space;GO:0005634//nucleus;GO:0005654//nucleoplasm;GO:0005694//chromosome;GO:0005829//cytosol;GO:0005886//plasma membrane;GO:0043229//intracellular organelle;GO:0043505//CENP-A containing nucleosome	GO:0001530//lipopolysaccharide binding;GO:0003677//DNA binding;GO:0005515//protein binding;GO:0030527//structural constituent of chromatin;GO:0046982//protein heterodimerization activity	GO:0002227//innate immune response in mucosa;GO:0006334//nucleosome assembly;GO:0010804//negative regulation of tumor necrosis factor-mediated signaling pathway;GO:0019731//antibacterial humoral response;GO:0031640//killing of cells of other organism;GO:0042742//defense response to bacterium;GO:0050829//defense response to Gram-negative bacterium;GO:0050830//defense response to Gram-positive bact…	--
ENSG00000139278	1.23023	0.0428925	0.999113	GLIPR1	GLI pathogenesis related 1 [Source:HGNC Symbol;Acc:HGNC:17001]	-	-	-	-	GO:0005576//extracellular region;GO:0005615//extracellular space;GO:0005886//plasma membrane;GO:0016020//membrane;GO:0035577//azurophil granule membrane	GO:0005515//protein binding	-	--
ENSG00000173805	1.2645	0.0364187	0.999113	HAP1	huntingtin associated protein 1 [Source:HGNC Symbol;Acc:HGNC:4812]	Human Diseases;Human Diseases;Human Diseases;Organismal Systems	Neurodegenerative disease;Neurodegenerative disease;Neurodegenerative disease;Nervous system	ko05022//Pathways of neurodegeneration - multiple diseases;ko05014//Amyotrophic lateral sclerosis;ko05016//Huntington disease;ko04727//GABAergic synapse	K04647;K04647;K04647;K04647	GO:0005634//nucleus;GO:0005730//nucleolus;GO:0005737//cytoplasm;GO:0005739//mitochondrion;GO:0005764//lysosome;GO:0005768//endosome;GO:0005769//early endosome;GO:0005776//autophagosome;GO:0005783//endoplasmic reticulum;GO:0005813//centrosome;GO:0005814//centriole;GO:0005829//cytosol;GO:0005856//cytoskeleton;GO:0008021//synaptic vesicle;GO:0015629//actin cytoskeleton;GO:0016234//inclusion body;GO:…	GO:0005102//signaling receptor binding;GO:0005515//protein binding;GO:0017022//myosin binding;GO:0044325//transmembrane transporter binding;GO:0048403//brain-derived neurotrophic factor binding	GO:0006605//protein targeting;GO:0006887//exocytosis;GO:0006914//autophagy;GO:0007268//chemical synaptic transmission;GO:0007420//brain development;GO:0008089//anterograde axonal transport;GO:0008090//retrograde axonal transport;GO:0008104//protein localization;GO:0015031//protein transport;GO:0017157//regulation of exocytosis;GO:0021549//cerebellum development;GO:0021979//hypothalamus cell diffe…	--
ENSG00000123892	1.26647	0.0285409	0.999113	RAB38	RAB38, member RAS oncogene family [Source:HGNC Symbol;Acc:HGNC:9776]	-	-	-	-	GO:0005737//cytoplasm;GO:0005739//mitochondrion;GO:0005764//lysosome;GO:0005769//early endosome;GO:0005783//endoplasmic reticulum;GO:0005794//Golgi apparatus;GO:0005802//trans-Golgi network;GO:0005829//cytosol;GO:0005886//plasma membrane;GO:0012505//endomembrane system;GO:0016020//membrane;GO:0030670//phagocytic vesicle membrane;GO:0031410//cytoplasmic vesicle;GO:0031982//vesicle;GO:0033162//mela…	GO:0000166//nucleotide binding;GO:0003924//GTPase activity;GO:0005515//protein binding;GO:0005525//GTP binding;GO:0030742//GTP-dependent protein binding;GO:0035650//AP-1 adaptor complex binding;GO:0035651//AP-3 adaptor complex binding;GO:0036461//BLOC-2 complex binding	GO:0006886//intracellular protein transport;GO:0007005//mitochondrion organization;GO:0007264//small GTPase mediated signal transduction;GO:0015031//protein transport;GO:0016192//vesicle-mediated transport;GO:0032438//melanosome organization;GO:0035646//endosome to melanosome transport;GO:0048023//positive regulation of melanin biosynthetic process;GO:0060155//platelet dense granule organization;…	--
ENSG00000087085	1.3138	0.0152359	0.999113	ACHE	acetylcholinesterase (Cartwright blood group) [Source:HGNC Symbol;Acc:HGNC:108]	Organismal Systems;Metabolism	Nervous system;Lipid metabolism	ko04725//Cholinergic synapse;ko00564//Glycerophospholipid metabolism	K01049;K01049	GO:0005576//extracellular region;GO:0005604//basement membrane;GO:0005615//extracellular space;GO:0005634//nucleus;GO:0005794//Golgi apparatus;GO:0005886//plasma membrane;GO:0009986//cell surface;GO:0016020//membrane;GO:0031594//neuromuscular junction;GO:0043083//synaptic cleft;GO:0045202//synapse;GO:0048471//perinuclear region of cytoplasm	GO:0001540//amyloid-beta binding;GO:0003990//acetylcholinesterase activity;GO:0004104//cholinesterase activity;GO:0005515//protein binding;GO:0005518//collagen binding;GO:0016787//hydrolase activity;GO:0017171//serine hydrolase activity;GO:0042166//acetylcholine binding;GO:0042802//identical protein binding;GO:0042803//protein homodimerization activity;GO:0043236//laminin binding;GO:0043621//prot…	GO:0001507//acetylcholine catabolic process in synaptic cleft;GO:0001919//regulation of receptor recycling;GO:0002076//osteoblast development;GO:0006581//acetylcholine catabolic process;GO:0007155//cell adhesion;GO:0007399//nervous system development;GO:0007416//synapse assembly;GO:0031623//receptor internalization;GO:0032223//negative regulation of synaptic transmission, cholinergic;GO:0042135//…	--
ENSG00000178093	1.31869	0.0252367	0.999113	TSSK6	testis specific serine kinase 6 [Source:HGNC Symbol;Acc:HGNC:30410]	-	-	-	-	GO:0005634//nucleus	GO:0000166//nucleotide binding;GO:0000287//magnesium ion binding;GO:0004672//protein kinase activity;GO:0004674//protein serine/threonine kinase activity;GO:0005515//protein binding;GO:0005524//ATP binding;GO:0016301//kinase activity;GO:0016740//transferase activity;GO:0044877//protein-containing complex binding;GO:0046872//metal ion binding;GO:0106310//protein serine kinase activity	GO:0006468//protein phosphorylation;GO:0007283//spermatogenesis;GO:0016310//phosphorylation;GO:0018105//peptidyl-serine phosphorylation;GO:0030154//cell differentiation;GO:0035092//sperm chromatin condensation;GO:0035556//intracellular signal transduction	--
ENSG00000177108	1.32773	0.00932132	0.999113	ZDHHC22	zinc finger DHHC-type palmitoyltransferase 22 [Source:HGNC Symbol;Acc:HGNC:20106]	-	-	-	-	GO:0000139//Golgi membrane;GO:0005783//endoplasmic reticulum;GO:0005789//endoplasmic reticulum membrane;GO:0005794//Golgi apparatus;GO:0005886//plasma membrane;GO:0016020//membrane	GO:0005515//protein binding;GO:0016409//palmitoyltransferase activity;GO:0016740//transferase activity;GO:0016746//acyltransferase activity;GO:0019706//protein-cysteine S-palmitoyltransferase activity	GO:0006612//protein targeting to membrane;GO:0018230//peptidyl-L-cysteine S-palmitoylation;GO:0018345//protein palmitoylation;GO:0072659//protein localization to plasma membrane	--
ENSG00000259305	1.48642	0.044686	0.999113	ZHX1-C8orf76	ZHX1-C8orf76 readthrough [Source:HGNC Symbol;Acc:HGNC:42975]	-	-	-	-	-	GO:0005515//protein binding	-	--
ENSG00000240038	1.5525	0.00783846	0.999113	AMY2B	amylase alpha 2B [Source:HGNC Symbol;Acc:HGNC:478]	Metabolism;Organismal Systems;Organismal Systems;Organismal Systems;Metabolism	Global and overview maps;Digestive system;Digestive system;Digestive system;Carbohydrate metabolism	ko01100//Metabolic pathways;ko04972//Pancreatic secretion;ko04970//Salivary secretion;ko04973//Carbohydrate digestion and absorption;ko00500//Starch and sucrose metabolism	K01176;K01176;K01176;K01176;K01176	GO:0005576//extracellular region;GO:0070062//extracellular exosome	GO:0003824//catalytic activity;GO:0004556//alpha-amylase activity;GO:0016160//amylase activity;GO:0016787//hydrolase activity;GO:0016798//hydrolase activity, acting on glycosyl bonds;GO:0043169//cation binding;GO:0046872//metal ion binding	GO:0005975//carbohydrate metabolic process;GO:0008152//metabolic process	--
ENSG00000147852	1.62423	0.0113264	0.999113	VLDLR	very low density lipoprotein receptor [Source:HGNC Symbol;Acc:HGNC:12698]	Human Diseases;Human Diseases	Cardiovascular disease;Neurodegenerative disease	ko05417//Lipid and atherosclerosis;ko05017//Spinocerebellar ataxia	K20053;K20053	GO:0005615//extracellular space;GO:0005765//lysosomal membrane;GO:0005886//plasma membrane;GO:0005905//clathrin-coated pit;GO:0016020//membrane;GO:0034361//very-low-density lipoprotein particle;GO:0043235//receptor complex	GO:0005041//low-density lipoprotein particle receptor activity;GO:0005509//calcium ion binding;GO:0005515//protein binding;GO:0030229//very-low-density lipoprotein particle receptor activity;GO:0034185//apolipoprotein binding;GO:0034189//very-low-density lipoprotein particle binding;GO:0038024//cargo receptor activity;GO:0038025//reelin receptor activity;GO:0048306//calcium-dependent protein bind…	GO:0006629//lipid metabolic process;GO:0006869//lipid transport;GO:0006897//endocytosis;GO:0006898//receptor-mediated endocytosis;GO:0007165//signal transduction;GO:0007399//nervous system development;GO:0007613//memory;GO:0008202//steroid metabolic process;GO:0008203//cholesterol metabolic process;GO:0021517//ventral spinal cord development;GO:0034436//glycoprotein transport;GO:0034447//very-low…	--
ENSG00000139410	1.63815	0.0071488	0.999113	SDSL	serine dehydratase like [Source:HGNC Symbol;Acc:HGNC:30404]	Metabolism;Metabolism;Metabolism;Metabolism;Metabolism;Metabolism	Global and overview maps;Global and overview maps;Global and overview maps;Amino acid metabolism;Amino acid metabolism;Amino acid metabolism	ko01100//Metabolic pathways;ko01200//Carbon metabolism;ko01230//Biosynthesis of amino acids;ko00270//Cysteine and methionine metabolism;ko00260//Glycine, serine and threonine metabolism;ko00290//Valine, leucine and isoleucine biosynthesis	K17989;K17989;K17989;K17989;K17989;K17989	GO:0005829//cytosol	GO:0003674//molecular_function;GO:0003941//L-serine ammonia-lyase activity;GO:0004794//L-threonine ammonia-lyase activity;GO:0016829//lyase activity;GO:0030170//pyridoxal phosphate binding;GO:0042802//identical protein binding	GO:0006520//cellular amino acid metabolic process;GO:0006565//L-serine catabolic process;GO:0006567//threonine catabolic process;GO:0006629//lipid metabolic process;GO:0008150//biological_process;GO:0009097//isoleucine biosynthetic process	--
ENSG00000180044	1.69718	0.0401266	0.999113	C3orf80	chromosome 3 open reading frame 80 [Source:HGNC Symbol;Acc:HGNC:40048]	-	-	-	-	GO:0016020//membrane	-	-	--
ENSG00000271503	1.71312	0.00533719	0.999113	CCL5	C-C motif chemokine ligand 5 [Source:HGNC Symbol;Acc:HGNC:10632]	Human Diseases;Environmental Information Processing;Human Diseases;Human Diseases;Human Diseases;Human Diseases;Organismal Systems;Organismal Systems;Human Diseases;Human Diseases;Environmental Information Processing;Human Diseases;Organismal Systems;Environmental Information Processing;Human Diseases;Organismal Systems	Infectious disease: viral;Signaling molecules and interaction;Neurodegenerative disease;Infectious disease: bacterial;Infectious disease: viral;Cardiovascular disease;Immune system;Immune system;Infectious disease: viral;Immune disease;Signal transduction;Infectious disease: parasitic;Immune system;Signaling molecules and interaction;Infectious disease: bacterial;Immune system	ko05168//Herpes simplex virus 1 infection;ko04060//Cytokine-cytokine receptor interaction;ko05020//Prion disease;ko05131//Shigellosis;ko05163//Human cytomegalovirus infection;ko05417//Lipid and atherosclerosis;ko04062//Chemokine signaling pathway;ko04621//NOD-like receptor signaling pathway;ko05164//Influenza A;ko05323//Rheumatoid arthritis;ko04668//TNF signaling pathway;ko05142//Chagas disease;k…	K12499;K12499;K12499;K12499;K12499;K12499;K12499;K12499;K12499;K12499;K12499;K12499;K12499;K12499;K12499;K12499	GO:0005576//extracellular region;GO:0005615//extracellular space	GO:0004435//phosphatidylinositol phospholipase C activity;GO:0004672//protein kinase activity;GO:0005125//cytokine activity;GO:0005515//protein binding;GO:0008009//chemokine activity;GO:0016004//phospholipase activator activity;GO:0030298//receptor signaling protein tyrosine kinase activator activity;GO:0031726//CCR1 chemokine receptor binding;GO:0031729//CCR4 chemokine receptor binding;GO:003173…	GO:0000165//MAPK cascade;GO:0002407//dendritic cell chemotaxis;GO:0002548//monocyte chemotaxis;GO:0002676//regulation of chronic inflammatory response;GO:0006816//calcium ion transport;GO:0006874//cellular calcium ion homeostasis;GO:0006887//exocytosis;GO:0006935//chemotaxis;GO:0006954//inflammatory response;GO:0006955//immune response;GO:0007159//leukocyte cell-cell adhesion;GO:0007165//signal t…	--
ENSG00000151006	1.75138	0.0177093	0.999113	PRSS53	serine protease 53 [Source:HGNC Symbol;Acc:HGNC:34407]	-	-	-	-	GO:0005576//extracellular region	GO:0004252//serine-type endopeptidase activity;GO:0005515//protein binding;GO:0008233//peptidase activity;GO:0008236//serine-type peptidase activity;GO:0016787//hydrolase activity	GO:0006508//proteolysis	--
ENSG00000135362	1.94399	0.0116632	0.999113	PRR5L	proline rich 5 like [Source:HGNC Symbol;Acc:HGNC:25878]	Environmental Information Processing	Signal transduction	ko04150//mTOR signaling pathway	K20411	GO:0031932//TORC2 complex	GO:0005515//protein binding;GO:0031625//ubiquitin protein ligase binding	GO:0001933//negative regulation of protein phosphorylation;GO:0001934//positive regulation of protein phosphorylation;GO:0006468//protein phosphorylation;GO:0009968//negative regulation of signal transduction;GO:0010762//regulation of fibroblast migration;GO:0014065//phosphatidylinositol 3-kinase signaling;GO:0014068//positive regulation of phosphatidylinositol 3-kinase signaling;GO:0034599//cell…	--
ENSG00000283239	2.03553	0.00825699	0.999113	KBTBD11-OT1	KBTBD11 overlapping transcript 1 [Source:NCBI gene (formerly Entrezgene);Acc:104266957]	-	-	-	-	GO:0016020//membrane	-	-	--
ENSG00000162645	2.15866	0.00794277	0.999113	GBP2	guanylate binding protein 2 [Source:HGNC Symbol;Acc:HGNC:4183]	Organismal Systems	Immune system	ko04621//NOD-like receptor signaling pathway	K20897	GO:0000139//Golgi membrane;GO:0005634//nucleus;GO:0005654//nucleoplasm;GO:0005737//cytoplasm;GO:0005794//Golgi apparatus;GO:0005829//cytosol;GO:0016020//membrane;GO:0031410//cytoplasmic vesicle;GO:0048471//perinuclear region of cytoplasm	GO:0000166//nucleotide binding;GO:0003924//GTPase activity;GO:0005515//protein binding;GO:0005525//GTP binding;GO:0016787//hydrolase activity;GO:0042802//identical protein binding;GO:0042803//protein homodimerization activity	GO:0002376//immune system process;GO:0006955//immune response;GO:0034504//protein localization to nucleus;GO:0042832//defense response to protozoan;GO:0050830//defense response to Gram-positive bacterium;GO:0050896//response to stimulus;GO:0071346//cellular response to interferon-gamma;GO:0071347//cellular response to interleukin-1;GO:0071356//cellular response to tumor necrosis factor	--
ENSG00000277075	2.16499	0.0307122	0.999113	H2AC8	H2A clustered histone 8 [Source:HGNC Symbol;Acc:HGNC:4724]	Organismal Systems;Human Diseases;Human Diseases;Cellular Processes	Immune system;Immune disease;Substance dependence;Cell growth and death	ko04613//Neutrophil extracellular trap formation;ko05322//Systemic lupus erythematosus;ko05034//Alcoholism;ko04217//Necroptosis	K11251;K11251;K11251;K11251	GO:0000786//nucleosome;GO:0005634//nucleus;GO:0005694//chromosome;GO:0043229//intracellular organelle;GO:0043505//CENP-A containing nucleosome;GO:0070062//extracellular exosome	GO:0003677//DNA binding;GO:0005515//protein binding;GO:0030527//structural constituent of chromatin;GO:0046982//protein heterodimerization activity	GO:0008285//negative regulation of cell population proliferation;GO:0061644//protein localization to CENP-A containing chromatin	--
ENSG00000258653	2.1911	0.00363384	0.999113	PTGR2	novel protein	-	-	-	-	-	GO:0016628//oxidoreductase activity, acting on the CH-CH group of donors, NAD or NADP as acceptor;GO:0036132//13-prostaglandin reductase activity;GO:0047522//15-oxoprostaglandin 13-oxidase activity	GO:0006693//prostaglandin metabolic process	--
ENSG00000198417	2.19812	0.00821775	0.999113	MT1F	metallothionein 1F [Source:HGNC Symbol;Acc:HGNC:7398]	-	-	-	-	GO:0005634//nucleus;GO:0005737//cytoplasm	GO:0005515//protein binding;GO:0008270//zinc ion binding;GO:0046872//metal ion binding	GO:0006882//cellular zinc ion homeostasis;GO:0010273//detoxification of copper ion;GO:0045926//negative regulation of growth;GO:0071248//cellular response to metal ion;GO:0071276//cellular response to cadmium ion;GO:0071280//cellular response to copper ion;GO:0071294//cellular response to zinc ion	--
ENSG00000015568	2.50587	0.0490628	0.999113	RGPD5	RANBP2 like and GRIP domain containing 5 [Source:HGNC Symbol;Acc:HGNC:32418]	-	-	-	-	GO:0005643//nuclear pore;GO:0005737//cytoplasm	GO:0005096//GTPase activator activity;GO:0005515//protein binding	GO:0006607//NLS-bearing protein import into nucleus;GO:0046907//intracellular transport	--
ENSG00000113389	2.53161	0.0404108	0.999113	NPR3	natriuretic peptide receptor 3 [Source:HGNC Symbol;Acc:HGNC:7945]	-	-	-	-	GO:0005886//plasma membrane;GO:0016020//membrane;GO:0016021//integral component of membrane;GO:0032991//protein-containing complex;GO:0070062//extracellular exosome	GO:0005515//protein binding;GO:0008528//G protein-coupled peptide receptor activity;GO:0016941//natriuretic peptide receptor activity;GO:0017046//peptide hormone binding;GO:0031404//chloride ion binding;GO:0038023//signaling receptor activity;GO:0042277//peptide binding;GO:0042562//hormone binding;GO:0042802//identical protein binding;GO:0042803//protein homodimerization activity	GO:0001501//skeletal system development;GO:0001525//angiogenesis;GO:0001974//blood vessel remodeling;GO:0002158//osteoclast proliferation;GO:0002931//response to ischemia;GO:0007165//signal transduction;GO:0007193//adenylate cyclase-inhibiting G protein-coupled receptor signaling pathway;GO:0007194//negative regulation of adenylate cyclase activity;GO:0007200//phospholipase C-activating G protein…	--
ENSG00000163053	2.84296	0.0322421	0.999113	SLC16A14	solute carrier family 16 member 14 [Source:HGNC Symbol;Acc:HGNC:26417]	-	-	-	-	GO:0005886//plasma membrane;GO:0016020//membrane	GO:0008028//monocarboxylic acid transmembrane transporter activity;GO:0015293//symporter activity;GO:0022857//transmembrane transporter activity	GO:0015718//monocarboxylic acid transport;GO:0055085//transmembrane transport	--
ENSG00000101695	2.96598	0.012809	0.999113	RNF125	ring finger protein 125 [Source:HGNC Symbol;Acc:HGNC:21150]	Organismal Systems	Immune system	ko04622//RIG-I-like receptor signaling pathway	K12170	GO:0000139//Golgi membrane;GO:0005794//Golgi apparatus;GO:0016020//membrane;GO:0034098//VCP-NPL4-UFD1 AAA ATPase complex;GO:0043231//intracellular membrane-bounded organelle	GO:0002039//p53 binding;GO:0005515//protein binding;GO:0008270//zinc ion binding;GO:0016740//transferase activity;GO:0031624//ubiquitin conjugating enzyme binding;GO:0046872//metal ion binding;GO:0061630//ubiquitin protein ligase activity	GO:0000209//protein polyubiquitination;GO:0002250//adaptive immune response;GO:0002376//immune system process;GO:0006511//ubiquitin-dependent protein catabolic process;GO:0016567//protein ubiquitination;GO:0032480//negative regulation of type I interferon production;GO:0039536//negative regulation of RIG-I signaling pathway;GO:1990830//cellular response to leukemia inhibitory factor	--
ENSG00000180616	3.04182	0.0453522	0.999113	SSTR2	somatostatin receptor 2 [Source:HGNC Symbol;Acc:HGNC:11331]	Environmental Information Processing;Environmental Information Processing;Organismal Systems;Organismal Systems	Signaling molecules and interaction;Signal transduction;Endocrine system;Digestive system	ko04080//Neuroactive ligand-receptor interaction;ko04024//cAMP signaling pathway;ko04935//Growth hormone synthesis, secretion and action;ko04971//Gastric acid secretion	K04218;K04218;K04218;K04218	GO:0005737//cytoplasm;GO:0005829//cytosol;GO:0005886//plasma membrane;GO:0016020//membrane;GO:0016021//integral component of membrane;GO:0043005//neuron projection;GO:0110165//cellular anatomical entity	GO:0004930//G protein-coupled receptor activity;GO:0004994//somatostatin receptor activity;GO:0005515//protein binding;GO:0030165//PDZ domain binding;GO:0042277//peptide binding;GO:0042923//neuropeptide binding	GO:0006937//regulation of muscle contraction;GO:0007165//signal transduction;GO:0007186//G protein-coupled receptor signaling pathway;GO:0007187//G protein-coupled receptor signaling pathway, coupled to cyclic nucleotide second messenger;GO:0007193//adenylate cyclase-inhibiting G protein-coupled receptor signaling pathway;GO:0007218//neuropeptide signaling pathway;GO:0007283//spermatogenesis;GO:0…	--
ENSG00000196993	3.31504	0.0334028	0.999113	NPIPB9	nuclear pore complex interacting protein family member B9 [Source:HGNC Symbol;Acc:HGNC:41987]	-	-	-	-	GO:0005654//nucleoplasm	-	-	--
ENSG00000080573	3.41609	0.0212734	0.999113	COL5A3	collagen type V alpha 3 chain [Source:HGNC Symbol;Acc:HGNC:14864]	Organismal Systems	Digestive system	ko04974//Protein digestion and absorption	K19721	GO:0005576//extracellular region;GO:0005581//collagen trimer;GO:0005588//collagen type V trimer;GO:0005615//extracellular space;GO:0005788//endoplasmic reticulum lumen;GO:0031012//extracellular matrix;GO:0062023//collagen-containing extracellular matrix	GO:0005201//extracellular matrix structural constituent;GO:0005518//collagen binding;GO:0008201//heparin binding;GO:0030020//extracellular matrix structural constituent conferring tensile strength;GO:0043394//proteoglycan binding	GO:0007160//cell-matrix adhesion;GO:0030198//extracellular matrix organization;GO:0030199//collagen fibril organization;GO:0043588//skin development	--
ENSG00000158486	4.26411	0.00036027	0.999113	DNAH3	dynein axonemal heavy chain 3 [Source:HGNC Symbol;Acc:HGNC:2949]	Human Diseases;Human Diseases;Human Diseases	Neurodegenerative disease;Neurodegenerative disease;Neurodegenerative disease	ko05022//Pathways of neurodegeneration - multiple diseases;ko05014//Amyotrophic lateral sclerosis;ko05016//Huntington disease	K10408;K10408;K10408	GO:0005737//cytoplasm;GO:0005856//cytoskeleton;GO:0005858//axonemal dynein complex;GO:0005874//microtubule;GO:0005929//cilium;GO:0005930//axoneme;GO:0030286//dynein complex;GO:0042995//cell projection;GO:0097729//9+2 motile cilium	GO:0000166//nucleotide binding;GO:0003777//microtubule motor activity;GO:0005524//ATP binding;GO:0008569//minus-end-directed microtubule motor activity;GO:0045505//dynein intermediate chain binding;GO:0051959//dynein light intermediate chain binding	GO:0007018//microtubule-based movement;GO:0060285//cilium-dependent cell motility	--
ENSG00000196358	4.33298	0.0213023	0.999113	NTNG2	netrin G2 [Source:HGNC Symbol;Acc:HGNC:14288]	Organismal Systems;Environmental Information Processing	Development and regeneration;Signaling molecules and interaction	ko04360//Axon guidance;ko04514//Cell adhesion molecules	K16359;K16359	GO:0005576//extracellular region;GO:0005886//plasma membrane;GO:0016020//membrane;GO:0030424//axon;GO:0043256//laminin complex;GO:0048787//presynaptic active zone membrane;GO:0098685//Schaffer collateral - CA1 synapse;GO:0098978//glutamatergic synapse	GO:0003674//molecular_function;GO:0005515//protein binding	GO:0007399//nervous system development;GO:0007409//axonogenesis;GO:0009887//animal organ morphogenesis;GO:0009888//tissue development;GO:0010975//regulation of neuron projection development;GO:0016477//cell migration;GO:0030154//cell differentiation;GO:0034446//substrate adhesion-dependent cell spreading;GO:0050804//modulation of chemical synaptic transmission;GO:0070831//basement membrane assemb…	--
ENSG00000103723	4.50779	0.0173078	0.999113	AP3B2	adaptor related protein complex 3 subunit beta 2 [Source:HGNC Symbol;Acc:HGNC:567]	Cellular Processes	Transport and catabolism	ko04142//Lysosome	K12397	GO:0005769//early endosome;GO:0005794//Golgi apparatus;GO:0016020//membrane;GO:0030117//membrane coat;GO:0030119//AP-type membrane coat adaptor complex;GO:0030123//AP-3 adaptor complex;GO:0030665//clathrin-coated vesicle membrane;GO:0031410//cytoplasmic vesicle;GO:0097708//intracellular vesicle;GO:0098793//presynapse;GO:1904115//axon cytoplasm	GO:0030276//clathrin binding	GO:0006886//intracellular protein transport;GO:0008089//anterograde axonal transport;GO:0015031//protein transport;GO:0016183//synaptic vesicle coating;GO:0016192//vesicle-mediated transport;GO:0035654//clathrin-coated vesicle cargo loading, AP-3-mediated;GO:0036465//synaptic vesicle recycling;GO:0046907//intracellular transport;GO:0048490//anterograde synaptic vesicle transport	--
ENSG00000163359	4.60204	0.0391259	0.999113	COL6A3	collagen type VI alpha 3 chain [Source:HGNC Symbol;Acc:HGNC:2213]	Environmental Information Processing;Human Diseases;Cellular Processes;Organismal Systems;Environmental Information Processing	Signal transduction;Infectious disease: viral;Cellular community - eukaryotes;Digestive system;Signaling molecules and interaction	ko04151//PI3K-Akt signaling pathway;ko05165//Human papillomavirus infection;ko04510//Focal adhesion;ko04974//Protein digestion and absorption;ko04512//ECM-receptor interaction	K06238;K06238;K06238;K06238;K06238	GO:0005576//extracellular region;GO:0005581//collagen trimer;GO:0005589//collagen type VI trimer;GO:0005615//extracellular space;GO:0005788//endoplasmic reticulum lumen;GO:0031012//extracellular matrix;GO:0042383//sarcolemma;GO:0062023//collagen-containing extracellular matrix;GO:0070062//extracellular exosome;GO:1903561//extracellular vesicle	GO:0004867//serine-type endopeptidase inhibitor activity;GO:0005515//protein binding;GO:0030020//extracellular matrix structural constituent conferring tensile strength;GO:0030414//peptidase inhibitor activity	GO:0007155//cell adhesion;GO:0007517//muscle organ development;GO:0010466//negative regulation of peptidase activity	--
ENSG00000081479	5.01495	0.038536	0.999113	LRP2	LDL receptor related protein 2 [Source:HGNC Symbol;Acc:HGNC:6694]	Organismal Systems;Environmental Information Processing;Organismal Systems	Endocrine system;Signal transduction;Digestive system	ko04918//Thyroid hormone synthesis;ko04340//Hedgehog signaling pathway;ko04979//Cholesterol metabolism	K06233;K06233;K06233	GO:0005764//lysosome;GO:0005765//lysosomal membrane;GO:0005768//endosome;GO:0005783//endoplasmic reticulum;GO:0005794//Golgi apparatus;GO:0005886//plasma membrane;GO:0005903//brush border;GO:0005905//clathrin-coated pit;GO:0009897//external side of plasma membrane;GO:0016020//membrane;GO:0016324//apical plasma membrane;GO:0030139//endocytic vesicle;GO:0030424//axon;GO:0030425//dendrite;GO:0030669…	GO:0005041//low-density lipoprotein particle receptor activity;GO:0005509//calcium ion binding;GO:0005515//protein binding;GO:0017124//SH3 domain binding;GO:0031994//insulin-like growth factor I binding;GO:0038024//cargo receptor activity;GO:0042562//hormone binding;GO:0046872//metal ion binding;GO:0051087//chaperone binding;GO:0140318//protein transporter activity	GO:0001523//retinoid metabolic process;GO:0001822//kidney development;GO:0001843//neural tube closure;GO:0003139//secondary heart field specification;GO:0003148//outflow tract septum morphogenesis;GO:0003223//ventricular compact myocardium morphogenesis;GO:0003281//ventricular septum development;GO:0006629//lipid metabolic process;GO:0006897//endocytosis;GO:0006898//receptor-mediated endocytosis;…	--
ENSG00000149968	5.10769	0.00277549	0.999113	MMP3	matrix metallopeptidase 3 [Source:HGNC Symbol;Acc:HGNC:7173]	Human Diseases;Human Diseases;Human Diseases;Human Diseases;Environmental Information Processing;Human Diseases;Organismal Systems	Infectious disease: viral;Cancer: overview;Cardiovascular disease;Immune disease;Signal transduction;Cancer: specific types;Immune system	ko05171//Coronavirus disease - COVID-19;ko05202//Transcriptional misregulation in cancer;ko05417//Lipid and atherosclerosis;ko05323//Rheumatoid arthritis;ko04668//TNF signaling pathway;ko05215//Prostate cancer;ko04657//IL-17 signaling pathway	K01394;K01394;K01394;K01394;K01394;K01394;K01394	GO:0005576//extracellular region;GO:0005615//extracellular space;GO:0005634//nucleus;GO:0005737//cytoplasm;GO:0031012//extracellular matrix	GO:0004175//endopeptidase activity;GO:0004222//metalloendopeptidase activity;GO:0004252//serine-type endopeptidase activity;GO:0005515//protein binding;GO:0008233//peptidase activity;GO:0008237//metallopeptidase activity;GO:0008270//zinc ion binding;GO:0016787//hydrolase activity;GO:0046872//metal ion binding	GO:0002376//immune system process;GO:0006508//proteolysis;GO:0010727//negative regulation of hydrogen peroxide metabolic process;GO:0022617//extracellular matrix disassembly;GO:0030198//extracellular matrix organization;GO:0030574//collagen catabolic process;GO:0031334//positive regulation of protein-containing complex assembly;GO:0045087//innate immune response;GO:0071492//cellular response to U…	--
ENSG00000123119	5.62449	0.0430774	0.999113	NECAB1	N-terminal EF-hand calcium binding protein 1 [Source:HGNC Symbol;Acc:HGNC:20983]	-	-	-	-	GO:0005654//nucleoplasm;GO:0005737//cytoplasm;GO:0005829//cytosol	GO:0003674//molecular_function;GO:0005509//calcium ion binding;GO:0005515//protein binding;GO:0042802//identical protein binding;GO:0046872//metal ion binding	GO:0001835//blastocyst hatching;GO:0008150//biological_process;GO:0042984//regulation of amyloid precursor protein biosynthetic process	--
ENSG00000204956	5.83289	0.0166922	0.999113	PCDHGA1	protocadherin gamma subfamily A, 1 [Source:HGNC Symbol;Acc:HGNC:8696]	-	-	-	-	GO:0005886//plasma membrane;GO:0016020//membrane	GO:0005509//calcium ion binding	GO:0007155//cell adhesion;GO:0007156//homophilic cell adhesion via plasma membrane adhesion molecules;GO:0007399//nervous system development	--
ENSG00000164692	5.92283	0.04814	0.999113	COL1A2	collagen type I alpha 2 chain [Source:HGNC Symbol;Acc:HGNC:2198]	Environmental Information Processing;Human Diseases;Human Diseases;Human Diseases;Cellular Processes;Human Diseases;Organismal Systems;Organismal Systems;Organismal Systems;Human Diseases;Environmental Information Processing	Signal transduction;Infectious disease: viral;Cardiovascular disease;Cancer: overview;Cellular community - eukaryotes;Infectious disease: parasitic;Endocrine system;Immune system;Digestive system;Endocrine and metabolic disease;Signaling molecules and interaction	ko04151//PI3K-Akt signaling pathway;ko05165//Human papillomavirus infection;ko05415//Diabetic cardiomyopathy;ko05205//Proteoglycans in cancer;ko04510//Focal adhesion;ko05146//Amoebiasis;ko04926//Relaxin signaling pathway;ko04611//Platelet activation;ko04974//Protein digestion and absorption;ko04933//AGE-RAGE signaling pathway in diabetic complications;ko04512//ECM-receptor interaction	K06236;K06236;K06236;K06236;K06236;K06236;K06236;K06236;K06236;K06236;K06236	GO:0005576//extracellular region;GO:0005581//collagen trimer;GO:0005584//collagen type I trimer;GO:0005615//extracellular space;GO:0005783//endoplasmic reticulum;GO:0005788//endoplasmic reticulum lumen;GO:0031012//extracellular matrix;GO:0062023//collagen-containing extracellular matrix;GO:0070062//extracellular exosome	GO:0002020//protease binding;GO:0005201//extracellular matrix structural constituent;GO:0005515//protein binding;GO:0030020//extracellular matrix structural constituent conferring tensile strength;GO:0030674//protein-macromolecule adaptor activity;GO:0042802//identical protein binding;GO:0046332//SMAD binding;GO:0046872//metal ion binding;GO:0048407//platelet-derived growth factor binding	GO:0001501//skeletal system development;GO:0001568//blood vessel development;GO:0007179//transforming growth factor beta receptor signaling pathway;GO:0007266//Rho protein signal transduction;GO:0008217//regulation of blood pressure;GO:0030198//extracellular matrix organization;GO:0030199//collagen fibril organization;GO:0030282//bone mineralization;GO:0032963//collagen metabolic process;GO:00424…	--
ENSG00000262304	5.97728	0.0399463	0.999113	SHPK	novel readthrough SHPK-TRPV1 protein	-	-	-	-	-	GO:0016301//kinase activity;GO:0050277//sedoheptulokinase activity	GO:0005975//carbohydrate metabolic process	--
ENSG00000266094	6.09452	0.047117	0.999113	RASSF5	Ras association domain family member 5 [Source:HGNC Symbol;Acc:HGNC:17609]	Human Diseases;Environmental Information Processing;Environmental Information Processing;Cellular Processes;Organismal Systems;Human Diseases	Cancer: overview;Signal transduction;Signal transduction;Cell growth and death;Immune system;Cancer: specific types	ko05200//Pathways in cancer;ko04014//Ras signaling pathway;ko04015//Rap1 signaling pathway;ko04218//Cellular senescence;ko04670//Leukocyte transendothelial migration;ko05223//Non-small cell lung cancer	K08015;K08015;K08015;K08015;K08015;K08015	GO:0005634//nucleus;GO:0005737//cytoplasm;GO:0005856//cytoskeleton;GO:0005874//microtubule	GO:0005515//protein binding;GO:0031267//small GTPase binding;GO:0042802//identical protein binding;GO:0046872//metal ion binding	GO:0006915//apoptotic process;GO:0007165//signal transduction;GO:0031398//positive regulation of protein ubiquitination;GO:0042981//regulation of apoptotic process;GO:0046651//lymphocyte proliferation;GO:0050672//negative regulation of lymphocyte proliferation;GO:1900180//regulation of protein localization to nucleus	--
ENSG00000285953	6.46489	0.0466901	0.999113	KRIT1	novel protein	Environmental Information Processing;Organismal Systems	Signal transduction;Aging	ko04015//Rap1 signaling pathway;ko04212//Longevity regulating pathway - worm	K17705;K17705	GO:0005856//cytoskeleton;GO:0005886//plasma membrane	GO:0005515//protein binding;GO:0005525//GTP binding	GO:0007165//signal transduction;GO:0016525//negative regulation of angiogenesis;GO:0045454//cell redox homeostasis;GO:2000114//regulation of establishment of cell polarity	--
ENSG00000049540	6.82443	0.0107292	0.999113	ELN	elastin [Source:HGNC Symbol;Acc:HGNC:3327]	Organismal Systems	Digestive system	ko04974//Protein digestion and absorption	K14211	GO:0005576//extracellular region;GO:0031012//extracellular matrix;GO:0062023//collagen-containing extracellular matrix;GO:0071953//elastic fiber	GO:0005201//extracellular matrix structural constituent;GO:0005515//protein binding;GO:0030023//extracellular matrix constituent conferring elasticity;GO:0050840//extracellular matrix binding	GO:0003151//outflow tract morphogenesis;GO:0003180//aortic valve morphogenesis;GO:0007519//skeletal muscle tissue development;GO:0007585//respiratory gaseous exchange by respiratory system;GO:0008015//blood circulation;GO:0009887//animal organ morphogenesis;GO:0030198//extracellular matrix organization;GO:0030833//regulation of actin filament polymerization;GO:0043149//stress fiber assembly;GO:00…	--
ENSG00000124159	7.08037	0.0181144	0.999113	MATN4	matrilin 4 [Source:HGNC Symbol;Acc:HGNC:6910]	-	-	-	-	GO:0005576//extracellular region;GO:0062023//collagen-containing extracellular matrix;GO:0120216//matrilin complex	GO:0005509//calcium ion binding;GO:0005515//protein binding	GO:0016043//cellular component organization;GO:0030198//extracellular matrix organization	--
ENSG00000251569	7.16658	0.0185402	0.999113	BBS5	novel protein	-	-	-	-	GO:0034464//BBSome	GO:0005515//protein binding	-	--
ENSG00000285932	7.40372	0.00878017	0.999113	COX15	novel transcript	Metabolism;Organismal Systems;Metabolism;Metabolism	Global and overview maps;Environmental adaptation;Energy metabolism;Metabolism of cofactors and vitamins	ko01100//Metabolic pathways;ko04714//Thermogenesis;ko00190//Oxidative phosphorylation;ko00860//Porphyrin metabolism	K02259;K02259;K02259;K02259	GO:0016020//membrane	GO:0016653//oxidoreductase activity, acting on NAD(P)H, heme protein as acceptor	GO:0006784//heme A biosynthetic process	--
ENSG00000152137	7.47573	0.0431828	0.999113	HSPB8	heat shock protein family B (small) member 8 [Source:HGNC Symbol;Acc:HGNC:30171]	-	-	-	-	GO:0005634//nucleus;GO:0005654//nucleoplasm;GO:0005737//cytoplasm;GO:0005829//cytosol;GO:0101031//chaperone complex	GO:0005515//protein binding;GO:0042802//identical protein binding;GO:0042803//protein homodimerization activity	GO:0034620//cellular response to unfolded protein;GO:1905337//positive regulation of aggrephagy	--
ENSG00000100604	7.55714	0.0331567	0.999113	CHGA	chromogranin A [Source:HGNC Symbol;Acc:HGNC:1929]	-	-	-	-	GO:0005576//extracellular region;GO:0005615//extracellular space;GO:0030133//transport vesicle;GO:0030141//secretory granule;GO:0031410//cytoplasmic vesicle;GO:0042583//chromaffin granule;GO:0048471//perinuclear region of cytoplasm;GO:0098992//neuronal dense core vesicle	-	GO:0002026//regulation of the force of heart contraction;GO:0002551//mast cell chemotaxis;GO:0006996//organelle organization;GO:0008217//regulation of blood pressure;GO:0031640//killing of cells of other organism;GO:0033366//protein localization to secretory granule;GO:0033604//negative regulation of catecholamine secretion;GO:0042742//defense response to bacterium;GO:0043303//mast cell degranula…	--
ENSG00000197632	7.6677	0.0290812	0.999113	SERPINB2	serpin family B member 2 [Source:HGNC Symbol;Acc:HGNC:8584]	Organismal Systems	Immune system	ko04610//Complement and coagulation cascades	K19821	GO:0001533//cornified envelope;GO:0005576//extracellular region;GO:0005615//extracellular space;GO:0005737//cytoplasm;GO:0005886//plasma membrane	GO:0004867//serine-type endopeptidase inhibitor activity;GO:0030414//peptidase inhibitor activity	GO:0010466//negative regulation of peptidase activity;GO:0010951//negative regulation of endopeptidase activity;GO:0042060//wound healing;GO:0042730//fibrinolysis;GO:0043066//negative regulation of apoptotic process	--
ENSG00000165799	7.92085	0.0498967	0.999113	RNASE7	ribonuclease A family member 7 [Source:HGNC Symbol;Acc:HGNC:19278]	-	-	-	-	GO:0005576//extracellular region;GO:0005615//extracellular space;GO:0005737//cytoplasm	GO:0001530//lipopolysaccharide binding;GO:0003676//nucleic acid binding;GO:0004518//nuclease activity;GO:0004519//endonuclease activity;GO:0004540//ribonuclease activity;GO:0016787//hydrolase activity;GO:0042834//peptidoglycan binding	GO:0016070//RNA metabolic process;GO:0019731//antibacterial humoral response;GO:0042742//defense response to bacterium;GO:0045087//innate immune response;GO:0050829//defense response to Gram-negative bacterium;GO:0050830//defense response to Gram-positive bacterium;GO:0050832//defense response to fungus;GO:0051715//cytolysis in other organism;GO:0061844//antimicrobial humoral immune response medi…	--
ENSG00000261459	8.02791	0.0494728	0.999113	ZNF764	novel transcript	Human Diseases	Infectious disease: viral	ko05168//Herpes simplex virus 1 infection	K09228	-	-	-	zf-C2H2
ENSG00000125931	8.10329	0.0493087	0.999113	CITED1	Cbp/p300 interacting transactivator with Glu/Asp rich carboxy-terminal domain 1 [Source:HGNC Symbol;Acc:HGNC:1986]	-	-	-	-	GO:0005634//nucleus;GO:0005654//nucleoplasm;GO:0005737//cytoplasm;GO:0005829//cytosol	GO:0003682//chromatin binding;GO:0003713//transcription coactivator activity;GO:0005515//protein binding;GO:0008022//protein C-terminus binding;GO:0042803//protein homodimerization activity;GO:0050693//LBD domain binding;GO:0070410//co-SMAD binding	GO:0001570//vasculogenesis;GO:0001656//metanephros development;GO:0001658//branching involved in ureteric bud morphogenesis;GO:0001890//placenta development;GO:0006355//regulation of transcription, DNA-templated;GO:0006357//regulation of transcription by RNA polymerase II;GO:0006913//nucleocytoplasmic transport;GO:0006915//apoptotic process;GO:0007179//transforming growth factor beta receptor sig…	--
ENSG00000113140	8.22239	0.0397447	0.999113	SPARC	secreted protein acidic and cysteine rich [Source:HGNC Symbol;Acc:HGNC:11219]	-	-	-	-	GO:0005576//extracellular region;GO:0005604//basement membrane;GO:0005615//extracellular space;GO:0005737//cytoplasm;GO:0005886//plasma membrane;GO:0009986//cell surface;GO:0016020//membrane;GO:0016363//nuclear matrix;GO:0031091//platelet alpha granule;GO:0031092//platelet alpha granule membrane;GO:0031093//platelet alpha granule lumen;GO:0043231//intracellular membrane-bounded organelle;GO:00620…	GO:0005201//extracellular matrix structural constituent;GO:0005509//calcium ion binding;GO:0005515//protein binding;GO:0005518//collagen binding;GO:0046872//metal ion binding;GO:0050840//extracellular matrix binding	GO:0001937//negative regulation of endothelial cell proliferation;GO:0010595//positive regulation of endothelial cell migration;GO:0016525//negative regulation of angiogenesis;GO:0022604//regulation of cell morphogenesis;GO:0048856//anatomical structure development	--
ENSG00000129214	8.23362	0.0107374	0.999113	SHBG	sex hormone binding globulin [Source:HGNC Symbol;Acc:HGNC:10839]	-	-	-	-	GO:0005576//extracellular region;GO:0070062//extracellular exosome	GO:0005496//steroid binding;GO:0005497//androgen binding;GO:0005515//protein binding;GO:0008289//lipid binding	-	--
ENSG00000249240	8.91687	0.00888311	0.999113	PLEKHO2	novel protein	-	-	-	-	-	GO:0005515//protein binding	GO:0071888//macrophage apoptotic process	--
